# Supplementary material for: Investigation on the predictive power of tolerance factor τ for A-site double perovskite oxides
Source: Royal Society of Chemistry journal article supplement (doi:10.1039/d3dt01990j), 2023-01-01
Supplement: d3dt01990j1.pdf [file d3dt01990j1.pdf]

# Supporting Information for "Investigation on the predictive power of tolerance factor $\tau$ for A-site double perovskite oxides"

Elisabeth Albrecht and Antti J. Karttunen\*

*Department of Chemistry and Materials Science,  
Aalto University, P.O. Box 16100, FI-00076 Aalto, Finland*

---

\* antti.karttunen@aalto.fi

## I. DATABASE OF INVESTIGATED DOUBLE PEROVSKITE OXIDE COMPOSITIONS

Database of investigated double perovskite oxide compositions is provided as a separate file in Excel format. On the first worksheet in the file, only Shannon ionic radii have been used to obtain the  $\tau$  values. On the second worksheet, BVS parameters have been additionally used to obtain ionic radii for ions which lack Shannon ionic radii for 12-coordination. In the database, the final four columns tell whether a composition is currently found in the Inorganic Crystal Structure Database (ICSD). **tau Per ICSD Per:** is predicted to be a perovskite and found in ICSD as a perovskite; **tau Per ICSD NonPer:** is predicted to be a perovskite but found with a different structure in ICSD; **tau Nonper ICSD NonPer:** is predicted to not be a perovskite and found in ICSD with a non-perovskite structure type; **tau Nonper ICSD Per:** is predicted to not be a perovskite but found in ICSD as a perovskite.

## II. CRYSTAL STRUCTURES OF THE STUDIED SYSTEMS

The optimized crystal structures of the studied systems are provided as separate files in CIF format.

## III. ABSOLUTE ELECTRONIC ENERGIES PER FORMULA UNIT ( $Z$ )

Absolute energies are given in atomic units (Hartree). Relative energies in kJ/mol per  $Z$  are given relative to the lowest-energy structure of each chemical composition.

Table I. Columnar A-Site Ordering of CsScTi<sub>2</sub>O<sub>6</sub>

| Tilt System | Energy/Z [a.u.] | Relative Energy [kJ/mol] |
|-------------|-----------------|--------------------------|
| $a^+a^+a^+$ | -2930.970416    | 220                      |
| $a^+a^+c^-$ | -2930.983304    | 186                      |
| $a^-b^+a^-$ | -2930.970689    | 219                      |
| $a^-b^-b^-$ | -2930.962572    | 240                      |
| $a^-a^-a^-$ | -2930.958352    | 251                      |
| $a^0b^+b^+$ | -2930.970211    | 220                      |
| $a^+b^0c^-$ | -2930.970494    | 219                      |
| $a^0b^-b^-$ | -2930.962532    | 240                      |
| $a^0a^0c^+$ | -2930.942609    | 293                      |
| $a^0a^0c^-$ | -2930.938555    | 303                      |
| $a^0a^0a^0$ | -2930.937672    | 306                      |

Table II. Planar A-Site Ordering of CsScTi<sub>2</sub>O<sub>6</sub>

| Tilt System | Energy/Z [a.u.] | Relative Energy [kJ/mol] |
|-------------|-----------------|--------------------------|
| $a^+a^+a^+$ | -2930.979370    | 172                      |
| $a^+a^+c^-$ | -2930.982923    | 162                      |
| $a^-b^+a^-$ | -2931.044726    | 0                        |
| $a^-b^-b^-$ | -2931.031960    | 34                       |
| $a^-a^-a^-$ | -2931.020189    | 64                       |
| $a^0b^+b^+$ | -2930.974386    | 185                      |
| $a^+b^0c^-$ | -2931.019126    | 67                       |
| $a^0b^-b^-$ | -2931.001419    | 114                      |
| $a^0a^0c^+$ | -2930.972935    | 188                      |
| $a^0a^0c^-$ | -2930.976981    | 178                      |
| $a^0a^0a^0$ | -2930.967520    | 203                      |

Table III. Rock Salt A-Site Ordering of CsScTi<sub>2</sub>O<sub>6</sub>

| Tilt System | Energy/Z [a.u.] | Relative Energy [kJ/mol] |
|-------------|-----------------|--------------------------|
| $a^+a^+a^+$ | -2930.933176    | 317                      |
| $a^+a^+c^-$ | -2930.953032    | 265                      |
| $a^-b^+a^-$ | -2931.023285    | 81                       |
| $a^-b^-b^-$ | -               | -                        |
| $a^-a^-a^-$ | -               | -                        |
| $a^0b^+b^+$ | -2930.941958    | 294                      |
| $a^+b^0c^-$ | -2931.013493    | 106                      |
| $a^0b^-b^-$ | -               | -                        |
| $a^0a^0c^+$ | -2930.935727    | 311                      |
| $a^0a^0c^-$ | -2930.949965    | 273                      |
| $a^0a^0a^0$ | -2930.873833    | 473                      |

Table IV. Columnar A-Site Ordering of YRbTi<sub>2</sub>O<sub>6</sub>

| Tilt System | Energy/Z [a.u.] | Relative Energy [kJ/mol] |
|-------------|-----------------|--------------------------|
| $a^+a^+a^+$ | -2212.815026    | 74                       |
| $a^+a^+c^-$ | -2212.814905    | 74                       |
| $a^-b^+a^-$ | -2212.810291    | 86                       |
| $a^-b^-b^-$ | -2212.807763    | 93                       |
| $a^-a^-a^-$ | -2212.805262    | 100                      |
| $a^0b^+b^+$ | -2212.814899    | 74                       |
| $a^+b^0c^-$ | -2212.843203    | 0                        |
| $a^0b^-b^-$ | -2212.807772    | 93                       |
| $a^0a^0c^+$ | -2212.802939    | 106                      |
| $a^0a^0c^-$ | -2212.803378    | 105                      |
| $a^0a^0a^0$ | -2212.797404    | 120                      |

Table V. Planar A-Site Ordering of YRbTi<sub>2</sub>O<sub>6</sub>

| Tilt System | Energy/Z [a.u.] | Relative Energy [kJ/mol] |
|-------------|-----------------|--------------------------|
| $a^+a^+a^+$ | -2212.823192    | 53                       |
| $a^+a^+c^-$ | -2212.823046    | 53                       |
| $a^-b^+a^-$ | -2212.830042    | 35                       |
| $a^-b^-b^-$ | -2212.823397    | 52                       |
| $a^-a^-a^-$ | -2212.822985    | 53                       |
| $a^0b^+b^+$ | -2212.821915    | 56                       |
| $a^+b^0c^-$ | -2212.826897    | 43                       |
| $a^0b^-b^-$ | -2212.823317    | 52                       |
| $a^0a^0c^+$ | -2212.815461    | 73                       |
| $a^0a^0c^-$ | -2212.821135    | 58                       |
| $a^0a^0a^0$ | -2212.820837    | 59                       |

Table VI. Rock Salt A-Site Ordering of YRbTi<sub>2</sub>O<sub>6</sub>

| Tilt System | Energy/Z [a.u.] | Relative Energy [kJ/mol] |
|-------------|-----------------|--------------------------|
| $a^+a^+a^+$ | -2212.783521    | 157                      |
| $a^+a^+c^-$ | -2212.795828    | 124                      |
| $a^-b^+a^-$ | -2212.802313    | 107                      |
| $a^-b^-b^-$ | -2212.798448    | 118                      |
| $a^-a^-a^-$ | -2212.801118    | 110                      |
| $a^0b^+b^+$ | -2212.786199    | 150                      |
| $a^+b^0c^-$ | -2212.803817    | 103                      |
| $a^0b^-b^-$ | -2212.798429    | 118                      |
| $a^0a^0c^+$ | -2212.785915    | 150                      |
| $a^0a^0c^-$ | -2212.795261    | 126                      |
| $a^0a^0a^0$ | -2212.766282    | 202                      |
