# Supplementary material for: Investigation on the predictive power of tolerance factor τ for A-site double perovskite oxides
Source: Royal Society of Chemistry journal article supplement (doi:10.1039/d3dt01990j), 2023-01-01
Supplement: d3dt01990j2.xlsx [file d3dt01990j2.xlsx]

## Sheet: Shannon radii
A	A'	B	X	nA	nA'	Ox difference	nB	nX	rA	rA'	rA adj	rB	rX	t	tau	tau pred	r difference	tau Per ICSD Per	tau Per ICSD Nonper	tau Nonper ICSD Nonper	tau Nonper ICSD Per
Li	B	Ti	O	1	3	2	4	-2	0.92	0.27	0.595	0.605	1.4	0.70358	-119.7	YES	0.65	0	0	0	0
Be	Zn	Ti	O	2	2	0	4	-2	0.45	0.74	0.595	0.605	1.4	0.70358	-119.7	YES	0.29	0	0	0	0
Be	Cu	Ti	O	2	2	0	4	-2	0.45	0.73	0.59	0.605	1.4	0.701817	-79.3733	YES	0.28	0	0	0	0
Be	Ge	Ti	O	2	2	0	4	-2	0.45	0.73	0.59	0.605	1.4	0.701817	-79.3733	YES	0.28	0	0	0	0
Be	Ni	Ti	O	2	2	0	4	-2	0.45	0.69	0.57	0.605	1.4	0.694763	-33.3059	YES	0.24	0	0	0	0
Cu	B	Ti	O	1	3	2	4	-2	0.77	0.27	0.52	0.605	1.4	0.67713	-13.0401	YES	0.5	0	0	0	0
Cs	La	Ti	O	1	3	2	4	-2	1.88	1.36	1.62	0.605	1.4	1.06507	3.75123	YES	0.52	0	0	0	0
Cs	Nd	Ti	O	1	3	2	4	-2	1.88	1.27	1.575	0.605	1.4	1.0492	3.75584	YES	0.61	0	0	0	0
Cs	Sm	Ti	O	1	3	2	4	-2	1.88	1.24	1.56	0.605	1.4	1.04391	3.75847	YES	0.64	0	0	0	0
Rb	La	Ti	O	1	3	2	4	-2	1.72	1.36	1.54	0.605	1.4	1.03685	3.7629	YES	0.36	Perovskite	0	0	0
Cs	Pr	Ti	O	1	3	2	4	-2	1.88	1.179	1.5295	0.605	1.4	1.03315	3.76567	YES	0.701	0	0	0	0
Sr	Ba	Ti	O	2	2	0	4	-2	1.44	1.61	1.525	0.605	1.4	1.03156	3.76695	YES	0.17	Perovskite	0	0	0
Cs	Bi	Ti	O	1	3	2	4	-2	1.88	1.17	1.525	0.605	1.4	1.03156	3.76695	YES	0.71	0	0	0	0
Cs	Ho	Ti	O	1	3	2	4	-2	1.88	1.12	1.5	0.605	1.4	1.02275	3.7752	YES	0.76	0	0	0	0
K	La	Ti	O	1	3	2	4	-2	1.64	1.36	1.5	0.605	1.4	1.02275	3.7752	YES	0.28	Perovskite	0	0	0
Rb	Nd	Ti	O	1	3	2	4	-2	1.72	1.27	1.495	0.605	1.4	1.02098	3.77708	YES	0.45	0	0	0	0
Cs	Gd	Ti	O	1	3	2	4	-2	1.88	1.107	1.4935	0.605	1.4	1.02046	3.77766	YES	0.773	0	0	0	0
Cs	Tb	Ti	O	1	3	2	4	-2	1.88	1.095	1.4875	0.605	1.4	1.01834	3.78006	YES	0.785	0	0	0	0
Cs	Dy	Ti	O	1	3	2	4	-2	1.88	1.083	1.4815	0.605	1.4	1.01622	3.78258	YES	0.797	0	0	0	0
Rb	Sm	Ti	O	1	3	2	4	-2	1.72	1.24	1.48	0.605	1.4	1.01569	3.78323	YES	0.48	0	0	0	0
Cs	Y	Ti	O	1	3	2	4	-2	1.88	1.075	1.4775	0.605	1.4	1.01481	3.78433	YES	0.805	0	0	0	0
Ca	Ba	Ti	O	2	2	0	4	-2	1.34	1.61	1.475	0.605	1.4	1.01393	3.78545	YES	0.27	Perovskite	0	0	0
Cs	Er	Ti	O	1	3	2	4	-2	1.88	1.062	1.471	0.605	1.4	1.01252	3.78729	YES	0.818	0	0	0	0
Cs	Tm	Ti	O	1	3	2	4	-2	1.88	1.052	1.466	0.605	1.4	1.01076	3.78967	YES	0.828	0	0	0	0
Cs	Yb	Ti	O	1	3	2	4	-2	1.88	1.042	1.461	0.605	1.4	1.00899	3.79215	YES	0.838	0	0	0	0
Ba	Cd	Ti	O	2	2	0	4	-2	1.61	1.31	1.46	0.605	1.4	1.00864	3.79265	YES	0.3	0	0	0	0
Cs	Lu	Ti	O	1	3	2	4	-2	1.88	1.032	1.456	0.605	1.4	1.00723	3.79471	YES	0.848	0	0	0	0
K	Nd	Ti	O	1	3	2	4	-2	1.64	1.27	1.455	0.605	1.4	1.00688	3.79523	YES	0.37	0	0	0	0
Rb	Pr	Ti	O	1	3	2	4	-2	1.72	1.179	1.4495	0.605	1.4	1.00494	3.79818	YES	0.541	0	0	0	0
Cs	Ce	Ti	O	1	3	2	4	-2	1.88	1.01	1.445	0.605	1.4	1.00335	3.80068	YES	0.87	0	0	0	0
Rb	Bi	Ti	O	1	3	2	4	-2	1.72	1.17	1.445	0.605	1.4	1.00335	3.80068	YES	0.55	0	0	0	0
K	Sm	Ti	O	1	3	2	4	-2	1.64	1.24	1.44	0.605	1.4	1.00159	3.80355	YES	0.4	0	0	0	0
Rb	Ho	Ti	O	1	3	2	4	-2	1.72	1.12	1.42	0.605	1.4	0.994534	3.81605	YES	0.6	0	0	0	0
Rb	Gd	Ti	O	1	3	2	4	-2	1.72	1.107	1.4135	0.605	1.4	0.992242	3.82047	YES	0.613	0	0	0	0
Cs	Eu	Ti	O	1	3	2	4	-2	1.88	0.947	1.4135	0.605	1.4	0.992242	3.82047	YES	0.933	0	0	0	0
K	Pr	Ti	O	1	3	2	4	-2	1.64	1.179	1.4095	0.605	1.4	0.990831	3.82329	YES	0.461	0	0	0	0
Rb	Tb	Ti	O	1	3	2	4	-2	1.72	1.095	1.4075	0.605	1.4	0.990126	3.82472	YES	0.625	0	0	0	0
K	Bi	Ti	O	1	3	2	4	-2	1.64	1.17	1.405	0.605	1.4	0.989244	3.82654	YES	0.47	Perovskite	0	0	0
Rb	Dy	Ti	O	1	3	2	4	-2	1.72	1.083	1.4015	0.605	1.4	0.98801	3.82914	YES	0.637	0	0	0	0
Ba	Pb	Ti	O	2	2	0	4	-2	1.61	1.19	1.4	0.605	1.4	0.987481	3.83026	YES	0.42	Perovskite	0	0	0
Rb	Y	Ti	O	1	3	2	4	-2	1.72	1.075	1.3975	0.605	1.4	0.986599	3.83217	YES	0.645	0	0	0	0
Rb	Er	Ti	O	1	3	2	4	-2	1.72	1.062	1.391	0.605	1.4	0.984307	3.83726	YES	0.658	0	0	0	0
Ba	Eu	Ti	O	2	2	0	4	-2	1.61	1.17	1.39	0.605	1.4	0.983954	3.83806	YES	0.44	0	0	0	0
Ca	Sr	Ti	O	2	2	0	4	-2	1.34	1.44	1.39	0.605	1.4	0.983954	3.83806	YES	0.1	Perovskite	0	0	0
Rb	Tm	Ti	O	1	3	2	4	-2	1.72	1.052	1.386	0.605	1.4	0.982543	3.84131	YES	0.668	0	0	0	0
Cs	Tl	Ti	O	1	3	2	4	-2	1.88	0.885	1.3825	0.605	1.4	0.981309	3.84422	YES	0.995	0	0	0	0
Rb	Yb	Ti	O	1	3	2	4	-2	1.72	1.042	1.381	0.605	1.4	0.98078	3.84549	YES	0.678	0	0	0	0
Cs	Sb	Ti	O	1	3	2	4	-2	1.88	0.76	1.32	0.605	1.4	0.959267	3.90732	YES	1.12	0	0	0	0
K	Ho	Ti	O	1	3	2	4	-2	1.64	1.12	1.38	0.605	1.4	0.980427	3.84634	YES	0.52	0	0	0	0
Ba	Sn	Ti	O	2	2	0	4	-2	1.61	1.15	1.38	0.605	1.4	0.980427	3.84634	YES	0.46	Perovskite (not A-site DP)	0	0	0
Rb	Lu	Ti	O	1	3	2	4	-2	1.72	1.032	1.376	0.605	1.4	0.979017	3.84979	YES	0.688	0	0	0	0
Sr	Cd	Ti	O	2	2	0	4	-2	1.44	1.31	1.375	0.605	1.4	0.978664	3.85067	YES	0.13	0	0	0	0
Cs	Sc	Ti	O	1	3	2	4	-2	1.88	0.87	1.375	0.605	1.4	0.978664	3.85067	YES	1.01	0	0	0	0
Na	La	Ti	O	1	3	2	4	-2	1.39	1.36	1.375	0.605	1.4	0.978664	3.85067	YES	0.03	Perovskite	0	0	0
K	Gd	Ti	O	1	3	2	4	-2	1.64	1.107	1.3735	0.605	1.4	0.978135	3.85199	YES	0.533	0	Non-Perovskite	0	0
K	Tb	Ti	O	1	3	2	4	-2	1.64	1.095	1.3675	0.605	1.4	0.976019	3.8574	YES	0.545	0	Non-Perovskite	0	0
Rb	Ce	Ti	O	1	3	2	4	-2	1.72	1.01	1.365	0.605	1.4	0.975137	3.85971	YES	0.71	0	0	0	0
Cs	Au	Ti	O	1	3	2	4	-2	1.88	0.85	1.365	0.605	1.4	0.975137	3.85971	YES	1.03	0	0	0	0
Au	La	Ti	O	1	3	2	4	-2	1.37	1.36	1.365	0.605	1.4	0.975137	3.85971	YES	0.01	0	0	0	0
K	Dy	Ti	O	1	3	2	4	-2	1.64	1.083	1.3615	0.605	1.4	0.973903	3.86299	YES	0.557	Perovskite	0	0	0
K	Y	Ti	O	1	3	2	4	-2	1.64	1.075	1.3575	0.605	1.4	0.972492	3.86683	YES	0.565	0	0	0	0
K	Er	Ti	O	1	3	2	4	-2	1.64	1.062	1.351	0.605	1.4	0.9702	3.87326	YES	0.578	0	0	0	0
K	Tm	Ti	O	1	3	2	4	-2	1.64	1.052	1.346	0.605	1.4	0.968437	3.87837	YES	0.588	0	0	0	0
K	Yb	Ti	O	1	3	2	4	-2	1.64	1.042	1.341	0.605	1.4	0.966673	3.88362	YES	0.598	0	0	0	0
Cs	In	Ti	O	1	3	2	4	-2	1.88	0.8	1.34	0.605	1.4	0.96632	3.88469	YES	1.08	0	0	0	0
K	Lu	Ti	O	1	3	2	4	-2	1.64	1.032	1.336	0.605	1.4	0.96491	3.88902	YES	0.608	0	0	0	0
Rb	Eu	Ti	O	1	3	2	4	-2	1.72	0.947	1.3335	0.605	1.4	0.964028	3.89177	YES	0.773	0	0	0	0
Na	Nd	Ti	O	1	3	2	4	-2	1.39	1.27	1.33	0.605	1.4	0.962794	3.89569	YES	0.12	Perovskite	0	0	0
Cs	Fe	Ti	O	1	3	2	4	-2	1.88	0.78	1.33	0.605	1.4	0.962794	3.89569	YES	1.1	0	Non-Perovskite	0	0
Ca	Cd	Ti	O	2	2	0	4	-2	1.34	1.31	1.325	0.605	1.4	0.96103	3.90143	YES	0.03	0	0	0	0
K	Ce	Ti	O	1	3	2	4	-2	1.64	1.01	1.325	0.605	1.4	0.96103	3.90143	YES	0.63	Perovskite	0	0	0
K	Cs	Nb	O	1	1	0	5	-2	1.64	1.88	1.76	0.64	1.4	1.09532	3.90596	YES	0.24	0	0	0	0
Au	Nd	Ti	O	1	3	2	4	-2	1.37	1.27	1.32	0.605	1.4	0.959267	3.90732	YES	0.1	0	0	0	0
Ag	La	Ti	O	1	3	2	4	-2	1.28	1.36	1.32	0.605	1.4	0.959267	3.90732	YES	0.08	Perovskite	0	0	0
Rb	Cs	Nb	O	1	1	0	5	-2	1.72	1.88	1.8	0.64	1.4	1.10919	3.90733	YES	0.16	0	0	0	0
K	Rb	Nb	O	1	1	0	5	-2	1.64	1.72	1.68	0.64	1.4	1.06759	3.90748	YES	0.08	0	0	0	0
Cs	Au	Nb	O	1	1	0	5	-2	1.88	1.37	1.625	0.64	1.4	1.04853	3.91242	YES	0.51	0	0	0	0
Na	Cs	Nb	O	1	1	0	5	-2	1.39	1.88	1.635	0.64	1.4	1.05199	3.91125	YES	0.49	0	0	0	0
Na	Rb	Nb	O	1	1	0	5	-2	1.39	1.72	1.555	0.64	1.4	1.02426	3.92437	YES	0.33	0	0	0	0
Na	Sm	Ti	O	1	3	2	4	-2	1.39	1.24	1.315	0.605	1.4	0.957504	3.91337	YES	0.15	0	Non-Perovskite	0	0
Ba	Hg	Ti	O	2	2	0	4	-2	1.61	1.02	1.315	0.605	1.4	0.957504	3.91337	YES	0.59	0	0	0	0
Sr	Pb	Ti	O	2	2	0	4	-2	1.44	1.19	1.315	0.605	1.4	0.957504	3.91337	YES	0.25	0	0	0	0
Cs	Ag	Nb	O	1	1	0	5	-2	1.88	1.28	1.58	0.64	1.4	1.03293	3.91929	YES	0.6	0	0	0	0
Sr	Eu	Ti	O	2	2	0	4	-2	1.44	1.17	1.305	0.605	1.4	0.953977	3.92597	YES	0.27	0	0	0	0
Au	Sm	Ti	O	1	3	2	4	-2	1.37	1.24	1.305	0.605	1.4	0.953977	3.92597	YES	0.13	0	0	0	0
Rb	Au	Nb	O	1	1	0	5	-2	1.72	1.37	1.545	0.64	1.4	1.0208	3.92667	YES	0.35	0	0	0	0
Rb	Tl	Ti	O	1	3	2	4	-2	1.72	0.885	1.3025	0.605	1.4	0.953095	3.92922	YES	0.835	0	0	0	0
Cs	Nb	Ti	O	1	3	2	4	-2	1.88	0.72	1.3	0.605	1.4	0.952214	3.93252	YES	1.16	0	Non-Perovskite	0	0
Na	K	Nb	O	1	1	0	5	-2	1.39	1.64	1.515	0.64	1.4	1.0104	3.93461	YES	0.25	Perovskite	0	0	0
K	Au	Nb	O	1	1	0	5	-2	1.64	1.37	1.505	0.64	1.4	1.00693	3.93761	YES	0.27	0	0	0	0
Rb	Ag	Nb	O	1	1	0	5	-2	1.72	1.28	1.5	0.64	1.4	1.0052	3.93918	YES	0.44	0	0	0	0
Rb	Sc	Ti	O	1	3	2	4	-2	1.72	0.87	1.295	0.605	1.4	0.95045	3.93925	YES	0.85	0	0	0	0
Sr	Sn	Ti	O	2	2	0	4	-2	1.44	1.15	1.295	0.605	1.4	0.95045	3.93925	YES	0.29	0	0	0	0
K	Eu	Ti	O	1	3	2	4	-2	1.64	0.947	1.2935	0.605	1.4	0.949921	3.94131	YES	0.693	0	Non-Perovskite	0	0
Y	Tl	Ti	O	3	1	2	4	-2	1.075	1.5	1.2875	0.605	1.4	0.947805	3.94969	YES	0.425	0	0	0	0
Ba	Mn	Ti	O	2	2	0	4	-2	1.61	0.96	1.285	0.605	1.4	0.946924	3.95326	YES	0.65	Perovskite (not A-site DP)	0	0	0
Rb	Au	Ti	O	1	3	2	4	-2	1.72	0.85	1.285	0.605	1.4	0.946924	3.95326	YES	0.87	0	0	0	0
Cs	Mo	Ti	O	1	3	2	4	-2	1.88	0.69	1.285	0.605	1.4	0.946924	3.95326	YES	1.19	0	0	0	0
K	Ag	Nb	O	1	1	0	5	-2	1.64	1.28	1.46	0.64	1.4	0.991336	3.95358	YES	0.36	0	0	0	0
Na	Pr	Ti	O	1	3	2	4	-2	1.39	1.179	1.2845	0.605	1.4	0.946747	3.95398	YES	0.211	Perovskite	0	0	0
Cs	Ru	Ti	O	1	3	2	4	-2	1.88	0.68	1.28	0.605	1.4	0.94516	3.96054	YES	1.2	0	0	0	0
Cs	Ir	Ti	O	1	3	2	4	-2	1.88	0.68	1.28	0.605	1.4	0.94516	3.96054	YES	1.2	0	0	0	0
Na	Bi	Ti	O	1	3	2	4	-2	1.39	1.17	1.28	0.605	1.4	0.94516	3.96054	YES	0.22	Perovskite	0	0	0
Cs	Ti	Ti	O	1	3	2	4	-2	1.88	0.67	1.275	0.605	1.4	0.943397	3.96801	YES	1.21	0	Non-Perovskite	0	0
Ag	Nd	Ti	O	1	3	2	4	-2	1.28	1.27	1.275	0.605	1.4	0.943397	3.96801	YES	0.01	0	0	0	0
Au	Pr	Ti	O	1	3	2	4	-2	1.37	1.179	1.2745	0.605	1.4	0.94322	3.96877	YES	0.191	0	0	0	0
Cs	Rh	Ti	O	1	3	2	4	-2	1.88	0.665	1.2725	0.605	1.4	0.942515	3.97182	YES	1.215	0	0	0	0
Nd	Pb	Ti	O	2	2	0	4	-2	1.35	1.19	1.27	0.605	1.4	0.941633	3.97568	YES	0.16	0	0	0	0
Au	Bi	Ti	O	1	3	2	4	-2	1.37	1.17	1.27	0.605	1.4	0.941633	3.97568	YES	0.2	0	0	0	0
Li	Cs	Nb	O	1	1	0	5	-2	0.92	1.88	1.4	0.64	1.4	0.970539	3.9821	YES	0.96	0	0	0	0
Ca	Pb	Ti	O	2	2	0	4	-2	1.34	1.19	1.265	0.605	1.4	0.93987	3.98355	YES	0.15	Perovskite	0	0	0
Ba	Fe	Ti	O	2	2	0	4	-2	1.61	0.92	1.265	0.605	1.4	0.93987	3.98355	YES	0.69	Perovskite (not A-site DP)	0	0	0
K	Tl	Ti	O	1	3	2	4	-2	1.64	0.885	1.2625	0.605	1.4	0.938988	3.98756	YES	0.755	0	0	0	0
Cs	Mn	Ti	O	1	3	2	4	-2	1.88	0.645	1.2625	0.605	1.4	0.938988	3.98756	YES	1.235	0	0	0	0
Rb	In	Ti	O	1	3	2	4	-2	1.72	0.8	1.26	0.605	1.4	0.938107	3.99163	YES	0.92	0	0	0	0
Nd	Eu	Ti	O	2	2	0	4	-2	1.35	1.17	1.26	0.605	1.4	0.938107	3.99163	YES	0.18	0	0	0	0
Cs	V	Ti	O	1	3	2	4	-2	1.88	0.64	1.26	0.605	1.4	0.938107	3.99163	YES	1.24	0	0	0	0
Ag	Sm	Ti	O	1	3	2	4	-2	1.28	1.24	1.26	0.605	1.4	0.938107	3.99163	YES	0.04	0	0	0	0
Na	Au	Nb	O	1	1	0	5	-2	1.39	1.37	1.38	0.64	1.4	0.963606	3.99376	YES	0.02	0	0	0	0
Na	Ho	Ti	O	1	3	2	4	-2	1.39	1.12	1.255	0.605	1.4	0.936343	3.99991	YES	0.27	Perovskite	0	0	0
K	Sc	Ti	O	1	3	2	4	-2	1.64	0.87	1.255	0.605	1.4	0.936343	3.99991	YES	0.77	0	Non-Perovskite	0	0
Ca	Eu	Ti	O	2	2	0	4	-2	1.34	1.17	1.255	0.605	1.4	0.936343	3.99991	YES	0.17	0	0	0	0
Ce	Tl	Ti	O	3	1	2	4	-2	1.01	1.5	1.255	0.605	1.4	0.936343	3.99991	YES	0.49	0	0	0	0
Sm	Pb	Ti	O	2	2	0	4	-2	1.32	1.19	1.255	0.605	1.4	0.936343	3.99991	YES	0.13	0	0	0	0
Ba	Co	Ti	O	2	2	0	4	-2	1.61	0.9	1.255	0.605	1.4	0.936343	3.99991	YES	0.71	Perovskite (not A-site DP)	0	0	0
Rb	Fe	Ti	O	1	3	2	4	-2	1.72	0.78	1.25	0.605	1.4	0.93458	4.00841	YES	0.94	0	Non-Perovskite	0	0
Cd	Pb	Ti	O	2	2	0	4	-2	1.31	1.19	1.25	0.605	1.4	0.93458	4.00841	YES	0.12	0	0	0	0
Nd	Sn	Ti	O	2	2	0	4	-2	1.35	1.15	1.25	0.605	1.4	0.93458	4.00841	YES	0.2	0	0	0	0
Mg	Ba	Ti	O	2	2	0	4	-2	0.89	1.61	1.25	0.605	1.4	0.93458	4.00841	YES	0.72	Perovskite (not A-site DP)	0	0	0
Cs	Ga	Ti	O	1	3	2	4	-2	1.88	0.62	1.25	0.605	1.4	0.93458	4.00841	YES	1.26	0	Non-Perovskite	0	0
Na	Gd	Ti	O	1	3	2	4	-2	1.39	1.107	1.2485	0.605	1.4	0.934051	4.01101	YES	0.283	Perovskite	0	0	0
Cs	Cr	Ti	O	1	3	2	4	-2	1.88	0.615	1.2475	0.605	1.4	0.933698	4.01275	YES	1.265	0	0	0	0
K	Au	Ti	O	1	3	2	4	-2	1.64	0.85	1.245	0.605	1.4	0.932817	4.01714	YES	0.79	0	0	0	0
Cs	Co	Ti	O	1	3	2	4	-2	1.88	0.61	1.245	0.605	1.4	0.932817	4.01714	YES	1.27	0	0	0	0
Sm	Eu	Ti	O	2	2	0	4	-2	1.32	1.17	1.245	0.605	1.4	0.932817	4.01714	YES	0.15	0	0	0	0
Au	Ho	Ti	O	1	3	2	4	-2	1.37	1.12	1.245	0.605	1.4	0.932817	4.01714	YES	0.25	0	0	0	0
Ca	Sn	Ti	O	2	2	0	4	-2	1.34	1.15	1.245	0.605	1.4	0.932817	4.01714	YES	0.19	Perovskite (not A-site DP)	0	0	0
Na	Tb	Ti	O	1	3	2	4	-2	1.39	1.095	1.2425	0.605	1.4	0.931935	4.02158	YES	0.295	Perovskite	0	0	0
Na	Ag	Nb	O	1	1	0	5	-2	1.39	1.28	1.335	0.64	1.4	0.948008	4.02467	YES	0.11	0	Non-Perovskite	0	0
Rb	Sb	Ti	O	1	3	2	4	-2	1.72	0.76	1.24	0.605	1.4	0.931053	4.02608	YES	0.96	0	Non-Perovskite	0	0
Cd	Eu	Ti	O	2	2	0	4	-2	1.31	1.17	1.24	0.605	1.4	0.931053	4.02608	YES	0.14	0	0	0	0
Au	Gd	Ti	O	1	3	2	4	-2	1.37	1.107	1.2385	0.605	1.4	0.930524	4.02881	YES	0.263	0	0	0	0
Na	Dy	Ti	O	1	3	2	4	-2	1.39	1.083	1.2365	0.605	1.4	0.929819	4.03248	YES	0.307	Perovskite	0	0	0
Ag	Au	Nb	O	1	1	0	5	-2	1.28	1.37	1.325	0.64	1.4	0.944542	4.03251	YES	0.09	0	0	0	0
Cs	Cu	Nb	O	1	1	0	5	-2	1.88	0.77	1.325	0.64	1.4	0.944542	4.03251	YES	1.11	0	0	0	0
Sm	Sn	Ti	O	2	2	0	4	-2	1.32	1.15	1.235	0.605	1.4	0.92929	4.03526	YES	0.17	0	0	0	0
Ba	Ti	Ti	O	2	2	0	4	-2	1.61	0.86	1.235	0.605	1.4	0.92929	4.03526	YES	0.75	Perovskite (not A-site DP)	0	0	0
Ba	Pd	Ti	O	2	2	0	4	-2	1.61	0.86	1.235	0.605	1.4	0.92929	4.03526	YES	0.75	0	0	0	0
Li	Rb	Nb	O	1	1	0	5	-2	0.92	1.72	1.32	0.64	1.4	0.942809	4.03658	YES	0.8	0	0	0	0
Na	Y	Ti	O	1	3	2	4	-2	1.39	1.075	1.2325	0.605	1.4	0.928408	4.03994	YES	0.315	Perovskite	0	0	0
Au	Tb	Ti	O	1	3	2	4	-2	1.37	1.095	1.2325	0.605	1.4	0.928408	4.03994	YES	0.275	0	0	0	0
Sr	Hg	Ti	O	2	2	0	4	-2	1.44	1.02	1.23	0.605	1.4	0.927527	4.04468	YES	0.42	0	0	0	0
Cd	Sn	Ti	O	2	2	0	4	-2	1.31	1.15	1.23	0.605	1.4	0.927527	4.04468	YES	0.16	0	0	0	0
Cs	As	Ti	O	1	3	2	4	-2	1.88	0.58	1.23	0.605	1.4	0.927527	4.04468	YES	1.3	0	Non-Perovskite	0	0
Ag	Pr	Ti	O	1	3	2	4	-2	1.28	1.179	1.2295	0.605	1.4	0.92735	4.04563	YES	0.101	0	0	0	0
Au	Dy	Ti	O	1	3	2	4	-2	1.37	1.083	1.2265	0.605	1.4	0.926292	4.05141	YES	0.287	0	0	0	0
Na	Er	Ti	O	1	3	2	4	-2	1.39	1.062	1.226	0.605	1.4	0.926116	4.05239	YES	0.328	Perovskite	0	0	0
Ag	Bi	Ti	O	1	3	2	4	-2	1.28	1.17	1.225	0.605	1.4	0.925763	4.05434	YES	0.11	Perovskite	0	0	0
Eu	Tl	Ti	O	3	1	2	4	-2	0.947	1.5	1.2235	0.605	1.4	0.925234	4.05728	YES	0.553	0	0	0	0
Y	Au	Ti	O	3	1	2	4	-2	1.075	1.37	1.2225	0.605	1.4	0.924882	4.05926	YES	0.295	0	0	0	0
Na	Tm	Ti	O	1	3	2	4	-2	1.39	1.052	1.221	0.605	1.4	0.924353	4.06224	YES	0.338	Perovskite	0	0	0
Rb	Nb	Ti	O	1	3	2	4	-2	1.72	0.72	1.22	0.605	1.4	0.924	4.06424	YES	1	0	Non-Perovskite	0	0
Rb	Ta	Ti	O	1	3	2	4	-2	1.72	0.72	1.22	0.605	1.4	0.924	4.06424	YES	1	0	Non-Perovskite	0	0
K	In	Ti	O	1	3	2	4	-2	1.64	0.8	1.22	0.605	1.4	0.924	4.06424	YES	0.84	0	0	0	0
Na	Yb	Ti	O	1	3	2	4	-2	1.39	1.042	1.216	0.605	1.4	0.922589	4.07235	YES	0.348	Perovskite	0	0	0
Au	Er	Ti	O	1	3	2	4	-2	1.37	1.062	1.216	0.605	1.4	0.922589	4.07235	YES	0.308	0	0	0	0
Li	K	Nb	O	1	1	0	5	-2	0.92	1.64	1.28	0.64	1.4	0.928944	4.07289	YES	0.72	0	Non-Perovskite	0	0
Au	Tm	Ti	O	1	3	2	4	-2	1.37	1.052	1.211	0.605	1.4	0.920826	4.08272	YES	0.318	0	0	0	0
Na	Lu	Ti	O	1	3	2	4	-2	1.39	1.032	1.211	0.605	1.4	0.920826	4.08272	YES	0.358	Perovskite	0	0	0
K	Fe	Ti	O	1	3	2	4	-2	1.64	0.78	1.21	0.605	1.4	0.920473	4.08483	YES	0.86	0	Non-Perovskite	0	0
Cs	Cu	Ti	O	1	3	2	4	-2	1.88	0.54	1.21	0.605	1.4	0.920473	4.08483	YES	1.34	0	0	0	0
Cs	Al	Ti	O	1	3	2	4	-2	1.88	0.535	1.2075	0.605	1.4	0.919591	4.09014	YES	1.345	0	Non-Perovskite	0	0
Au	Yb	Ti	O	1	3	2	4	-2	1.37	1.042	1.206	0.605	1.4	0.919062	4.09336	YES	0.328	0	0	0	0
Rb	Mo	Ti	O	1	3	2	4	-2	1.72	0.69	1.205	0.605	1.4	0.91871	4.09552	YES	1.03	0	0	0	0
Ba	Cr	Ti	O	2	2	0	4	-2	1.61	0.8	1.205	0.605	1.4	0.91871	4.09552	YES	0.81	Perovskite (not A-site DP)	0	0	0
Ba	Pt	Ti	O	2	2	0	4	-2	1.61	0.8	1.205	0.605	1.4	0.91871	4.09552	YES	0.81	0	Non-Perovskite	0	0
Au	Lu	Ti	O	1	3	2	4	-2	1.37	1.032	1.201	0.605	1.4	0.917299	4.10427	YES	0.338	0	0	0	0
Na	Ce	Ti	O	1	3	2	4	-2	1.39	1.01	1.2	0.605	1.4	0.916946	4.10649	YES	0.38	Perovskite	0	0	0
Rb	Ru	Ti	O	1	3	2	4	-2	1.72	0.68	1.2	0.605	1.4	0.916946	4.10649	YES	1.04	0	0	0	0
Rb	Ir	Ti	O	1	3	2	4	-2	1.72	0.68	1.2	0.605	1.4	0.916946	4.10649	YES	1.04	0	0	0	0
K	Sb	Ti	O	1	3	2	4	-2	1.64	0.76	1.2	0.605	1.4	0.916946	4.10649	YES	0.88	0	Non-Perovskite	0	0
Sr	Mn	Ti	O	2	2	0	4	-2	1.44	0.96	1.2	0.605	1.4	0.916946	4.10649	YES	0.48	Perovskite (not A-site DP)	0	0	0
Ba	V	Ti	O	2	2	0	4	-2	1.61	0.79	1.2	0.605	1.4	0.916946	4.10649	YES	0.82	0	Non-Perovskite	0	0
Ag	Ho	Ti	O	1	3	2	4	-2	1.28	1.12	1.2	0.605	1.4	0.916946	4.10649	YES	0.16	0	0	0	0
Rb	Cu	Nb	O	1	1	0	5	-2	1.72	0.77	1.245	0.64	1.4	0.916812	4.11092	YES	0.95	0	0	0	0
Rb	Ti	Ti	O	1	3	2	4	-2	1.72	0.67	1.195	0.605	1.4	0.915183	4.11774	YES	1.05	0	Non-Perovskite	0	0
Ag	Gd	Ti	O	1	3	2	4	-2	1.28	1.107	1.1935	0.605	1.4	0.914654	4.12117	YES	0.173	0	0	0	0
Rb	Rh	Ti	O	1	3	2	4	-2	1.72	0.665	1.1925	0.605	1.4	0.914301	4.12347	YES	1.055	0	0	0	0
Dy	Pb	Ti	O	2	2	0	4	-2	1.19	1.19	1.19	0.605	1.4	0.91342	4.12927	YES	0	0	0	0	0
Au	Ce	Ti	O	1	3	2	4	-2	1.37	1.01	1.19	0.605	1.4	0.91342	4.12927	YES	0.36	0	0	0	0
Ag	Tb	Ti	O	1	3	2	4	-2	1.28	1.095	1.1875	0.605	1.4	0.912538	4.13515	YES	0.185	0	0	0	0
Sc	Tl	Ti	O	3	1	2	4	-2	0.87	1.5	1.185	0.605	1.4	0.911656	4.14111	YES	0.63	0	0	0	0
Hg	Nd	Ti	O	2	2	0	4	-2	1.02	1.35	1.185	0.605	1.4	0.911656	4.14111	YES	0.33	0	0	0	0
Rb	Mn	Ti	O	1	3	2	4	-2	1.72	0.645	1.1825	0.605	1.4	0.910775	4.14714	YES	1.075	0	Non-Perovskite	0	0
Ag	Dy	Ti	O	1	3	2	4	-2	1.28	1.083	1.1815	0.605	1.4	0.910422	4.14958	YES	0.197	0	0	0	0
Ca	Hg	Ti	O	2	2	0	4	-2	1.34	1.02	1.18	0.605	1.4	0.909893	4.15325	YES	0.32	0	0	0	0
K	Nb	Ti	O	1	3	2	4	-2	1.64	0.72	1.18	0.605	1.4	0.909893	4.15325	YES	0.92	0	Non-Perovskite	0	0
Rb	V	Ti	O	1	3	2	4	-2	1.72	0.64	1.18	0.605	1.4	0.909893	4.15325	YES	1.08	0	0	0	0
K	Ta	Ti	O	1	3	2	4	-2	1.64	0.72	1.18	0.605	1.4	0.909893	4.15325	YES	0.92	0	Non-Perovskite	0	0
Eu	Dy	Ti	O	2	2	0	4	-2	1.17	1.19	1.18	0.605	1.4	0.909893	4.15325	YES	0.02	0	Non-Perovskite	0	0
Eu	Pb	Ti	O	2	2	0	4	-2	1.17	1.19	1.18	0.605	1.4	0.909893	4.15325	YES	0.02	0	0	0	0
Sr	Fe	Ti	O	2	2	0	4	-2	1.44	0.92	1.18	0.605	1.4	0.909893	4.15325	YES	0.52	Perovskite (not A-site DP)	0	0	0
Y	Ag	Ti	O	3	1	2	4	-2	1.075	1.28	1.1775	0.605	1.4	0.909011	4.15944	YES	0.205	0	0	0	0
K	Cu	Nb	O	1	1	0	5	-2	1.64	0.77	1.205	0.64	1.4	0.902948	4.16302	YES	0.87	0	0	0	0
Ba	Zn	Ti	O	2	2	0	4	-2	1.61	0.74	1.175	0.605	1.4	0.90813	4.1657	YES	0.87	0	Non-Perovskite	0	0
Au	Tl	Ti	O	3	1	2	4	-2	0.85	1.5	1.175	0.605	1.4	0.90813	4.1657	YES	0.65	0	0	0	0
Ag	Er	Ti	O	1	3	2	4	-2	1.28	1.062	1.171	0.605	1.4	0.906719	4.1759	YES	0.218	0	0	0	0
Rb	Ga	Ti	O	1	3	2	4	-2	1.72	0.62	1.17	0.605	1.4	0.906366	4.17848	YES	1.1	0	Non-Perovskite	0	0
Sr	Co	Ti	O	2	2	0	4	-2	1.44	0.9	1.17	0.605	1.4	0.906366	4.17848	YES	0.54	Perovskite (not A-site DP)	0	0	0
Sn	Pb	Ti	O	2	2	0	4	-2	1.15	1.19	1.17	0.605	1.4	0.906366	4.17848	YES	0.04	0	0	0	0
Dy	Sn	Ti	O	2	2	0	4	-2	1.19	1.15	1.17	0.605	1.4	0.906366	4.17848	YES	0.04	0	0	0	0
Hg	Sm	Ti	O	2	2	0	4	-2	1.02	1.32	1.17	0.605	1.4	0.906366	4.17848	YES	0.3	0	0	0	0
Ba	Cu	Ti	O	2	2	0	4	-2	1.61	0.73	1.17	0.605	1.4	0.906366	4.17848	YES	0.88	0	Non-Perovskite	0	0
Ba	Ge	Ti	O	2	2	0	4	-2	1.61	0.73	1.17	0.605	1.4	0.906366	4.17848	YES	0.88	0	Non-Perovskite	0	0
Na	Eu	Ti	O	1	3	2	4	-2	1.39	0.947	1.1685	0.605	1.4	0.905837	4.18237	NO	0.443	0	0	0	Perovskite
Rb	Cr	Ti	O	1	3	2	4	-2	1.72	0.615	1.1675	0.605	1.4	0.905485	4.18499	NO	1.105	0	0	0	0
Ag	Tm	Ti	O	1	3	2	4	-2	1.28	1.052	1.166	0.605	1.4	0.904956	4.18893	NO	0.228	0	0	0	0
Rb	Co	Ti	O	1	3	2	4	-2	1.72	0.61	1.165	0.605	1.4	0.904603	4.19158	NO	1.11	0	0	0	0
Cd	Hg	Ti	O	2	2	0	4	-2	1.31	1.02	1.165	0.605	1.4	0.904603	4.19158	NO	0.29	0	0	0	0
Yb	Pb	Ti	O	2	2	0	4	-2	1.14	1.19	1.165	0.605	1.4	0.904603	4.19158	NO	0.05	0	0	0	0
Mg	Sr	Ti	O	2	2	0	4	-2	0.89	1.44	1.165	0.605	1.4	0.904603	4.19158	NO	0.55	0	0	0	0
K	Mo	Ti	O	1	3	2	4	-2	1.64	0.69	1.165	0.605	1.4	0.904603	4.19158	NO	0.95	0	0	0	0
Ag	Yb	Ti	O	1	3	2	4	-2	1.28	1.042	1.161	0.605	1.4	0.903192	4.20231	NO	0.238	0	0	0	0
Eu	Sn	Ti	O	2	2	0	4	-2	1.17	1.15	1.16	0.605	1.4	0.90284	4.20502	NO	0.02	0	0	0	0
K	Ru	Ti	O	1	3	2	4	-2	1.64	0.68	1.16	0.605	1.4	0.90284	4.20502	NO	0.96	0	0	0	0
K	Ir	Ti	O	1	3	2	4	-2	1.64	0.68	1.16	0.605	1.4	0.90284	4.20502	NO	0.96	0	0	0	0
Au	Eu	Ti	O	1	3	2	4	-2	1.37	0.947	1.1585	0.605	1.4	0.902311	4.20912	NO	0.423	0	0	0	0
Ag	Lu	Ti	O	1	3	2	4	-2	1.28	1.032	1.156	0.605	1.4	0.901429	4.21603	NO	0.248	0	0	0	0
Mn	Nd	Ti	O	2	2	0	4	-2	0.96	1.35	1.155	0.605	1.4	0.901076	4.21882	NO	0.39	0	0	0	0
K	Ti	Ti	O	1	3	2	4	-2	1.64	0.67	1.155	0.605	1.4	0.901076	4.21882	NO	0.97	0	0	Non-Perovskite	0
Eu	Yb	Ti	O	2	2	0	4	-2	1.17	1.14	1.155	0.605	1.4	0.901076	4.21882	NO	0.03	0	0	0	0
K	Rh	Ti	O	1	3	2	4	-2	1.64	0.665	1.1525	0.605	1.4	0.900195	4.22584	NO	0.975	0	0	0	0
Rb	As	Ti	O	1	3	2	4	-2	1.72	0.58	1.15	0.605	1.4	0.899313	4.23297	NO	1.14	0	0	Non-Perovskite	0
Ca	Mn	Ti	O	2	2	0	4	-2	1.34	0.96	1.15	0.605	1.4	0.899313	4.23297	NO	0.38	0	0	0	Perovskite
Sr	Ti	Ti	O	2	2	0	4	-2	1.44	0.86	1.15	0.605	1.4	0.899313	4.23297	NO	0.58	0	0	0	Perovskite (not A-site DP)
Sr	Pd	Ti	O	2	2	0	4	-2	1.44	0.86	1.15	0.605	1.4	0.899313	4.23297	NO	0.58	0	0	0	0
Ba	Ni	Ti	O	2	2	0	4	-2	1.61	0.69	1.15	0.605	1.4	0.899313	4.23297	NO	0.92	0	0	Non-Perovskite	0
Li	Na	Nb	O	1	1	0	5	-2	0.92	1.39	1.155	0.64	1.4	0.885617	4.24429	NO	0.47	0	0	0	Perovskite
Yb	Sn	Ti	O	2	2	0	4	-2	1.14	1.15	1.145	0.605	1.4	0.89755	4.24748	NO	0.01	0	0	0	0
Ag	Ce	Ti	O	1	3	2	4	-2	1.28	1.01	1.145	0.605	1.4	0.89755	4.24748	NO	0.27	0	0	0	0
K	Mn	Ti	O	1	3	2	4	-2	1.64	0.645	1.1425	0.605	1.4	0.896668	4.25488	NO	0.995	0	0	Non-Perovskite	0
Mn	Sm	Ti	O	2	2	0	4	-2	0.96	1.32	1.14	0.605	1.4	0.895786	4.26238	NO	0.36	0	0	0	Perovskite (not A-site DP)
Tm	Pb	Ti	O	2	2	0	4	-2	1.09	1.19	1.14	0.605	1.4	0.895786	4.26238	NO	0.1	0	0	0	0
Li	La	Ti	O	1	3	2	4	-2	0.92	1.36	1.14	0.605	1.4	0.895786	4.26238	NO	0.44	0	0	0	Perovskite
Fe	Tl	Ti	O	3	1	2	4	-2	0.78	1.5	1.14	0.605	1.4	0.895786	4.26238	NO	0.72	0	0	0	0
K	V	Ti	O	1	3	2	4	-2	1.64	0.64	1.14	0.605	1.4	0.895786	4.26238	NO	1	0	0	Non-Perovskite	0
Li	Au	Nb	O	1	1	0	5	-2	0.92	1.37	1.145	0.64	1.4	0.88215	4.26312	NO	0.45	0	0	0	0
Na	Tl	Ti	O	1	3	2	4	-2	1.39	0.885	1.1375	0.605	1.4	0.894904	4.26997	NO	0.505	0	0	0	Perovskite
Mn	Cd	Ti	O	2	2	0	4	-2	0.96	1.31	1.135	0.605	1.4	0.894023	4.27767	NO	0.35	0	0	0	0
Fe	Nd	Ti	O	2	2	0	4	-2	0.92	1.35	1.135	0.605	1.4	0.894023	4.27767	NO	0.43	0	0	Non-Perovskite	0
Ca	Fe	Ti	O	2	2	0	4	-2	1.34	0.92	1.13	0.605	1.4	0.892259	4.29335	NO	0.42	0	0	0	Perovskite
Na	Sc	Ti	O	1	3	2	4	-2	1.39	0.87	1.13	0.605	1.4	0.892259	4.29335	NO	0.52	0	0	Non-Perovskite	0
Rb	Cu	Ti	O	1	3	2	4	-2	1.72	0.54	1.13	0.605	1.4	0.892259	4.29335	NO	1.18	0	0	Non-Perovskite	0
Eu	Tm	Ti	O	2	2	0	4	-2	1.17	1.09	1.13	0.605	1.4	0.892259	4.29335	NO	0.08	0	0	0	0
K	Ga	Ti	O	1	3	2	4	-2	1.64	0.62	1.13	0.605	1.4	0.892259	4.29335	NO	1.02	0	0	Non-Perovskite	0
Sb	Tl	Ti	O	3	1	2	4	-2	0.76	1.5	1.13	0.605	1.4	0.892259	4.29335	NO	0.74	0	0	0	0
Rb	Al	Ti	O	1	3	2	4	-2	1.72	0.535	1.1275	0.605	1.4	0.891378	4.30135	NO	1.185	0	0	Non-Perovskite	0
K	Cr	Ti	O	1	3	2	4	-2	1.64	0.615	1.1275	0.605	1.4	0.891378	4.30135	NO	1.025	0	0	Non-Perovskite	0
Au	Tl	Ti	O	1	3	2	4	-2	1.37	0.885	1.1275	0.605	1.4	0.891378	4.30135	NO	0.485	0	0	0	0
Co	Nd	Ti	O	2	2	0	4	-2	0.9	1.35	1.125	0.605	1.4	0.890496	4.30945	NO	0.45	0	0	0	Perovskite (not A-site DP)
K	Co	Ti	O	1	3	2	4	-2	1.64	0.61	1.125	0.605	1.4	0.890496	4.30945	NO	1.03	0	0	Non-Perovskite	0
Na	Au	Ti	O	1	3	2	4	-2	1.39	0.85	1.12	0.605	1.4	0.888733	4.32598	NO	0.54	0	0	0	0
Sc	Au	Ti	O	3	1	2	4	-2	0.87	1.37	1.12	0.605	1.4	0.888733	4.32598	NO	0.5	0	0	0	0
Fe	Sm	Ti	O	2	2	0	4	-2	0.92	1.32	1.12	0.605	1.4	0.888733	4.32598	NO	0.4	0	0	0	0
Ca	Co	Ti	O	2	2	0	4	-2	1.34	0.9	1.12	0.605	1.4	0.888733	4.32598	NO	0.44	0	0	0	0
Tm	Sn	Ti	O	2	2	0	4	-2	1.09	1.15	1.12	0.605	1.4	0.888733	4.32598	NO	0.06	0	0	0	0
Sr	Cr	Ti	O	2	2	0	4	-2	1.44	0.8	1.12	0.605	1.4	0.888733	4.32598	NO	0.64	0	0	0	0
Sr	Pt	Ti	O	2	2	0	4	-2	1.44	0.8	1.12	0.605	1.4	0.888733	4.32598	NO	0.64	0	0	0	0
Fe	Cd	Ti	O	2	2	0	4	-2	0.92	1.31	1.115	0.605	1.4	0.886969	4.34294	NO	0.39	0	0	0	0
Mg	Ca	Ti	O	2	2	0	4	-2	0.89	1.34	1.115	0.605	1.4	0.886969	4.34294	NO	0.45	0	0	0	0
Sr	V	Ti	O	2	2	0	4	-2	1.44	0.79	1.115	0.605	1.4	0.886969	4.34294	NO	0.65	0	0	Non-Perovskite	0
Ag	Eu	Ti	O	1	3	2	4	-2	1.28	0.947	1.1135	0.605	1.4	0.88644	4.34812	NO	0.333	0	0	Non-Perovskite	0
K	As	Ti	O	1	3	2	4	-2	1.64	0.58	1.11	0.605	1.4	0.885206	4.36035	NO	1.06	0	0	Non-Perovskite	0
Nb	Tl	Ti	O	3	1	2	4	-2	0.72	1.5	1.11	0.605	1.4	0.885206	4.36035	NO	0.78	0	0	Non-Perovskite	0
Co	Sm	Ti	O	2	2	0	4	-2	0.9	1.32	1.11	0.605	1.4	0.885206	4.36035	NO	0.42	0	0	0	Perovskite (not A-site DP)
Li	Ag	Nb	O	1	1	0	5	-2	0.92	1.28	1.1	0.64	1.4	0.866552	4.36098	NO	0.36	0	0	0	Perovskite
Ti	Nd	Ti	O	2	2	0	4	-2	0.86	1.35	1.105	0.605	1.4	0.883443	4.37823	NO	0.49	0	0	0	Perovskite (not A-site DP)
Co	Cd	Ti	O	2	2	0	4	-2	0.9	1.31	1.105	0.605	1.4	0.883443	4.37823	NO	0.41	0	0	0	0
Pd	Nd	Ti	O	2	2	0	4	-2	0.86	1.35	1.105	0.605	1.4	0.883443	4.37823	NO	0.49	0	0	0	0
Hg	Dy	Ti	O	2	2	0	4	-2	1.02	1.19	1.105	0.605	1.4	0.883443	4.37823	NO	0.17	0	0	0	0
Hg	Pb	Ti	O	2	2	0	4	-2	1.02	1.19	1.105	0.605	1.4	0.883443	4.37823	NO	0.17	0	0	0	0
Mg	Cd	Ti	O	2	2	0	4	-2	0.89	1.31	1.1	0.605	1.4	0.881679	4.39658	NO	0.42	0	0	0	0
Ca	Ti	Ti	O	2	2	0	4	-2	1.34	0.86	1.1	0.605	1.4	0.881679	4.39658	NO	0.48	0	0	0	Perovskite (not A-site DP)
Ca	Pd	Ti	O	2	2	0	4	-2	1.34	0.86	1.1	0.605	1.4	0.881679	4.39658	NO	0.48	0	0	0	Perovskite
Na	Cu	Nb	O	1	1	0	5	-2	1.39	0.77	1.08	0.64	1.4	0.85962	4.41255	NO	0.62	0	0	0	0
Li	Nd	Ti	O	1	3	2	4	-2	0.92	1.27	1.095	0.605	1.4	0.879916	4.41543	NO	0.35	0	0	0	Perovskite
Na	In	Ti	O	1	3	2	4	-2	1.39	0.8	1.095	0.605	1.4	0.879916	4.41543	NO	0.59	0	0	0	0
Hg	Eu	Ti	O	2	2	0	4	-2	1.02	1.17	1.095	0.605	1.4	0.879916	4.41543	NO	0.15	0	0	0	0
Mo	Tl	Ti	O	3	1	2	4	-2	0.69	1.5	1.095	0.605	1.4	0.879916	4.41543	NO	0.81	0	0	0	0
Ti	Sm	Ti	O	2	2	0	4	-2	0.86	1.32	1.09	0.605	1.4	0.878153	4.43479	NO	0.46	0	0	0	Perovskite (not A-site DP)
Pd	Sm	Ti	O	2	2	0	4	-2	0.86	1.32	1.09	0.605	1.4	0.878153	4.43479	NO	0.46	0	0	0	0
Ru	Tl	Ti	O	3	1	2	4	-2	0.68	1.5	1.09	0.605	1.4	0.878153	4.43479	NO	0.82	0	0	0	0
Ir	Tl	Ti	O	3	1	2	4	-2	0.68	1.5	1.09	0.605	1.4	0.878153	4.43479	NO	0.82	0	0	0	0
K	Cu	Ti	O	1	3	2	4	-2	1.64	0.54	1.09	0.605	1.4	0.878153	4.43479	NO	1.1	0	0	0	0
Sr	Zn	Ti	O	2	2	0	4	-2	1.44	0.74	1.09	0.605	1.4	0.878153	4.43479	NO	0.7	0	0	0	0
K	Al	Ti	O	1	3	2	4	-2	1.64	0.535	1.0875	0.605	1.4	0.877271	4.44466	NO	1.105	0	0	Non-Perovskite	0
Na	Fe	Ti	O	1	3	2	4	-2	1.39	0.78	1.085	0.605	1.4	0.876389	4.45467	NO	0.61	0	0	Non-Perovskite	0
Ti	Cd	Ti	O	2	2	0	4	-2	0.86	1.31	1.085	0.605	1.4	0.876389	4.45467	NO	0.45	0	0	0	Perovskite (not A-site DP)
Ti	Tl	Ti	O	3	1	2	4	-2	0.67	1.5	1.085	0.605	1.4	0.876389	4.45467	NO	0.83	0	0	Non-Perovskite	0
Sr	Cu	Ti	O	2	2	0	4	-2	1.44	0.73	1.085	0.605	1.4	0.876389	4.45467	NO	0.71	0	0	0	Perovskite
Sr	Ge	Ti	O	2	2	0	4	-2	1.44	0.73	1.085	0.605	1.4	0.876389	4.45467	NO	0.71	0	0	Non-Perovskite	0
Pd	Cd	Ti	O	2	2	0	4	-2	0.86	1.31	1.085	0.605	1.4	0.876389	4.45467	NO	0.45	0	0	0	0
Au	In	Ti	O	1	3	2	4	-2	1.37	0.8	1.085	0.605	1.4	0.876389	4.45467	NO	0.57	0	0	0	0
Hg	Sn	Ti	O	2	2	0	4	-2	1.02	1.15	1.085	0.605	1.4	0.876389	4.45467	NO	0.13	0	0	0	0
Ag	Tl	Ti	O	1	3	2	4	-2	1.28	0.885	1.0825	0.605	1.4	0.875508	4.46481	NO	0.395	0	0	0	0
Li	Sm	Ti	O	1	3	2	4	-2	0.92	1.24	1.08	0.605	1.4	0.874626	4.47509	NO	0.32	0	0	Non-Perovskite	0
Hg	Yb	Ti	O	2	2	0	4	-2	1.02	1.14	1.08	0.605	1.4	0.874626	4.47509	NO	0.12	0	0	0	0
Mn	Dy	Ti	O	2	2	0	4	-2	0.96	1.19	1.075	0.605	1.4	0.872862	4.49607	NO	0.23	0	0	0	Perovskite ( A- and B-site DP)
Na	Sb	Ti	O	1	3	2	4	-2	1.39	0.76	1.075	0.605	1.4	0.872862	4.49607	NO	0.63	0	0	Non-Perovskite	0
Mn	Pb	Ti	O	2	2	0	4	-2	0.96	1.19	1.075	0.605	1.4	0.872862	4.49607	NO	0.23	0	0	0	0
Cs	B	Ti	O	1	3	2	4	-2	1.88	0.27	1.075	0.605	1.4	0.872862	4.49607	NO	1.61	0	0	0	0
Sc	Ag	Ti	O	3	1	2	4	-2	0.87	1.28	1.075	0.605	1.4	0.872862	4.49607	NO	0.41	0	0	0	0
Cr	Nd	Ti	O	2	2	0	4	-2	0.8	1.35	1.075	0.605	1.4	0.872862	4.49607	NO	0.55	0	0	Non-Perovskite	0
Pt	Nd	Ti	O	2	2	0	4	-2	0.8	1.35	1.075	0.605	1.4	0.872862	4.49607	NO	0.55	0	0	0	0
Fe	Au	Ti	O	3	1	2	4	-2	0.78	1.37	1.075	0.605	1.4	0.872862	4.49607	NO	0.59	0	0	0	0
Mn	Tl	Ti	O	3	1	2	4	-2	0.645	1.5	1.0725	0.605	1.4	0.871981	4.50678	NO	0.855	0	0	0	0
Ca	Cr	Ti	O	2	2	0	4	-2	1.34	0.8	1.07	0.605	1.4	0.871099	4.51763	NO	0.54	0	0	0	Perovskite (not A-site DP)
V	Nd	Ti	O	2	2	0	4	-2	0.79	1.35	1.07	0.605	1.4	0.871099	4.51763	NO	0.56	0	0	0	0
Ca	Pt	Ti	O	2	2	0	4	-2	1.34	0.8	1.07	0.605	1.4	0.871099	4.51763	NO	0.54	0	0	0	0
V	Tl	Ti	O	3	1	2	4	-2	0.64	1.5	1.07	0.605	1.4	0.871099	4.51763	NO	0.86	0	0	0	0
Mn	Eu	Ti	O	2	2	0	4	-2	0.96	1.17	1.065	0.605	1.4	0.869336	4.53978	NO	0.21	0	0	0	0
Ca	V	Ti	O	2	2	0	4	-2	1.34	0.79	1.065	0.605	1.4	0.869336	4.53978	NO	0.55	0	0	0	Perovskite (not A-site DP)
Cu	La	Ti	O	1	3	2	4	-2	0.77	1.36	1.065	0.605	1.4	0.869336	4.53978	NO	0.59	0	0	0	Perovskite (not A-site DP)
Sr	Ni	Ti	O	2	2	0	4	-2	1.44	0.69	1.065	0.605	1.4	0.869336	4.53978	NO	0.75	0	0	0	0
Au	Sb	Ti	O	1	3	2	4	-2	1.37	0.76	1.065	0.605	1.4	0.869336	4.53978	NO	0.61	0	0	0	0
Ag	Au	Ti	O	1	3	2	4	-2	1.28	0.85	1.065	0.605	1.4	0.869336	4.53978	NO	0.43	0	0	0	0
Cr	Sm	Ti	O	2	2	0	4	-2	0.8	1.32	1.06	0.605	1.4	0.867572	4.56255	NO	0.52	0	0	0	0
Pt	Sm	Ti	O	2	2	0	4	-2	0.8	1.32	1.06	0.605	1.4	0.867572	4.56255	NO	0.52	0	0	0	0
Ga	Tl	Ti	O	3	1	2	4	-2	0.62	1.5	1.06	0.605	1.4	0.867572	4.56255	NO	0.88	0	0	0	0
Cr	Tl	Ti	O	3	1	2	4	-2	0.615	1.5	1.0575	0.605	1.4	0.866691	4.57417	NO	0.885	0	0	0	0
V	Sm	Ti	O	2	2	0	4	-2	0.79	1.32	1.055	0.605	1.4	0.865809	4.58595	NO	0.53	0	0	0	0
Cr	Cd	Ti	O	2	2	0	4	-2	0.8	1.31	1.055	0.605	1.4	0.865809	4.58595	NO	0.51	0	0	0	0
Cd	Pt	Ti	O	2	2	0	4	-2	1.31	0.8	1.055	0.605	1.4	0.865809	4.58595	NO	0.51	0	0	0	0
Hg	Tm	Ti	O	2	2	0	4	-2	1.02	1.09	1.055	0.605	1.4	0.865809	4.58595	NO	0.07	0	0	0	0
Na	Nb	Ti	O	1	3	2	4	-2	1.39	0.72	1.055	0.605	1.4	0.865809	4.58595	NO	0.67	0	0	0	0
Fe	Dy	Ti	O	2	2	0	4	-2	0.92	1.19	1.055	0.605	1.4	0.865809	4.58595	NO	0.27	0	0	0	0
Na	Ta	Ti	O	1	3	2	4	-2	1.39	0.72	1.055	0.605	1.4	0.865809	4.58595	NO	0.67	0	0	0	0
Mn	Sn	Ti	O	2	2	0	4	-2	0.96	1.15	1.055	0.605	1.4	0.865809	4.58595	NO	0.19	0	0	0	0
Fe	Pb	Ti	O	2	2	0	4	-2	0.92	1.19	1.055	0.605	1.4	0.865809	4.58595	NO	0.27	0	0	0	0
Co	Tl	Ti	O	3	1	2	4	-2	0.61	1.5	1.055	0.605	1.4	0.865809	4.58595	NO	0.89	0	0	0	0
Cu	Ag	Nb	O	1	1	0	5	-2	0.77	1.28	1.025	0.64	1.4	0.840556	4.58799	NO	0.51	0	0	0	0
V	Cd	Ti	O	2	2	0	4	-2	0.79	1.31	1.05	0.605	1.4	0.864046	4.61002	NO	0.52	0	0	0	0
Mn	Yb	Ti	O	2	2	0	4	-2	0.96	1.14	1.05	0.605	1.4	0.864046	4.61002	NO	0.18	0	0	0	0
Li	Pr	Ti	O	1	3	2	4	-2	0.92	1.179	1.0495	0.605	1.4	0.863869	4.61246	NO	0.259	0	0	0	0
Fe	Eu	Ti	O	2	2	0	4	-2	0.92	1.17	1.045	0.605	1.4	0.862282	4.63476	NO	0.25	0	0	0	0
Co	Dy	Ti	O	2	2	0	4	-2	0.9	1.19	1.045	0.605	1.4	0.862282	4.63476	NO	0.29	0	0	0	0
Co	Pb	Ti	O	2	2	0	4	-2	0.9	1.19	1.045	0.605	1.4	0.862282	4.63476	NO	0.29	0	0	0	0
Nb	Au	Ti	O	3	1	2	4	-2	0.72	1.37	1.045	0.605	1.4	0.862282	4.63476	NO	0.65	0	0	0	0
Li	Bi	Ti	O	1	3	2	4	-2	0.92	1.17	1.045	0.605	1.4	0.862282	4.63476	NO	0.25	0	0	0	0
Na	Mo	Ti	O	1	3	2	4	-2	1.39	0.69	1.04	0.605	1.4	0.860519	4.66021	NO	0.7	0	0	0	0
Nd	Ge	Ti	O	2	2	0	4	-2	1.35	0.73	1.04	0.605	1.4	0.860519	4.66021	NO	0.62	0	0	0	0
Mg	Pb	Ti	O	2	2	0	4	-2	0.89	1.19	1.04	0.605	1.4	0.860519	4.66021	NO	0.3	0	0	0	0
Ca	Zn	Ti	O	2	2	0	4	-2	1.34	0.74	1.04	0.605	1.4	0.860519	4.66021	NO	0.6	0	0	0	0
As	Tl	Ti	O	3	1	2	4	-2	0.58	1.5	1.04	0.605	1.4	0.860519	4.66021	NO	0.92	0	0	0	0
Ag	In	Ti	O	1	3	2	4	-2	1.28	0.8	1.04	0.605	1.4	0.860519	4.66021	NO	0.48	0	0	0	0
Ca	Cu	Ti	O	2	2	0	4	-2	1.34	0.73	1.035	0.605	1.4	0.858756	4.68639	NO	0.61	0	0	0	0
Ca	Ge	Ti	O	2	2	0	4	-2	1.34	0.73	1.035	0.605	1.4	0.858756	4.68639	NO	0.61	0	0	0	0
Co	Eu	Ti	O	2	2	0	4	-2	0.9	1.17	1.035	0.605	1.4	0.858756	4.68639	NO	0.27	0	0	0	0
Na	Ru	Ti	O	1	3	2	4	-2	1.39	0.68	1.035	0.605	1.4	0.858756	4.68639	NO	0.71	0	0	0	0
Na	Ir	Ti	O	1	3	2	4	-2	1.39	0.68	1.035	0.605	1.4	0.858756	4.68639	NO	0.71	0	0	0	0
Fe	Sn	Ti	O	2	2	0	4	-2	0.92	1.15	1.035	0.605	1.4	0.858756	4.68639	NO	0.23	0	0	0	0
Be	Ba	Ti	O	2	2	0	4	-2	0.45	1.61	1.03	0.605	1.4	0.856992	4.71332	NO	1.16	0	0	0	0
Mg	Eu	Ti	O	2	2	0	4	-2	0.89	1.17	1.03	0.605	1.4	0.856992	4.71332	NO	0.28	0	0	0	0
Fe	Yb	Ti	O	2	2	0	4	-2	0.92	1.14	1.03	0.605	1.4	0.856992	4.71332	NO	0.22	0	0	0	0
Na	Ti	Ti	O	1	3	2	4	-2	1.39	0.67	1.03	0.605	1.4	0.856992	4.71332	NO	0.72	0	0	0	0
Mo	Au	Ti	O	3	1	2	4	-2	0.69	1.37	1.03	0.605	1.4	0.856992	4.71332	NO	0.68	0	0	0	0
Fe	Ag	Ti	O	3	1	2	4	-2	0.78	1.28	1.03	0.605	1.4	0.856992	4.71332	NO	0.5	0	0	0	0
Na	Rh	Ti	O	1	3	2	4	-2	1.39	0.665	1.0275	0.605	1.4	0.856111	4.72708	NO	0.725	0	0	0	0
Ru	Au	Ti	O	3	1	2	4	-2	0.68	1.37	1.025	0.605	1.4	0.855229	4.74103	NO	0.69	0	0	0	0
Ir	Au	Ti	O	3	1	2	4	-2	0.68	1.37	1.025	0.605	1.4	0.855229	4.74103	NO	0.69	0	0	0	0
Ti	Dy	Ti	O	2	2	0	4	-2	0.86	1.19	1.025	0.605	1.4	0.855229	4.74103	NO	0.33	0	0	0	0
Mn	Tm	Ti	O	2	2	0	4	-2	0.96	1.09	1.025	0.605	1.4	0.855229	4.74103	NO	0.13	0	0	0	0
Zn	Cd	Ti	O	2	2	0	4	-2	0.74	1.31	1.025	0.605	1.4	0.855229	4.74103	NO	0.57	0	0	0	0
Pd	Dy	Ti	O	2	2	0	4	-2	0.86	1.19	1.025	0.605	1.4	0.855229	4.74103	NO	0.33	0	0	0	0
Sm	Ge	Ti	O	2	2	0	4	-2	1.32	0.73	1.025	0.605	1.4	0.855229	4.74103	NO	0.59	0	0	0	0
Ti	Pb	Ti	O	2	2	0	4	-2	0.86	1.19	1.025	0.605	1.4	0.855229	4.74103	NO	0.33	0	0	0	0
Co	Sn	Ti	O	2	2	0	4	-2	0.9	1.15	1.025	0.605	1.4	0.855229	4.74103	NO	0.25	0	0	0	0
Pd	Pb	Ti	O	2	2	0	4	-2	0.86	1.19	1.025	0.605	1.4	0.855229	4.74103	NO	0.33	0	0	0	0
Li	Ho	Ti	O	1	3	2	4	-2	0.92	1.12	1.02	0.605	1.4	0.853466	4.76956	NO	0.2	0	0	0	0
Co	Yb	Ti	O	2	2	0	4	-2	0.9	1.14	1.02	0.605	1.4	0.853466	4.76956	NO	0.24	0	0	0	0
Cu	Cd	Ti	O	2	2	0	4	-2	0.73	1.31	1.02	0.605	1.4	0.853466	4.76956	NO	0.58	0	0	0	0
Cu	Nd	Ti	O	1	3	2	4	-2	0.77	1.27	1.02	0.605	1.4	0.853466	4.76956	NO	0.5	0	0	0	0
Cd	Ge	Ti	O	2	2	0	4	-2	1.31	0.73	1.02	0.605	1.4	0.853466	4.76956	NO	0.58	0	0	0	0
Mg	Sn	Ti	O	2	2	0	4	-2	0.89	1.15	1.02	0.605	1.4	0.853466	4.76956	NO	0.26	0	0	0	0
Ti	Au	Ti	O	3	1	2	4	-2	0.67	1.37	1.02	0.605	1.4	0.853466	4.76956	NO	0.7	0	0	0	0
Ag	Sb	Ti	O	1	3	2	4	-2	1.28	0.76	1.02	0.605	1.4	0.853466	4.76956	NO	0.52	0	0	0	0
Na	Mn	Ti	O	1	3	2	4	-2	1.39	0.645	1.0175	0.605	1.4	0.852584	4.78413	NO	0.745	0	0	0	0
Al	Tl	Ti	O	3	1	2	4	-2	0.535	1.5	1.0175	0.605	1.4	0.852584	4.78413	NO	0.965	0	0	0	0
Rh	Au	Ti	O	3	1	2	4	-2	0.665	1.37	1.0175	0.605	1.4	0.852584	4.78413	NO	0.705	0	0	0	0
Ca	Ni	Ti	O	2	2	0	4	-2	1.34	0.69	1.015	0.605	1.4	0.851702	4.79892	NO	0.65	0	0	0	0
Ti	Eu	Ti	O	2	2	0	4	-2	0.86	1.17	1.015	0.605	1.4	0.851702	4.79892	NO	0.31	0	0	0	0
Pd	Eu	Ti	O	2	2	0	4	-2	0.86	1.17	1.015	0.605	1.4	0.851702	4.79892	NO	0.31	0	0	0	0
Na	V	Ti	O	1	3	2	4	-2	1.39	0.64	1.015	0.605	1.4	0.851702	4.79892	NO	0.75	0	0	0	0
Li	Gd	Ti	O	1	3	2	4	-2	0.92	1.107	1.0135	0.605	1.4	0.851173	4.8079	NO	0.187	0	0	0	0
Li	Tb	Ti	O	1	3	2	4	-2	0.92	1.095	1.0075	0.605	1.4	0.849057	4.84461	NO	0.175	0	0	0	0
Mn	Au	Ti	O	3	1	2	4	-2	0.645	1.37	1.0075	0.605	1.4	0.849057	4.84461	NO	0.725	0	0	0	0
Fe	Tm	Ti	O	2	2	0	4	-2	0.92	1.09	1.005	0.605	1.4	0.848175	4.8603	NO	0.17	0	0	0	0
V	Au	Ti	O	3	1	2	4	-2	0.64	1.37	1.005	0.605	1.4	0.848175	4.8603	NO	0.73	0	0	0	0
Cu	Sm	Ti	O	1	3	2	4	-2	0.77	1.24	1.005	0.605	1.4	0.848175	4.8603	NO	0.47	0	0	0	0
Na	Ga	Ti	O	1	3	2	4	-2	1.39	0.62	1.005	0.605	1.4	0.848175	4.8603	NO	0.77	0	0	0	0
Ti	Sn	Ti	O	2	2	0	4	-2	0.86	1.15	1.005	0.605	1.4	0.848175	4.8603	NO	0.29	0	0	0	0
Pd	Sn	Ti	O	2	2	0	4	-2	0.86	1.15	1.005	0.605	1.4	0.848175	4.8603	NO	0.29	0	0	0	0
Na	Cr	Ti	O	1	3	2	4	-2	1.39	0.615	1.0025	0.605	1.4	0.847294	4.87622	NO	0.775	0	0	0	0
Li	Dy	Ti	O	1	3	2	4	-2	0.92	1.083	1.0015	0.605	1.4	0.846941	4.88265	NO	0.163	0	0	0	0
Ti	Yb	Ti	O	2	2	0	4	-2	0.86	1.14	1	0.605	1.4	0.846412	4.89238	NO	0.28	0	0	0	0
Ni	Cd	Ti	O	2	2	0	4	-2	0.69	1.31	1	0.605	1.4	0.846412	4.89238	NO	0.62	0	0	0	0
Pd	Yb	Ti	O	2	2	0	4	-2	0.86	1.14	1	0.605	1.4	0.846412	4.89238	NO	0.28	0	0	0	0
Na	Co	Ti	O	1	3	2	4	-2	1.39	0.61	1	0.605	1.4	0.846412	4.89238	NO	0.78	0	0	0	0
Nb	Ag	Ti	O	3	1	2	4	-2	0.72	1.28	1	0.605	1.4	0.846412	4.89238	NO	0.56	0	0	0	0
Li	Y	Ti	O	1	3	2	4	-2	0.92	1.075	0.9975	0.605	1.4	0.84553	4.90878	NO	0.155	0	0	0	0
Co	Tm	Ti	O	2	2	0	4	-2	0.9	1.09	0.995	0.605	1.4	0.844649	4.92543	NO	0.19	0	0	0	0
Au	Ga	Ti	O	1	3	2	4	-2	1.37	0.62	0.995	0.605	1.4	0.844649	4.92543	NO	0.75	0	0	0	0
Cr	Dy	Ti	O	2	2	0	4	-2	0.8	1.19	0.995	0.605	1.4	0.844649	4.92543	NO	0.39	0	0	0	0
Rb	B	Ti	O	1	3	2	4	-2	1.72	0.27	0.995	0.605	1.4	0.844649	4.92543	NO	1.45	0	0	0	0
Pt	Dy	Ti	O	2	2	0	4	-2	0.8	1.19	0.995	0.605	1.4	0.844649	4.92543	NO	0.39	0	0	0	0
Cr	Pb	Ti	O	2	2	0	4	-2	0.8	1.19	0.995	0.605	1.4	0.844649	4.92543	NO	0.39	0	0	0	0
Pt	Pb	Ti	O	2	2	0	4	-2	0.8	1.19	0.995	0.605	1.4	0.844649	4.92543	NO	0.39	0	0	0	0
Cr	Au	Ti	O	3	1	2	4	-2	0.615	1.37	0.9925	0.605	1.4	0.843767	4.94234	NO	0.755	0	0	0	0
Li	Er	Ti	O	1	3	2	4	-2	0.92	1.062	0.991	0.605	1.4	0.843238	4.9526	NO	0.142	0	0	0	0
V	Dy	Ti	O	2	2	0	4	-2	0.79	1.19	0.99	0.605	1.4	0.842885	4.9595	NO	0.4	0	0	0	0
Mn	Hg	Ti	O	2	2	0	4	-2	0.96	1.02	0.99	0.605	1.4	0.842885	4.9595	NO	0.06	0	0	0	0
V	Pb	Ti	O	2	2	0	4	-2	0.79	1.19	0.99	0.605	1.4	0.842885	4.9595	NO	0.4	0	0	0	0
Co	Au	Ti	O	3	1	2	4	-2	0.61	1.37	0.99	0.605	1.4	0.842885	4.9595	NO	0.76	0	0	0	0
Li	Tm	Ti	O	1	3	2	4	-2	0.92	1.052	0.986	0.605	1.4	0.841475	4.98751	NO	0.132	0	0	0	0
Na	As	Ti	O	1	3	2	4	-2	1.39	0.58	0.985	0.605	1.4	0.841122	4.99462	NO	0.81	0	0	0	0
Cr	Eu	Ti	O	2	2	0	4	-2	0.8	1.17	0.985	0.605	1.4	0.841122	4.99462	NO	0.37	0	0	0	0
Pt	Eu	Ti	O	2	2	0	4	-2	0.8	1.17	0.985	0.605	1.4	0.841122	4.99462	NO	0.37	0	0	0	0
Mo	Ag	Ti	O	3	1	2	4	-2	0.69	1.28	0.985	0.605	1.4	0.841122	4.99462	NO	0.59	0	0	0	0
Li	Yb	Ti	O	1	3	2	4	-2	0.92	1.042	0.981	0.605	1.4	0.839711	5.02351	NO	0.122	0	0	0	0
V	Eu	Ti	O	2	2	0	4	-2	0.79	1.17	0.98	0.605	1.4	0.839359	5.03084	NO	0.38	0	0	0	0
Ru	Ag	Ti	O	3	1	2	4	-2	0.68	1.28	0.98	0.605	1.4	0.839359	5.03084	NO	0.6	0	0	0	0
Ag	Ir	Ti	O	1	3	2	4	-2	1.28	0.68	0.98	0.605	1.4	0.839359	5.03084	NO	0.6	0	0	0	0
Li	Lu	Ti	O	1	3	2	4	-2	0.92	1.032	0.976	0.605	1.4	0.837948	5.06063	NO	0.112	0	0	0	0
Ti	Tm	Ti	O	2	2	0	4	-2	0.86	1.09	0.975	0.605	1.4	0.837595	5.0682	NO	0.23	0	0	0	0
Pd	Tm	Ti	O	2	2	0	4	-2	0.86	1.09	0.975	0.605	1.4	0.837595	5.0682	NO	0.23	0	0	0	0
Au	As	Ti	O	1	3	2	4	-2	1.37	0.58	0.975	0.605	1.4	0.837595	5.0682	NO	0.79	0	0	0	0
Ti	Ag	Ti	O	3	1	2	4	-2	0.67	1.28	0.975	0.605	1.4	0.837595	5.0682	NO	0.61	0	0	0	0
Cr	Sn	Ti	O	2	2	0	4	-2	0.8	1.15	0.975	0.605	1.4	0.837595	5.0682	NO	0.35	0	0	0	0
Pt	Sn	Ti	O	2	2	0	4	-2	0.8	1.15	0.975	0.605	1.4	0.837595	5.0682	NO	0.35	0	0	0	0
Cu	Pr	Ti	O	1	3	2	4	-2	0.77	1.179	0.9745	0.605	1.4	0.837419	5.072	NO	0.409	0	0	0	0
Rh	Ag	Ti	O	3	1	2	4	-2	0.665	1.28	0.9725	0.605	1.4	0.836714	5.08732	NO	0.615	0	0	0	0
Cr	Yb	Ti	O	2	2	0	4	-2	0.8	1.14	0.97	0.605	1.4	0.835832	5.10675	NO	0.34	0	0	0	0
Fe	Hg	Ti	O	2	2	0	4	-2	0.92	1.02	0.97	0.605	1.4	0.835832	5.10675	NO	0.1	0	0	0	0
Pt	Yb	Ti	O	2	2	0	4	-2	0.8	1.14	0.97	0.605	1.4	0.835832	5.10675	NO	0.34	0	0	0	0
V	Sn	Ti	O	2	2	0	4	-2	0.79	1.15	0.97	0.605	1.4	0.835832	5.10675	NO	0.36	0	0	0	0
Cu	Bi	Ti	O	1	3	2	4	-2	0.77	1.17	0.97	0.605	1.4	0.835832	5.10675	NO	0.4	0	0	0	0
Li	Ce	Ti	O	1	3	2	4	-2	0.92	1.01	0.965	0.605	1.4	0.834069	5.14653	NO	0.09	0	0	0	0
V	Yb	Ti	O	2	2	0	4	-2	0.79	1.14	0.965	0.605	1.4	0.834069	5.14653	NO	0.35	0	0	0	0
Na	Cu	Ti	O	1	3	2	4	-2	1.39	0.54	0.965	0.605	1.4	0.834069	5.14653	NO	0.85	0	0	0	0
Zn	Pb	Ti	O	2	2	0	4	-2	0.74	1.19	0.965	0.605	1.4	0.834069	5.14653	NO	0.45	0	0	0	0
Mn	Ag	Ti	O	3	1	2	4	-2	0.645	1.28	0.9625	0.605	1.4	0.833187	5.1669	NO	0.635	0	0	0	0
Na	Al	Ti	O	1	3	2	4	-2	1.39	0.535	0.9625	0.605	1.4	0.833187	5.1669	NO	0.855	0	0	0	0
Co	Hg	Ti	O	2	2	0	4	-2	0.9	1.02	0.96	0.605	1.4	0.832305	5.18761	NO	0.12	0	0	0	0
Dy	Ge	Ti	O	2	2	0	4	-2	1.19	0.73	0.96	0.605	1.4	0.832305	5.18761	NO	0.46	0	0	0	0
Cu	Pb	Ti	O	2	2	0	4	-2	0.73	1.19	0.96	0.605	1.4	0.832305	5.18761	NO	0.46	0	0	0	0
Ge	Pb	Ti	O	2	2	0	4	-2	0.73	1.19	0.96	0.605	1.4	0.832305	5.18761	NO	0.46	0	0	0	0
V	Ag	Ti	O	3	1	2	4	-2	0.64	1.28	0.96	0.605	1.4	0.832305	5.18761	NO	0.64	0	0	0	0
K	B	Ti	O	1	3	2	4	-2	1.64	0.27	0.955	0.605	1.4	0.830542	5.23003	NO	1.37	0	0	0	0
Zn	Eu	Ti	O	2	2	0	4	-2	0.74	1.17	0.955	0.605	1.4	0.830542	5.23003	NO	0.43	0	0	0	0
Mg	Hg	Ti	O	2	2	0	4	-2	0.89	1.02	0.955	0.605	1.4	0.830542	5.23003	NO	0.13	0	0	0	0
Au	Al	Ti	O	1	3	2	4	-2	1.37	0.535	0.9525	0.605	1.4	0.82966	5.25176	NO	0.835	0	0	0	0
Cu	Eu	Ti	O	2	2	0	4	-2	0.73	1.17	0.95	0.605	1.4	0.828779	5.27385	NO	0.44	0	0	0	0
Eu	Ge	Ti	O	2	2	0	4	-2	1.17	0.73	0.95	0.605	1.4	0.828779	5.27385	NO	0.44	0	0	0	0
Ag	Ga	Ti	O	1	3	2	4	-2	1.28	0.62	0.95	0.605	1.4	0.828779	5.27385	NO	0.66	0	0	0	0
Cr	Ag	Ti	O	3	1	2	4	-2	0.615	1.28	0.9475	0.605	1.4	0.827897	5.29631	NO	0.665	0	0	0	0
Be	Sr	Ti	O	2	2	0	4	-2	0.45	1.44	0.945	0.605	1.4	0.827015	5.31914	NO	0.99	0	0	0	0
Zn	Sn	Ti	O	2	2	0	4	-2	0.74	1.15	0.945	0.605	1.4	0.827015	5.31914	NO	0.41	0	0	0	0
Cr	Tm	Ti	O	2	2	0	4	-2	0.8	1.09	0.945	0.605	1.4	0.827015	5.31914	NO	0.29	0	0	0	0
Cu	Ho	Ti	O	1	3	2	4	-2	0.77	1.12	0.945	0.605	1.4	0.827015	5.31914	NO	0.35	0	0	0	0
Pt	Tm	Ti	O	2	2	0	4	-2	0.8	1.09	0.945	0.605	1.4	0.827015	5.31914	NO	0.29	0	0	0	0
Co	Ag	Ti	O	3	1	2	4	-2	0.61	1.28	0.945	0.605	1.4	0.827015	5.31914	NO	0.67	0	0	0	0
V	Tm	Ti	O	2	2	0	4	-2	0.79	1.09	0.94	0.605	1.4	0.825252	5.36597	NO	0.3	0	0	0	0
Ti	Hg	Ti	O	2	2	0	4	-2	0.86	1.02	0.94	0.605	1.4	0.825252	5.36597	NO	0.16	0	0	0	0
Pd	Hg	Ti	O	2	2	0	4	-2	0.86	1.02	0.94	0.605	1.4	0.825252	5.36597	NO	0.16	0	0	0	0
Mn	Fe	Ti	O	2	2	0	4	-2	0.96	0.92	0.94	0.605	1.4	0.825252	5.36597	NO	0.04	0	0	0	0
Ni	Pb	Ti	O	2	2	0	4	-2	0.69	1.19	0.94	0.605	1.4	0.825252	5.36597	NO	0.5	0	0	0	0
Cu	Sn	Ti	O	2	2	0	4	-2	0.73	1.15	0.94	0.605	1.4	0.825252	5.36597	NO	0.42	0	0	0	0
Ge	Sn	Ti	O	2	2	0	4	-2	0.73	1.15	0.94	0.605	1.4	0.825252	5.36597	NO	0.42	0	0	0	0
Cu	Gd	Ti	O	1	3	2	4	-2	0.77	1.107	0.9385	0.605	1.4	0.824723	5.38033	NO	0.337	0	0	0	0
Yb	Ge	Ti	O	2	2	0	4	-2	1.14	0.73	0.935	0.605	1.4	0.823488	5.4144	NO	0.41	0	0	0	0
Li	Eu	Ti	O	1	3	2	4	-2	0.92	0.947	0.9335	0.605	1.4	0.822959	5.42925	NO	0.027	0	0	0	0
Cu	Tb	Ti	O	1	3	2	4	-2	0.77	1.095	0.9325	0.605	1.4	0.822607	5.43923	NO	0.325	0	0	0	0
Ni	Eu	Ti	O	2	2	0	4	-2	0.69	1.17	0.93	0.605	1.4	0.821725	5.4645	NO	0.48	0	0	0	0
Mn	Co	Ti	O	2	2	0	4	-2	0.96	0.9	0.93	0.605	1.4	0.821725	5.4645	NO	0.06	0	0	0	0
Ag	As	Ti	O	1	3	2	4	-2	1.28	0.58	0.93	0.605	1.4	0.821725	5.4645	NO	0.7	0	0	0	0
Cu	Dy	Ti	O	1	3	2	4	-2	0.77	1.083	0.9265	0.605	1.4	0.820491	5.50061	NO	0.313	0	0	0	0
Mg	Mn	Ti	O	2	2	0	4	-2	0.89	0.96	0.925	0.605	1.4	0.819962	5.51636	NO	0.07	0	0	0	0
Cu	Y	Ti	O	1	3	2	4	-2	0.77	1.075	0.9225	0.605	1.4	0.81908	5.54298	NO	0.305	0	0	0	0
Ni	Sn	Ti	O	2	2	0	4	-2	0.69	1.15	0.92	0.605	1.4	0.818198	5.57006	NO	0.46	0	0	0	0
Cu	Er	Ti	O	1	3	2	4	-2	0.77	1.062	0.916	0.605	1.4	0.816788	5.61441	NO	0.292	0	0	0	0
Cu	Tm	Ti	O	1	3	2	4	-2	0.77	1.052	0.911	0.605	1.4	0.815024	5.67165	NO	0.282	0	0	0	0
Cr	Hg	Ti	O	2	2	0	4	-2	0.8	1.02	0.91	0.605	1.4	0.814672	5.68334	NO	0.22	0	0	0	0
Tm	Ge	Ti	O	2	2	0	4	-2	1.09	0.73	0.91	0.605	1.4	0.814672	5.68334	NO	0.36	0	0	0	0
Pt	Hg	Ti	O	2	2	0	4	-2	0.8	1.02	0.91	0.605	1.4	0.814672	5.68334	NO	0.22	0	0	0	0
Fe	Co	Ti	O	2	2	0	4	-2	0.92	0.9	0.91	0.605	1.4	0.814672	5.68334	NO	0.02	0	0	0	0
Cu	Ag	Ti	O	3	1	2	4	-2	0.54	1.28	0.91	0.605	1.4	0.814672	5.68334	NO	0.74	0	0	0	0
Ti	Mn	Ti	O	2	2	0	4	-2	0.86	0.96	0.91	0.605	1.4	0.814672	5.68334	NO	0.1	0	0	0	0
Mn	Pd	Ti	O	2	2	0	4	-2	0.96	0.86	0.91	0.605	1.4	0.814672	5.68334	NO	0.1	0	0	0	0
Ag	Al	Ti	O	1	3	2	4	-2	1.28	0.535	0.9075	0.605	1.4	0.81379	5.71296	NO	0.745	0	0	0	0
Cu	Yb	Ti	O	1	3	2	4	-2	0.77	1.042	0.906	0.605	1.4	0.813261	5.73099	NO	0.272	0	0	0	0
V	Hg	Ti	O	2	2	0	4	-2	0.79	1.02	0.905	0.605	1.4	0.812908	5.74312	NO	0.23	0	0	0	0
Mg	Fe	Ti	O	2	2	0	4	-2	0.89	0.92	0.905	0.605	1.4	0.812908	5.74312	NO	0.03	0	0	0	0
Li	Tl	Ti	O	1	3	2	4	-2	0.92	0.885	0.9025	0.605	1.4	0.812027	5.77384	NO	0.035	0	0	0	0
Cu	Lu	Ti	O	1	3	2	4	-2	0.77	1.032	0.901	0.605	1.4	0.811498	5.79255	NO	0.262	0	0	0	0
Li	Sc	Ti	O	1	3	2	4	-2	0.92	0.87	0.895	0.605	1.4	0.809382	5.8695	NO	0.05	0	0	0	0
Be	Ca	Ti	O	2	2	0	4	-2	0.45	1.34	0.895	0.605	1.4	0.809382	5.8695	NO	0.89	0	0	0	0
Mg	Co	Ti	O	2	2	0	4	-2	0.89	0.9	0.895	0.605	1.4	0.809382	5.8695	NO	0.01	0	0	0	0
Cu	Ce	Ti	O	1	3	2	4	-2	0.77	1.01	0.89	0.605	1.4	0.807618	5.93633	NO	0.24	0	0	0	0
Ti	Fe	Ti	O	2	2	0	4	-2	0.86	0.92	0.89	0.605	1.4	0.807618	5.93633	NO	0.06	0	0	0	0
Fe	Pd	Ti	O	2	2	0	4	-2	0.92	0.86	0.89	0.605	1.4	0.807618	5.93633	NO	0.06	0	0	0	0
Li	Cu	Nb	O	1	1	0	5	-2	0.92	0.77	0.845	0.64	1.4	0.778164	5.93907	NO	0.15	0	0	0	0
B	Tl	Ti	O	3	1	2	4	-2	0.27	1.5	0.885	0.605	1.4	0.805855	6.00578	NO	1.23	0	0	0	0
Li	Au	Ti	O	1	3	2	4	-2	0.92	0.85	0.885	0.605	1.4	0.805855	6.00578	NO	0.07	0	0	0	0
Be	Cd	Ti	O	2	2	0	4	-2	0.45	1.31	0.88	0.605	1.4	0.804092	6.07797	NO	0.86	0	0	0	0
Zn	Hg	Ti	O	2	2	0	4	-2	0.74	1.02	0.88	0.605	1.4	0.804092	6.07797	NO	0.28	0	0	0	0
Ti	Co	Ti	O	2	2	0	4	-2	0.86	0.9	0.88	0.605	1.4	0.804092	6.07797	NO	0.04	0	0	0	0
Cr	Mn	Ti	O	2	2	0	4	-2	0.8	0.96	0.88	0.605	1.4	0.804092	6.07797	NO	0.16	0	0	0	0
Mn	Pt	Ti	O	2	2	0	4	-2	0.96	0.8	0.88	0.605	1.4	0.804092	6.07797	NO	0.16	0	0	0	0
Co	Pd	Ti	O	2	2	0	4	-2	0.9	0.86	0.88	0.605	1.4	0.804092	6.07797	NO	0.04	0	0	0	0
Cu	Hg	Ti	O	2	2	0	4	-2	0.73	1.02	0.875	0.605	1.4	0.802328	6.15307	NO	0.29	0	0	0	0
Hg	Ge	Ti	O	2	2	0	4	-2	1.02	0.73	0.875	0.605	1.4	0.802328	6.15307	NO	0.29	0	0	0	0
Mg	Ti	Ti	O	2	2	0	4	-2	0.89	0.86	0.875	0.605	1.4	0.802328	6.15307	NO	0.03	0	0	0	0
Mg	Pd	Ti	O	2	2	0	4	-2	0.89	0.86	0.875	0.605	1.4	0.802328	6.15307	NO	0.03	0	0	0	0
V	Mn	Ti	O	2	2	0	4	-2	0.79	0.96	0.875	0.605	1.4	0.802328	6.15307	NO	0.17	0	0	0	0
Li	In	Ti	O	1	3	2	4	-2	0.92	0.8	0.86	0.605	1.4	0.797038	6.39748	NO	0.12	0	0	0	0
Cr	Fe	Ti	O	2	2	0	4	-2	0.8	0.92	0.86	0.605	1.4	0.797038	6.39748	NO	0.12	0	0	0	0
Fe	Pt	Ti	O	2	2	0	4	-2	0.92	0.8	0.86	0.605	1.4	0.797038	6.39748	NO	0.12	0	0	0	0
Ti	Pd	Ti	O	2	2	0	4	-2	0.86	0.86	0.86	0.605	1.4	0.797038	6.39748	NO	0	0	0	0	0
Cu	Eu	Ti	O	1	3	2	4	-2	0.77	0.947	0.8585	0.605	1.4	0.796509	6.42364	NO	0.177	0	0	0	0
Ni	Hg	Ti	O	2	2	0	4	-2	0.69	1.02	0.855	0.605	1.4	0.795275	6.48597	NO	0.33	0	0	0	0
V	Fe	Ti	O	2	2	0	4	-2	0.79	0.92	0.855	0.605	1.4	0.795275	6.48597	NO	0.13	0	0	0	0
Li	Fe	Ti	O	1	3	2	4	-2	0.92	0.78	0.85	0.605	1.4	0.793511	6.57832	NO	0.14	0	0	0	0
Cr	Co	Ti	O	2	2	0	4	-2	0.8	0.9	0.85	0.605	1.4	0.793511	6.57832	NO	0.1	0	0	0	0
Co	Pt	Ti	O	2	2	0	4	-2	0.9	0.8	0.85	0.605	1.4	0.793511	6.57832	NO	0.1	0	0	0	0
Mn	Zn	Ti	O	2	2	0	4	-2	0.96	0.74	0.85	0.605	1.4	0.793511	6.57832	NO	0.22	0	0	0	0
Mg	Cr	Ti	O	2	2	0	4	-2	0.89	0.8	0.845	0.605	1.4	0.791748	6.67478	NO	0.09	0	0	0	0
Mg	Pt	Ti	O	2	2	0	4	-2	0.89	0.8	0.845	0.605	1.4	0.791748	6.67478	NO	0.09	0	0	0	0
V	Co	Ti	O	2	2	0	4	-2	0.79	0.9	0.845	0.605	1.4	0.791748	6.67478	NO	0.11	0	0	0	0
Mn	Cu	Ti	O	2	2	0	4	-2	0.96	0.73	0.845	0.605	1.4	0.791748	6.67478	NO	0.23	0	0	0	0
Mn	Ge	Ti	O	2	2	0	4	-2	0.96	0.73	0.845	0.605	1.4	0.791748	6.67478	NO	0.23	0	0	0	0
Li	Sb	Ti	O	1	3	2	4	-2	0.92	0.76	0.84	0.605	1.4	0.789985	6.77561	NO	0.16	0	0	0	0
Mg	V	Ti	O	2	2	0	4	-2	0.89	0.79	0.84	0.605	1.4	0.789985	6.77561	NO	0.1	0	0	0	0
Ti	Cr	Ti	O	2	2	0	4	-2	0.86	0.8	0.83	0.605	1.4	0.786458	6.99155	NO	0.06	0	0	0	0
Ti	Pt	Ti	O	2	2	0	4	-2	0.86	0.8	0.83	0.605	1.4	0.786458	6.99155	NO	0.06	0	0	0	0
Cr	Pd	Ti	O	2	2	0	4	-2	0.8	0.86	0.83	0.605	1.4	0.786458	6.99155	NO	0.06	0	0	0	0
Fe	Zn	Ti	O	2	2	0	4	-2	0.92	0.74	0.83	0.605	1.4	0.786458	6.99155	NO	0.18	0	0	0	0
Pd	Pt	Ti	O	2	2	0	4	-2	0.86	0.8	0.83	0.605	1.4	0.786458	6.99155	NO	0.06	0	0	0	0
Na	B	Ti	O	1	3	2	4	-2	1.39	0.27	0.83	0.605	1.4	0.786458	6.99155	NO	1.12	0	0	0	0
Cu	Tl	Ti	O	1	3	2	4	-2	0.77	0.885	0.8275	0.605	1.4	0.785576	7.04874	NO	0.115	0	0	0	0
Ti	V	Ti	O	2	2	0	4	-2	0.86	0.79	0.825	0.605	1.4	0.784695	7.10731	NO	0.07	0	0	0	0
V	Pd	Ti	O	2	2	0	4	-2	0.79	0.86	0.825	0.605	1.4	0.784695	7.10731	NO	0.07	0	0	0	0
Mn	Ni	Ti	O	2	2	0	4	-2	0.96	0.69	0.825	0.605	1.4	0.784695	7.10731	NO	0.27	0	0	0	0
Fe	Cu	Ti	O	2	2	0	4	-2	0.92	0.73	0.825	0.605	1.4	0.784695	7.10731	NO	0.19	0	0	0	0
Fe	Ge	Ti	O	2	2	0	4	-2	0.92	0.73	0.825	0.605	1.4	0.784695	7.10731	NO	0.19	0	0	0	0
Li	Nb	Ti	O	1	3	2	4	-2	0.92	0.72	0.82	0.605	1.4	0.782931	7.22874	NO	0.2	0	0	0	0
Li	Ta	Ti	O	1	3	2	4	-2	0.92	0.72	0.82	0.605	1.4	0.782931	7.22874	NO	0.2	0	0	0	0
Sc	Cu	Ti	O	3	1	2	4	-2	0.87	0.77	0.82	0.605	1.4	0.782931	7.22874	NO	0.1	0	0	0	0
Co	Zn	Ti	O	2	2	0	4	-2	0.9	0.74	0.82	0.605	1.4	0.782931	7.22874	NO	0.16	0	0	0	0
Au	B	Ti	O	1	3	2	4	-2	1.37	0.27	0.82	0.605	1.4	0.782931	7.22874	NO	1.1	0	0	0	0
Be	Pb	Ti	O	2	2	0	4	-2	0.45	1.19	0.82	0.605	1.4	0.782931	7.22874	NO	0.74	0	0	0	0
Mg	Zn	Ti	O	2	2	0	4	-2	0.89	0.74	0.815	0.605	1.4	0.781168	7.35626	NO	0.15	0	0	0	0
Co	Cu	Ti	O	2	2	0	4	-2	0.9	0.73	0.815	0.605	1.4	0.781168	7.35626	NO	0.17	0	0	0	0
Co	Ge	Ti	O	2	2	0	4	-2	0.9	0.73	0.815	0.605	1.4	0.781168	7.35626	NO	0.17	0	0	0	0
Mg	Cu	Ti	O	2	2	0	4	-2	0.89	0.73	0.81	0.605	1.4	0.779404	7.49031	NO	0.16	0	0	0	0
Mg	Ge	Ti	O	2	2	0	4	-2	0.89	0.73	0.81	0.605	1.4	0.779404	7.49031	NO	0.16	0	0	0	0
Cu	Au	Ti	O	1	3	2	4	-2	0.77	0.85	0.81	0.605	1.4	0.779404	7.49031	NO	0.08	0	0	0	0
Be	Eu	Ti	O	2	2	0	4	-2	0.45	1.17	0.81	0.605	1.4	0.779404	7.49031	NO	0.72	0	0	0	0
Li	Mo	Ti	O	1	3	2	4	-2	0.92	0.69	0.805	0.605	1.4	0.777641	7.63138	NO	0.23	0	0	0	0
Fe	Ni	Ti	O	2	2	0	4	-2	0.92	0.69	0.805	0.605	1.4	0.777641	7.63138	NO	0.23	0	0	0	0
Be	Sn	Ti	O	2	2	0	4	-2	0.45	1.15	0.8	0.605	1.4	0.775878	7.78	NO	0.7	0	0	0	0
Li	Ru	Ti	O	1	3	2	4	-2	0.92	0.68	0.8	0.605	1.4	0.775878	7.78	NO	0.24	0	0	0	0
Li	Ir	Ti	O	1	3	2	4	-2	0.92	0.68	0.8	0.605	1.4	0.775878	7.78	NO	0.24	0	0	0	0
Ti	Zn	Ti	O	2	2	0	4	-2	0.86	0.74	0.8	0.605	1.4	0.775878	7.78	NO	0.12	0	0	0	0
Cr	Pt	Ti	O	2	2	0	4	-2	0.8	0.8	0.8	0.605	1.4	0.775878	7.78	NO	0	0	0	0	0
Zn	Pd	Ti	O	2	2	0	4	-2	0.74	0.86	0.8	0.605	1.4	0.775878	7.78	NO	0.12	0	0	0	0
Li	Ti	Ti	O	1	3	2	4	-2	0.92	0.67	0.795	0.605	1.4	0.774114	7.93678	NO	0.25	0	0	0	0
V	Cr	Ti	O	2	2	0	4	-2	0.79	0.8	0.795	0.605	1.4	0.774114	7.93678	NO	0.01	0	0	0	0
V	Pt	Ti	O	2	2	0	4	-2	0.79	0.8	0.795	0.605	1.4	0.774114	7.93678	NO	0.01	0	0	0	0
Ti	Cu	Ti	O	2	2	0	4	-2	0.86	0.73	0.795	0.605	1.4	0.774114	7.93678	NO	0.13	0	0	0	0
Ti	Ge	Ti	O	2	2	0	4	-2	0.86	0.73	0.795	0.605	1.4	0.774114	7.93678	NO	0.13	0	0	0	0
Co	Ni	Ti	O	2	2	0	4	-2	0.9	0.69	0.795	0.605	1.4	0.774114	7.93678	NO	0.21	0	0	0	0
Cu	Pd	Ti	O	2	2	0	4	-2	0.73	0.86	0.795	0.605	1.4	0.774114	7.93678	NO	0.13	0	0	0	0
Pd	Ge	Ti	O	2	2	0	4	-2	0.86	0.73	0.795	0.605	1.4	0.774114	7.93678	NO	0.13	0	0	0	0
Li	Rh	Ti	O	1	3	2	4	-2	0.92	0.665	0.7925	0.605	1.4	0.773233	8.01843	NO	0.255	0	0	0	0
Mg	Ni	Ti	O	2	2	0	4	-2	0.89	0.69	0.79	0.605	1.4	0.772351	8.10238	NO	0.2	0	0	0	0
Cu	In	Ti	O	1	3	2	4	-2	0.77	0.8	0.785	0.605	1.4	0.770588	8.27753	NO	0.03	0	0	0	0
Li	Mn	Ti	O	1	3	2	4	-2	0.92	0.645	0.7825	0.605	1.4	0.769706	8.36894	NO	0.275	0	0	0	0
Li	V	Ti	O	1	3	2	4	-2	0.92	0.64	0.78	0.605	1.4	0.768824	8.46306	NO	0.28	0	0	0	0
Fe	Cu	Ti	O	3	1	2	4	-2	0.78	0.77	0.775	0.605	1.4	0.767061	8.65987	NO	0.01	0	0	0	0
Ag	B	Ti	O	1	3	2	4	-2	1.28	0.27	0.775	0.605	1.4	0.767061	8.65987	NO	1.01	0	0	0	0
Ti	Ni	Ti	O	2	2	0	4	-2	0.86	0.69	0.775	0.605	1.4	0.767061	8.65987	NO	0.17	0	0	0	0
Ni	Pd	Ti	O	2	2	0	4	-2	0.69	0.86	0.775	0.605	1.4	0.767061	8.65987	NO	0.17	0	0	0	0
Li	Ga	Ti	O	1	3	2	4	-2	0.92	0.62	0.77	0.605	1.4	0.765298	8.869	NO	0.3	0	0	0	0
Cr	Zn	Ti	O	2	2	0	4	-2	0.8	0.74	0.77	0.605	1.4	0.765298	8.869	NO	0.06	0	0	0	0
Zn	Pt	Ti	O	2	2	0	4	-2	0.74	0.8	0.77	0.605	1.4	0.765298	8.869	NO	0.06	0	0	0	0
Li	Cr	Ti	O	1	3	2	4	-2	0.92	0.615	0.7675	0.605	1.4	0.764416	8.97854	NO	0.305	0	0	0	0
Li	Co	Ti	O	1	3	2	4	-2	0.92	0.61	0.765	0.605	1.4	0.763534	9.09161	NO	0.31	0	0	0	0
V	Zn	Ti	O	2	2	0	4	-2	0.79	0.74	0.765	0.605	1.4	0.763534	9.09161	NO	0.05	0	0	0	0
Cr	Cu	Ti	O	2	2	0	4	-2	0.8	0.73	0.765	0.605	1.4	0.763534	9.09161	NO	0.07	0	0	0	0
Cr	Ge	Ti	O	2	2	0	4	-2	0.8	0.73	0.765	0.605	1.4	0.763534	9.09161	NO	0.07	0	0	0	0
Cu	Sb	Ti	O	1	3	2	4	-2	0.77	0.76	0.765	0.605	1.4	0.763534	9.09161	NO	0.01	0	0	0	0
Cu	Pt	Ti	O	2	2	0	4	-2	0.73	0.8	0.765	0.605	1.4	0.763534	9.09161	NO	0.07	0	0	0	0
Pt	Ge	Ti	O	2	2	0	4	-2	0.8	0.73	0.765	0.605	1.4	0.763534	9.09161	NO	0.07	0	0	0	0
V	Cu	Ti	O	2	2	0	4	-2	0.79	0.73	0.76	0.605	1.4	0.761771	9.32899	NO	0.06	0	0	0	0
V	Ge	Ti	O	2	2	0	4	-2	0.79	0.73	0.76	0.605	1.4	0.761771	9.32899	NO	0.06	0	0	0	0
Li	As	Ti	O	1	3	2	4	-2	0.92	0.58	0.75	0.605	1.4	0.758244	9.85419	NO	0.34	0	0	0	0
Cr	Ni	Ti	O	2	2	0	4	-2	0.8	0.69	0.745	0.605	1.4	0.756481	10.1456	NO	0.11	0	0	0	0
Ni	Pt	Ti	O	2	2	0	4	-2	0.69	0.8	0.745	0.605	1.4	0.756481	10.1456	NO	0.11	0	0	0	0
Cu	Nb	Ti	O	1	3	2	4	-2	0.77	0.72	0.745	0.605	1.4	0.756481	10.1456	NO	0.05	0	0	0	0
Cu	Ta	Ti	O	1	3	2	4	-2	0.77	0.72	0.745	0.605	1.4	0.756481	10.1456	NO	0.05	0	0	0	0
V	Ni	Ti	O	2	2	0	4	-2	0.79	0.69	0.74	0.605	1.4	0.754717	10.4591	NO	0.1	0	0	0	0
Be	Hg	Ti	O	2	2	0	4	-2	0.45	1.02	0.735	0.605	1.4	0.752954	10.7972	NO	0.57	0	0	0	0
Cu	Zn	Ti	O	2	2	0	4	-2	0.73	0.74	0.735	0.605	1.4	0.752954	10.7972	NO	0.01	0	0	0	0
Zn	Ge	Ti	O	2	2	0	4	-2	0.74	0.73	0.735	0.605	1.4	0.752954	10.7972	NO	0.01	0	0	0	0
Li	Cu	Ti	O	1	3	2	4	-2	0.92	0.54	0.73	0.605	1.4	0.751191	11.1629	NO	0.38	0	0	0	0
Cu	Ge	Ti	O	2	2	0	4	-2	0.73	0.73	0.73	0.605	1.4	0.751191	11.1629	NO	0	0	0	0	0
Cu	Mo	Ti	O	1	3	2	4	-2	0.77	0.69	0.73	0.605	1.4	0.751191	11.1629	NO	0.08	0	0	0	0
Li	Al	Ti	O	1	3	2	4	-2	0.92	0.535	0.7275	0.605	1.4	0.750309	11.3571	NO	0.385	0	0	0	0
Cu	Ru	Ti	O	1	3	2	4	-2	0.77	0.68	0.725	0.605	1.4	0.749427	11.5596	NO	0.09	0	0	0	0
Cu	Ir	Ti	O	1	3	2	4	-2	0.77	0.68	0.725	0.605	1.4	0.749427	11.5596	NO	0.09	0	0	0	0
Ti	Cu	Ti	O	3	1	2	4	-2	0.67	0.77	0.72	0.605	1.4	0.747664	11.9914	NO	0.1	0	0	0	0
Cu	Rh	Ti	O	1	3	2	4	-2	0.77	0.665	0.7175	0.605	1.4	0.746782	12.2219	NO	0.105	0	0	0	0
Ni	Zn	Ti	O	2	2	0	4	-2	0.69	0.74	0.715	0.605	1.4	0.745901	12.463	NO	0.05	0	0	0	0
Ni	Cu	Ti	O	2	2	0	4	-2	0.69	0.73	0.71	0.605	1.4	0.744137	12.9801	NO	0.04	0	0	0	0
Ni	Ge	Ti	O	2	2	0	4	-2	0.69	0.73	0.71	0.605	1.4	0.744137	12.9801	NO	0.04	0	0	0	0
Mn	Cu	Ti	O	3	1	2	4	-2	0.645	0.77	0.7075	0.605	1.4	0.743256	13.2579	NO	0.125	0	0	0	0
V	Cu	Ti	O	3	1	2	4	-2	0.64	0.77	0.705	0.605	1.4	0.742374	13.5496	NO	0.13	0	0	0	0
Be	Mn	Ti	O	2	2	0	4	-2	0.45	0.96	0.705	0.605	1.4	0.742374	13.5496	NO	0.51	0	0	0	0
Cu	Ga	Ti	O	1	3	2	4	-2	0.77	0.62	0.695	0.605	1.4	0.738847	14.8807	NO	0.15	0	0	0	0
Cr	Cu	Ti	O	3	1	2	4	-2	0.615	0.77	0.6925	0.605	1.4	0.737966	15.2615	NO	0.155	0	0	0	0
Co	Cu	Ti	O	3	1	2	4	-2	0.61	0.77	0.69	0.605	1.4	0.737084	15.6649	NO	0.16	0	0	0	0
Be	Fe	Ti	O	2	2	0	4	-2	0.45	0.92	0.685	0.605	1.4	0.735321	16.5479	NO	0.47	0	0	0	0
Be	Co	Ti	O	2	2	0	4	-2	0.45	0.9	0.675	0.605	1.4	0.731794	18.6951	NO	0.45	0	0	0	0
Cu	As	Ti	O	1	3	2	4	-2	0.77	0.58	0.675	0.605	1.4	0.731794	18.6951	NO	0.19	0	0	0	0
Be	Mg	Ti	O	2	2	0	4	-2	0.45	0.89	0.67	0.605	1.4	0.73003	20.018	NO	0.44	0	0	0	0
Be	Ti	Ti	O	2	2	0	4	-2	0.45	0.86	0.655	0.605	1.4	0.72474	25.5824	NO	0.41	0	0	0	0
Be	Pd	Ti	O	2	2	0	4	-2	0.45	0.86	0.655	0.605	1.4	0.72474	25.5824	NO	0.41	0	0	0	0
Cu	Al	Ti	O	1	3	2	4	-2	0.77	0.535	0.6525	0.605	1.4	0.723859	26.8527	NO	0.235	0	0	0	0
Be	Cr	Ti	O	2	2	0	4	-2	0.45	0.8	0.625	0.605	1.4	0.71416	61.8415	NO	0.35	0	0	0	0
Be	Pt	Ti	O	2	2	0	4	-2	0.45	0.8	0.625	0.605	1.4	0.71416	61.8415	NO	0.35	0	0	0	0
Be	V	Ti	O	2	2	0	4	-2	0.45	0.79	0.62	0.605	1.4	0.712397	82.0013	NO	0.34	0	0	0	0

## Sheet: BVS-for-12-coord
A	A'	B	X	nA	nA'	Ox difference	nB	nX	rA	rA'	rA adj	rB	rX	t	tau	tau pred	r difference
Cs	La	Ti	O	1	3	2	4	-2	1.88	1.36	1.62	0.605	1.4	1.06507	3.75123	YES	0.52
Cs	Pr	Ti	O	1	3	2	4	-2	1.88	1.25093	1.56546	0.605	1.4	1.04584	3.75745	YES	0.629071
Cs	Sm	Ti	O	1	3	2	4	-2	1.88	1.24	1.56	0.605	1.4	1.04391	3.75847	YES	0.64
Cs	Nd	Ti	O	1	3	2	4	-2	1.88	1.22993	1.55496	0.605	1.4	1.04213	3.75948	YES	0.650071
Cs	Bi	Ti	O	1	3	2	4	-2	1.88	1.20693	1.54346	0.605	1.4	1.03808	3.76205	YES	0.673071
Rb	La	Ti	O	1	3	2	4	-2	1.72	1.36	1.54	0.605	1.4	1.03685	3.7629	YES	0.36
Cs	Eu	Ti	O	1	3	2	4	-2	1.88	1.18693	1.53346	0.605	1.4	1.03455	3.76458	YES	0.693071
Cs	Tb	Ti	O	1	3	2	4	-2	1.88	1.16193	1.52096	0.605	1.4	1.03014	3.76815	YES	0.718071
Cs	Gd	Ti	O	1	3	2	4	-2	1.88	1.14393	1.51196	0.605	1.4	1.02697	3.77101	YES	0.736071
Cs	Y	Ti	O	1	3	2	4	-2	1.88	1.12693	1.50346	0.605	1.4	1.02397	3.77394	YES	0.753071
Cs	Er	Ti	O	1	3	2	4	-2	1.88	1.12293	1.50146	0.605	1.4	1.02326	3.77466	YES	0.757071
K	La	Ti	O	1	3	2	4	-2	1.64	1.36	1.5	0.605	1.4	1.02275	3.7752	YES	0.28
Cs	Dy	Ti	O	1	3	2	4	-2	1.88	1.11793	1.49896	0.605	1.4	1.02238	3.77558	YES	0.762071
Cs	Tl	Ti	O	1	3	2	4	-2	1.88	1.11593	1.49796	0.605	1.4	1.02203	3.77595	YES	0.764071
Cs	Tm	Ti	O	1	3	2	4	-2	1.88	1.11293	1.49646	0.605	1.4	1.0215	3.77652	YES	0.767071
Sr	Ba	Ti	O	2	2	0	4	-2	1.44	1.54795	1.49398	0.605	1.4	1.02062	3.77748	YES	0.107951
Cs	Ho	Ti	O	1	3	2	4	-2	1.88	1.10493	1.49246	0.605	1.4	1.02009	3.77807	YES	0.775071
Rb	Pr	Ti	O	1	3	2	4	-2	1.72	1.25093	1.48546	0.605	1.4	1.01762	3.7809	YES	0.469071
Rb	Sm	Ti	O	1	3	2	4	-2	1.72	1.24	1.48	0.605	1.4	1.01569	3.78323	YES	0.48
Rb	Nd	Ti	O	1	3	2	4	-2	1.72	1.22993	1.47496	0.605	1.4	1.01392	3.78547	YES	0.490071
Cs	Sb	Ti	O	1	3	2	4	-2	1.88	1.06793	1.47396	0.605	1.4	1.01357	3.78593	YES	0.812071
Cs	Yb	Ti	O	1	3	2	4	-2	1.88	1.06693	1.47346	0.605	1.4	1.01339	3.78615	YES	0.813071
Cs	Lu	Ti	O	1	3	2	4	-2	1.88	1.05993	1.46996	0.605	1.4	1.01216	3.78778	YES	0.820071
Rb	Bi	Ti	O	1	3	2	4	-2	1.72	1.20693	1.46346	0.605	1.4	1.00986	3.79092	YES	0.513071
Ba	Eu	Ti	O	2	2	0	4	-2	1.54795	1.36495	1.45645	0.605	1.4	1.00739	3.79447	YES	0.183
Rb	Eu	Ti	O	1	3	2	4	-2	1.72	1.18893	1.45446	0.605	1.4	1.00669	3.79551	YES	0.531071
Cs	Nb	Ti	O	1	3	2	4	-2	1.88	1.02293	1.45146	0.605	1.4	1.00563	3.79711	YES	0.857071
Cs	In	Ti	O	1	3	2	4	-2	1.88	1.01493	1.44746	0.605	1.4	1.00422	3.7993	YES	0.865071
K	Pr	Ti	O	1	3	2	4	-2	1.64	1.25093	1.44546	0.605	1.4	1.00351	3.80042	YES	0.389071
Cs	Ce	Ti	O	1	3	2	4	-2	1.88	1.01	1.445	0.605	1.4	1.00335	3.80068	YES	0.87
Rb	Tb	Ti	O	1	3	2	4	-2	1.72	1.16193	1.44096	0.605	1.4	1.00193	3.80299	YES	0.558071
K	Sm	Ti	O	1	3	2	4	-2	1.64	1.24	1.44	0.605	1.4	1.00159	3.80355	YES	0.4
Cs	Cu	Ti	O	1	3	2	4	-2	1.88	0.997951	1.43898	0.605	1.4	1.00123	3.80415	YES	0.882049
K	Nd	Ti	O	1	3	2	4	-2	1.64	1.22993	1.43496	0.605	1.4	0.999812	3.80654	YES	0.410071
Rb	Gd	Ti	O	1	3	2	4	-2	1.72	1.14393	1.43196	0.605	1.4	0.998754	3.80837	YES	0.576071
Rb	Y	Ti	O	1	3	2	4	-2	1.72	1.12693	1.42346	0.605	1.4	0.995756	3.81376	YES	0.593071
K	Bi	Ti	O	1	3	2	4	-2	1.64	1.20693	1.42346	0.605	1.4	0.995756	3.81376	YES	0.433071
Rb	Er	Ti	O	1	3	2	4	-2	1.72	1.12293	1.42146	0.605	1.4	0.995051	3.81508	YES	0.597071
Cs	Sc	Ti	O	1	3	2	4	-2	1.88	0.961929	1.42096	0.605	1.4	0.994874	3.81541	YES	0.918071
Rb	Dy	Ti	O	1	3	2	4	-2	1.72	1.11793	1.41896	0.605	1.4	0.994169	3.81674	YES	0.602071
Rb	Tl	Ti	O	1	3	2	4	-2	1.72	1.11593	1.41796	0.605	1.4	0.993816	3.81741	YES	0.604071
Rb	Tm	Ti	O	1	3	2	4	-2	1.72	1.11293	1.41646	0.605	1.4	0.993287	3.81843	YES	0.607071
K	Eu	Ti	O	1	3	2	4	-2	1.64	1.18893	1.41446	0.605	1.4	0.992582	3.8198	YES	0.451071
Cs	Au	Ti	O	1	3	2	4	-2	1.88	0.945929	1.41296	0.605	1.4	0.992053	3.82085	YES	0.934071
Rb	Ho	Ti	O	1	3	2	4	-2	1.72	1.10493	1.41246	0.605	1.4	0.991877	3.8212	YES	0.615071
Sr	Eu	Ti	O	2	2	0	4	-2	1.44	1.36495	1.40248	0.605	1.4	0.988354	3.82841	YES	0.075049
K	Tb	Ti	O	1	3	2	4	-2	1.64	1.16193	1.40096	0.605	1.4	0.987821	3.82954	YES	0.478071
Ba	Sn	Ti	O	2	2	0	4	-2	1.54795	1.24695	1.39745	0.605	1.4	0.986582	3.83221	YES	0.301
Rb	Sb	Ti	O	1	3	2	4	-2	1.72	1.06793	1.39396	0.605	1.4	0.985352	3.83491	YES	0.652071
Rb	Yb	Ti	O	1	3	2	4	-2	1.72	1.06693	1.39346	0.605	1.4	0.985176	3.83531	YES	0.653071
Cs	Ti	Ti	O	1	3	2	4	-2	1.88	0.906929	1.39346	0.605	1.4	0.985176	3.83531	YES	0.973071
Cs	Rh	Ti	O	1	3	2	4	-2	1.88	0.905929	1.39296	0.605	1.4	0.985	3.8357	YES	0.974071
K	Gd	Ti	O	1	3	2	4	-2	1.64	1.14393	1.39196	0.605	1.4	0.984647	3.83649	YES	0.496071
Rb	Lu	Ti	O	1	3	2	4	-2	1.72	1.05993	1.38996	0.605	1.4	0.983942	3.83809	YES	0.660071
K	Y	Ti	O	1	3	2	4	-2	1.64	1.12693	1.38346	0.605	1.4	0.981649	3.84342	YES	0.513071
K	Er	Ti	O	1	3	2	4	-2	1.64	1.12293	1.38146	0.605	1.4	0.980944	3.8451	YES	0.517071
K	Dy	Ti	O	1	3	2	4	-2	1.64	1.11793	1.37896	0.605	1.4	0.980062	3.84723	YES	0.522071
Cs	Fe	Ti	O	1	3	2	4	-2	1.88	0.877929	1.37896	0.605	1.4	0.980062	3.84723	YES	1.00207
K	Tl	Ti	O	1	3	2	4	-2	1.64	1.11593	1.37796	0.605	1.4	0.979709	3.84809	YES	0.524071
Sm	Eu	Ti	O	2	2	0	4	-2	1.38895	1.36495	1.37695	0.605	1.4	0.979352	3.84896	YES	0.024
K	Tm	Ti	O	1	3	2	4	-2	1.64	1.11293	1.37646	0.605	1.4	0.97918	3.84939	YES	0.527071
Cs	Mn	Ti	O	1	3	2	4	-2	1.88	0.872929	1.37646	0.605	1.4	0.97918	3.84939	YES	1.00707
Na	La	Ti	O	1	3	2	4	-2	1.39	1.36	1.375	0.605	1.4	0.978664	3.85067	YES	0.03
K	Ho	Ti	O	1	3	2	4	-2	1.64	1.10493	1.37246	0.605	1.4	0.97777	3.85291	YES	0.535071
Ca	Ba	Ti	O	2	2	0	4	-2	1.19595	1.54795	1.37195	0.605	1.4	0.977589	3.85337	YES	0.352
Rb	Nb	Ti	O	1	3	2	4	-2	1.72	1.02293	1.37146	0.605	1.4	0.977417	3.8538	YES	0.697071
Ba	Hg	Ti	O	2	2	0	4	-2	1.54795	1.19295	1.37045	0.605	1.4	0.97706	3.85471	YES	0.355
Ba	Pb	Ti	O	2	2	0	4	-2	1.54795	1.19	1.36898	0.605	1.4	0.976539	3.85605	YES	0.357951
Cs	V	Ti	O	1	3	2	4	-2	1.88	0.855929	1.36796	0.605	1.4	0.976183	3.85697	YES	1.02407
Rb	In	Ti	O	1	3	2	4	-2	1.72	1.01493	1.36746	0.605	1.4	0.976006	3.85743	YES	0.705071
Rb	Ce	Ti	O	1	3	2	4	-2	1.72	1.01	1.365	0.605	1.4	0.975137	3.85971	YES	0.71
Au	La	Ti	O	1	3	2	4	-2	1.37	1.36	1.365	0.605	1.4	0.975137	3.85971	YES	0.01
Cs	Ga	Ti	O	1	3	2	4	-2	1.88	0.842929	1.36146	0.605	1.4	0.97389	3.86303	YES	1.03707
Rb	Cu	Ti	O	1	3	2	4	-2	1.72	0.997951	1.35898	0.605	1.4	0.973013	3.86541	YES	0.722049
K	Sb	Ti	O	1	3	2	4	-2	1.64	1.06793	1.35396	0.605	1.4	0.971245	3.8703	YES	0.572071
K	Yb	Ti	O	1	3	2	4	-2	1.64	1.06693	1.35346	0.605	1.4	0.971069	3.8708	YES	0.573071
Cs	Cr	Ti	O	1	3	2	4	-2	1.88	0.820929	1.35046	0.605	1.4	0.970011	3.8738	YES	1.05907
K	Lu	Ti	O	1	3	2	4	-2	1.64	1.05993	1.34996	0.605	1.4	0.969835	3.87431	YES	0.580071
Cs	Co	Ti	O	1	3	2	4	-2	1.88	0.812929	1.34646	0.605	1.4	0.9686	3.87789	YES	1.06707
Sr	Sn	Ti	O	2	2	0	4	-2	1.44	1.24695	1.34348	0.605	1.4	0.967546	3.881	YES	0.193049
Eu	Tl	Ti	O	3	1	2	4	-2	1.18693	1.5	1.34346	0.605	1.4	0.967542	3.88101	YES	0.313071
Ba	Cd	Ti	O	2	2	0	4	-2	1.54795	1.13795	1.34295	0.605	1.4	0.967361	3.88155	YES	0.41
Ag	La	Ti	O	1	3	2	4	-2	1.32442	1.36	1.34221	0.605	1.4	0.967099	3.88234	YES	0.0355845
Rb	Sc	Ti	O	1	3	2	4	-2	1.72	0.961929	1.34096	0.605	1.4	0.966661	3.88366	YES	0.758071
Rb	Au	Ti	O	1	3	2	4	-2	1.72	0.945929	1.33296	0.605	1.4	0.963839	3.89237	YES	0.774071
K	Nb	Ti	O	1	3	2	4	-2	1.64	1.02293	1.33146	0.605	1.4	0.96331	3.89405	YES	0.617071
K	In	Ti	O	1	3	2	4	-2	1.64	1.01493	1.32746	0.605	1.4	0.9619	3.89858	YES	0.625071
K	Ce	Ti	O	1	3	2	4	-2	1.64	1.01	1.325	0.605	1.4	0.96103	3.90143	YES	0.63
Cs	Al	Ti	O	1	3	2	4	-2	1.88	0.763929	1.32196	0.605	1.4	0.95996	3.90498	YES	1.11607
K	Cs	Nb	O	1	1	0	5	-2	1.64	1.88	1.76	0.64	1.4	1.09532	3.90596	YES	0.24
Na	Pr	Ti	O	1	3	2	4	-2	1.39	1.25093	1.32046	0.605	1.4	0.959431	3.90676	YES	0.139071
Rb	Cs	Nb	O	1	1	0	5	-2	1.72	1.88	1.8	0.64	1.4	1.10919	3.90733	YES	0.16
K	Rb	Nb	O	1	1	0	5	-2	1.64	1.72	1.68	0.64	1.4	1.06759	3.90748	YES	0.08
K	Cu	Ti	O	1	3	2	4	-2	1.64	0.997951	1.31898	0.605	1.4	0.958906	3.90854	YES	0.642049
Ca	Sr	Ti	O	2	2	0	4	-2	1.19595	1.44	1.31798	0.605	1.4	0.958553	3.90975	YES	0.244049
Sm	Sn	Ti	O	2	2	0	4	-2	1.38895	1.24695	1.31795	0.605	1.4	0.958544	3.90978	YES	0.142
Na	Cs	Nb	O	1	1	0	5	-2	1.39	1.88	1.635	0.64	1.4	1.05199	3.91125	YES	0.49
Sr	Hg	Ti	O	2	2	0	4	-2	1.44	1.19295	1.31648	0.605	1.4	0.958024	3.91157	YES	0.247049
Cs	Au	Nb	O	1	1	0	5	-2	1.88	1.37	1.625	0.64	1.4	1.04853	3.91242	YES	0.51
Na	Sm	Ti	O	1	3	2	4	-2	1.39	1.24	1.315	0.605	1.4	0.957504	3.91337	YES	0.15
Sr	Pb	Ti	O	2	2	0	4	-2	1.44	1.19	1.315	0.605	1.4	0.957504	3.91337	YES	0.25
Y	Tl	Ti	O	3	1	2	4	-2	1.12693	1.5	1.31346	0.605	1.4	0.956962	3.91526	YES	0.373071
Rb	Ti	Ti	O	1	3	2	4	-2	1.72	0.906929	1.31346	0.605	1.4	0.956962	3.91526	YES	0.813071
Cs	Ag	Nb	O	1	1	0	5	-2	1.88	1.32442	1.60221	0.64	1.4	1.04063	3.91555	YES	0.555585
Rb	Rh	Ti	O	1	3	2	4	-2	1.72	0.905929	1.31296	0.605	1.4	0.956786	3.91588	YES	0.814071
Au	Pr	Ti	O	1	3	2	4	-2	1.37	1.25093	1.31046	0.605	1.4	0.955904	3.919	YES	0.119071
Na	Nd	Ti	O	1	3	2	4	-2	1.39	1.22993	1.30996	0.605	1.4	0.955728	3.91963	YES	0.160071
Eu	Yb	Ti	O	2	2	0	4	-2	1.36495	1.25195	1.30845	0.605	1.4	0.955194	3.92154	YES	0.113
Na	Rb	Nb	O	1	1	0	5	-2	1.39	1.72	1.555	0.64	1.4	1.02426	3.92437	YES	0.33
Eu	Sn	Ti	O	2	2	0	4	-2	1.36495	1.24695	1.30595	0.605	1.4	0.954312	3.92474	YES	0.118
Au	Sm	Ti	O	1	3	2	4	-2	1.37	1.24	1.305	0.605	1.4	0.953977	3.92597	YES	0.13
Rb	Au	Nb	O	1	1	0	5	-2	1.72	1.37	1.545	0.64	1.4	1.0208	3.92667	YES	0.35
Ba	Pd	Ti	O	2	2	0	4	-2	1.54795	1.05495	1.30145	0.605	1.4	0.952725	3.9306	YES	0.493
K	Sc	Ti	O	1	3	2	4	-2	1.64	0.961929	1.30096	0.605	1.4	0.952554	3.93125	YES	0.678071
Rb	Ag	Nb	O	1	1	0	5	-2	1.72	1.32442	1.52221	0.64	1.4	1.0129	3.93255	YES	0.395585
Au	Nd	Ti	O	1	3	2	4	-2	1.37	1.22993	1.29996	0.605	1.4	0.952201	3.93257	YES	0.140071
Rb	Fe	Ti	O	1	3	2	4	-2	1.72	0.877929	1.29896	0.605	1.4	0.951848	3.9339	YES	0.842071
Na	Bi	Ti	O	1	3	2	4	-2	1.39	1.20693	1.29846	0.605	1.4	0.951672	3.93457	YES	0.183071
Na	K	Nb	O	1	1	0	5	-2	1.39	1.64	1.515	0.64	1.4	1.0104	3.93461	YES	0.25
Rb	Mn	Ti	O	1	3	2	4	-2	1.72	0.872929	1.29646	0.605	1.4	0.950967	3.93726	YES	0.847071
K	Au	Nb	O	1	1	0	5	-2	1.64	1.37	1.505	0.64	1.4	1.00693	3.93761	YES	0.27
K	Au	Ti	O	1	3	2	4	-2	1.64	0.945929	1.29296	0.605	1.4	0.949732	3.94205	YES	0.694071
Hg	Sm	Ti	O	2	2	0	4	-2	1.19295	1.38895	1.29095	0.605	1.4	0.949022	3.94484	YES	0.196
K	Ag	Nb	O	1	1	0	5	-2	1.64	1.32442	1.48221	0.64	1.4	0.999034	3.94517	YES	0.315585
Sm	Pb	Ti	O	2	2	0	4	-2	1.38895	1.19	1.28948	0.605	1.4	0.948502	3.9469	YES	0.198951
Na	Eu	Ti	O	1	3	2	4	-2	1.39	1.18893	1.28946	0.605	1.4	0.948498	3.94692	YES	0.201071
Ba	Pt	Ti	O	2	2	0	4	-2	1.54795	1.03095	1.28945	0.605	1.4	0.948493	3.94693	YES	0.517
Sr	Cd	Ti	O	2	2	0	4	-2	1.44	1.13795	1.28898	0.605	1.4	0.948326	3.9476	YES	0.302049
Au	Bi	Ti	O	1	3	2	4	-2	1.37	1.20693	1.28846	0.605	1.4	0.948145	3.94832	YES	0.163071
Rb	V	Ti	O	1	3	2	4	-2	1.72	0.855929	1.28796	0.605	1.4	0.947969	3.94903	YES	0.864071
Ba	Mn	Ti	O	2	2	0	4	-2	1.54795	1.02795	1.28795	0.605	1.4	0.947964	3.94905	YES	0.52
Ag	Pr	Ti	O	1	3	2	4	-2	1.32442	1.25093	1.28767	0.605	1.4	0.947866	3.94944	YES	0.0734865
Cs	Mo	Ti	O	1	3	2	4	-2	1.88	0.69	1.285	0.605	1.4	0.946924	3.95326	YES	1.19
Sb	Tl	Ti	O	3	1	2	4	-2	1.06793	1.5	1.28396	0.605	1.4	0.946558	3.95475	YES	0.432071
Cs	Cu	Nb	O	1	1	0	5	-2	1.88	1.02342	1.45171	0.64	1.4	0.988462	3.957	YES	0.856585
Ag	Sm	Ti	O	1	3	2	4	-2	1.32442	1.24	1.28221	0.605	1.4	0.945939	3.9573	YES	0.0844155
Rb	Ga	Ti	O	1	3	2	4	-2	1.72	0.842929	1.28146	0.605	1.4	0.945677	3.95839	YES	0.877071
Ca	Eu	Ti	O	2	2	0	4	-2	1.19595	1.36495	1.28045	0.605	1.4	0.945319	3.95987	YES	0.169
Cs	Ru	Ti	O	1	3	2	4	-2	1.88	0.68	1.28	0.605	1.4	0.94516	3.96054	YES	1.2
Cs	Ir	Ti	O	1	3	2	4	-2	1.88	0.68	1.28	0.605	1.4	0.94516	3.96054	YES	1.2
Au	Eu	Ti	O	1	3	2	4	-2	1.37	1.18893	1.27946	0.605	1.4	0.944971	3.96133	YES	0.181071
Hg	Eu	Ti	O	2	2	0	4	-2	1.19295	1.36495	1.27895	0.605	1.4	0.94479	3.96209	YES	0.172
Eu	Pb	Ti	O	2	2	0	4	-2	1.36495	1.19	1.27748	0.605	1.4	0.94427	3.96429	YES	0.174951
Ag	Nd	Ti	O	1	3	2	4	-2	1.32442	1.22993	1.27717	0.605	1.4	0.944163	3.96474	YES	0.0944865
Li	Cs	Nb	O	1	1	0	5	-2	0.985415	1.88	1.43271	0.64	1.4	0.981876	3.96543	YES	0.894585
Na	Tb	Ti	O	1	3	2	4	-2	1.39	1.16193	1.27596	0.605	1.4	0.943737	3.96656	YES	0.228071
K	Ti	Ti	O	1	3	2	4	-2	1.64	0.906929	1.27346	0.605	1.4	0.942855	3.97035	YES	0.733071
K	Rh	Ti	O	1	3	2	4	-2	1.64	0.905929	1.27296	0.605	1.4	0.942679	3.97111	YES	0.734071
Rb	Cr	Ti	O	1	3	2	4	-2	1.72	0.820929	1.27046	0.605	1.4	0.941797	3.97496	YES	0.899071
Ba	Cr	Ti	O	2	2	0	4	-2	1.54795	0.992951	1.27045	0.605	1.4	0.941793	3.97498	YES	0.555
Na	Gd	Ti	O	1	3	2	4	-2	1.39	1.14393	1.26696	0.605	1.4	0.940563	3.98043	YES	0.246071
Rb	Co	Ti	O	1	3	2	4	-2	1.72	0.812929	1.26646	0.605	1.4	0.940387	3.98122	YES	0.907071
Au	Tb	Ti	O	1	3	2	4	-2	1.37	1.16193	1.26596	0.605	1.4	0.94021	3.98202	YES	0.208071
Ag	Bi	Ti	O	1	3	2	4	-2	1.32442	1.20693	1.26567	0.605	1.4	0.940107	3.98248	YES	0.117487
Eu	Dy	Ti	O	2	2	0	4	-2	1.36495	1.16295	1.26395	0.605	1.4	0.9395	3.98523	YES	0.202
Nb	Tl	Ti	O	3	1	2	4	-2	1.02293	1.5	1.26146	0.605	1.4	0.938623	3.98924	YES	0.477071
K	Fe	Ti	O	1	3	2	4	-2	1.64	0.877929	1.25896	0.605	1.4	0.937742	3.99333	YES	0.762071
Na	Au	Nb	O	1	1	0	5	-2	1.39	1.37	1.38	0.64	1.4	0.963606	3.99376	YES	0.02
Na	Y	Ti	O	1	3	2	4	-2	1.39	1.12693	1.25846	0.605	1.4	0.937565	3.99415	YES	0.263071
Ba	Zn	Ti	O	2	2	0	4	-2	1.54795	0.966951	1.25745	0.605	1.4	0.937208	3.99582	YES	0.581
Au	Gd	Ti	O	1	3	2	4	-2	1.37	1.14393	1.25696	0.605	1.4	0.937036	3.99663	YES	0.226071
Ag	Eu	Ti	O	1	3	2	4	-2	1.32442	1.18893	1.25667	0.605	1.4	0.936933	3.99712	YES	0.135487
Na	Er	Ti	O	1	3	2	4	-2	1.39	1.12293	1.25646	0.605	1.4	0.93686	3.99746	YES	0.267071
K	Mn	Ti	O	1	3	2	4	-2	1.64	0.872929	1.25646	0.605	1.4	0.93686	3.99746	YES	0.767071
Rb	Cu	Nb	O	1	1	0	5	-2	1.72	1.02342	1.37171	0.64	1.4	0.960732	3.99895	YES	0.696585
Ba	Fe	Ti	O	2	2	0	4	-2	1.54795	0.962951	1.25545	0.605	1.4	0.936502	3.99916	YES	0.585
Ba	V	Ti	O	2	2	0	4	-2	1.54795	0.962951	1.25545	0.605	1.4	0.936502	3.99916	YES	0.585
Ce	Tl	Ti	O	3	1	2	4	-2	1.01	1.5	1.255	0.605	1.4	0.936343	3.99991	YES	0.49
Na	Dy	Ti	O	1	3	2	4	-2	1.39	1.11793	1.25396	0.605	1.4	0.935978	4.00166	YES	0.272071
Na	Tl	Ti	O	1	3	2	4	-2	1.39	1.11593	1.25296	0.605	1.4	0.935626	4.00335	YES	0.274071
Mg	Ba	Ti	O	2	2	0	4	-2	0.955951	1.54795	1.25195	0.605	1.4	0.935268	4.00507	YES	0.592
Na	Tm	Ti	O	1	3	2	4	-2	1.39	1.11293	1.25146	0.605	1.4	0.935097	4.0059	YES	0.277071
Cd	Eu	Ti	O	2	2	0	4	-2	1.13795	1.36495	1.25145	0.605	1.4	0.935092	4.00592	YES	0.227
Na	Ag	Nb	O	1	1	0	5	-2	1.39	1.32442	1.35721	0.64	1.4	0.955706	4.00856	YES	0.0655845
Yb	Sn	Ti	O	2	2	0	4	-2	1.25195	1.24695	1.24945	0.605	1.4	0.934386	4.00936	YES	0.005
Y	Au	Ti	O	3	1	2	4	-2	1.12693	1.37	1.24846	0.605	1.4	0.934038	4.01107	YES	0.243071
Li	Rb	Nb	O	1	1	0	5	-2	0.985415	1.72	1.35271	0.64	1.4	0.954146	4.01168	YES	0.734585
K	V	Ti	O	1	3	2	4	-2	1.64	0.855929	1.24796	0.605	1.4	0.933862	4.01194	YES	0.784071
Ba	Co	Ti	O	2	2	0	4	-2	1.54795	0.947951	1.24795	0.605	1.4	0.933857	4.01196	YES	0.6
Sr	Pd	Ti	O	2	2	0	4	-2	1.44	1.05495	1.24748	0.605	1.4	0.93369	4.01279	YES	0.385049
Na	Ho	Ti	O	1	3	2	4	-2	1.39	1.10493	1.24746	0.605	1.4	0.933686	4.01281	YES	0.285071
Au	Er	Ti	O	1	3	2	4	-2	1.37	1.12293	1.24646	0.605	1.4	0.933333	4.01456	YES	0.247071
Ag	Au	Nb	O	1	1	0	5	-2	1.32442	1.37	1.34721	0.64	1.4	0.95224	4.0156	YES	0.0455845
Au	Dy	Ti	O	1	3	2	4	-2	1.37	1.11793	1.24396	0.605	1.4	0.932451	4.01897	YES	0.252071
Ag	Tb	Ti	O	1	3	2	4	-2	1.32442	1.16193	1.24317	0.605	1.4	0.932172	4.02038	YES	0.162487
Au	Tl	Ti	O	1	3	2	4	-2	1.37	1.11593	1.24296	0.605	1.4	0.932099	4.02075	YES	0.254071
Rb	Al	Ti	O	1	3	2	4	-2	1.72	0.763929	1.24196	0.605	1.4	0.931746	4.02254	YES	0.956071
Au	Tm	Ti	O	1	3	2	4	-2	1.37	1.11293	1.24146	0.605	1.4	0.93157	4.02344	YES	0.257071
K	Ga	Ti	O	1	3	2	4	-2	1.64	0.842929	1.24146	0.605	1.4	0.93157	4.02344	YES	0.797071
K	Cu	Nb	O	1	1	0	5	-2	1.64	1.02342	1.33171	0.64	1.4	0.946867	4.02721	YES	0.616585
Au	Ho	Ti	O	1	3	2	4	-2	1.37	1.10493	1.23746	0.605	1.4	0.930159	4.03071	YES	0.265071
Sr	Pt	Ti	O	2	2	0	4	-2	1.44	1.03095	1.23548	0.605	1.4	0.929458	4.03438	YES	0.409049
Ag	Gd	Ti	O	1	3	2	4	-2	1.32442	1.14393	1.23417	0.605	1.4	0.928998	4.0368	YES	0.180487
Sr	Mn	Ti	O	2	2	0	4	-2	1.44	1.02795	1.23398	0.605	1.4	0.928929	4.03717	YES	0.412049
Ba	Cu	Ti	O	2	2	0	4	-2	1.54795	0.917951	1.23295	0.605	1.4	0.928567	4.03909	YES	0.63
Ba	Ni	Ti	O	2	2	0	4	-2	1.54795	0.916951	1.23245	0.605	1.4	0.928391	4.04003	YES	0.631
Li	K	Nb	O	1	1	0	5	-2	0.985415	1.64	1.31271	0.64	1.4	0.940281	4.04269	YES	0.654585
Sc	Tl	Ti	O	3	1	2	4	-2	0.961929	1.5	1.23096	0.605	1.4	0.927867	4.04284	YES	0.538071
K	Cr	Ti	O	1	3	2	4	-2	1.64	0.820929	1.23046	0.605	1.4	0.92769	4.04379	YES	0.819071
Cs	As	Ti	O	1	3	2	4	-2	1.88	0.58	1.23	0.605	1.4	0.927527	4.04468	YES	1.3
Na	Sb	Ti	O	1	3	2	4	-2	1.39	1.06793	1.22896	0.605	1.4	0.927161	4.04666	YES	0.322071
Na	Yb	Ti	O	1	3	2	4	-2	1.39	1.06693	1.22846	0.605	1.4	0.926985	4.04762	YES	0.323071
Eu	Tm	Ti	O	2	2	0	4	-2	1.36495	1.09	1.22748	0.605	1.4	0.926636	4.04952	YES	0.274951
K	Co	Ti	O	1	3	2	4	-2	1.64	0.812929	1.22646	0.605	1.4	0.92628	4.05148	YES	0.827071
Y	Ag	Ti	O	3	1	2	4	-2	1.12693	1.32442	1.22567	0.605	1.4	0.926	4.05302	YES	0.197487
Na	Lu	Ti	O	1	3	2	4	-2	1.39	1.05993	1.22496	0.605	1.4	0.925751	4.05441	YES	0.330071
Ag	Er	Ti	O	1	3	2	4	-2	1.32442	1.12293	1.22367	0.605	1.4	0.925295	4.05694	YES	0.201487
Au	Tl	Ti	O	3	1	2	4	-2	0.945929	1.5	1.22296	0.605	1.4	0.925045	4.05834	YES	0.554071
Hg	Yb	Ti	O	2	2	0	4	-2	1.19295	1.25195	1.22245	0.605	1.4	0.924864	4.05936	YES	0.059
Pd	Sm	Ti	O	2	2	0	4	-2	1.05495	1.38895	1.22195	0.605	1.4	0.924688	4.06035	YES	0.334
Ca	Sn	Ti	O	2	2	0	4	-2	1.19595	1.24695	1.22145	0.605	1.4	0.924512	4.06134	YES	0.051
Ag	Dy	Ti	O	1	3	2	4	-2	1.32442	1.11793	1.22117	0.605	1.4	0.924413	4.0619	YES	0.206487
Yb	Pb	Ti	O	2	2	0	4	-2	1.25195	1.19	1.22098	0.605	1.4	0.924344	4.06229	YES	0.061951
Ag	Tl	Ti	O	1	3	2	4	-2	1.32442	1.11593	1.22017	0.605	1.4	0.924061	4.0639	YES	0.208487
Rb	Ta	Ti	O	1	3	2	4	-2	1.72	0.72	1.22	0.605	1.4	0.924	4.06424	YES	1
Hg	Sn	Ti	O	2	2	0	4	-2	1.19295	1.24695	1.21995	0.605	1.4	0.923983	4.06434	YES	0.054
Au	Sb	Ti	O	1	3	2	4	-2	1.37	1.06793	1.21896	0.605	1.4	0.923635	4.06633	YES	0.302071
Ag	Tm	Ti	O	1	3	2	4	-2	1.32442	1.11293	1.21867	0.605	1.4	0.923532	4.06692	YES	0.211487
Sn	Pb	Ti	O	2	2	0	4	-2	1.24695	1.19	1.21848	0.605	1.4	0.923462	4.06731	YES	0.056951
Au	Yb	Ti	O	1	3	2	4	-2	1.37	1.06693	1.21846	0.605	1.4	0.923458	4.06734	YES	0.303071
Sr	Cr	Ti	O	2	2	0	4	-2	1.44	0.992951	1.21648	0.605	1.4	0.922757	4.07138	YES	0.447049
Au	Lu	Ti	O	1	3	2	4	-2	1.37	1.05993	1.21496	0.605	1.4	0.922224	4.07448	YES	0.310071
Ag	Ho	Ti	O	1	3	2	4	-2	1.32442	1.10493	1.21467	0.605	1.4	0.922121	4.07508	YES	0.219487
Nd	Eu	Ti	O	2	2	0	4	-2	1.06293	1.36495	1.21394	0.605	1.4	0.921863	4.07659	YES	0.302022
Pd	Eu	Ti	O	2	2	0	4	-2	1.05495	1.36495	1.20995	0.605	1.4	0.920456	4.08493	YES	0.31
Pt	Sm	Ti	O	2	2	0	4	-2	1.03095	1.38895	1.20995	0.605	1.4	0.920456	4.08493	YES	0.358
Mn	Sm	Ti	O	2	2	0	4	-2	1.02795	1.38895	1.20845	0.605	1.4	0.919927	4.08811	YES	0.361
Na	Nb	Ti	O	1	3	2	4	-2	1.39	1.02293	1.20646	0.605	1.4	0.919226	4.09236	YES	0.367071
Rb	Mo	Ti	O	1	3	2	4	-2	1.72	0.69	1.205	0.605	1.4	0.91871	4.09552	YES	1.03
Dy	Sn	Ti	O	2	2	0	4	-2	1.16295	1.24695	1.20495	0.605	1.4	0.918693	4.09563	YES	0.084
Ba	Ti	Ti	O	2	2	0	4	-2	1.54795	0.86	1.20398	0.605	1.4	0.918348	4.09775	YES	0.687951
Sr	Zn	Ti	O	2	2	0	4	-2	1.44	0.966951	1.20348	0.605	1.4	0.918172	4.09884	YES	0.473049
Na	In	Ti	O	1	3	2	4	-2	1.39	1.01493	1.20246	0.605	1.4	0.917816	4.10105	YES	0.375071
K	Al	Ti	O	1	3	2	4	-2	1.64	0.763929	1.20196	0.605	1.4	0.917639	4.10215	YES	0.876071
Ti	Tl	Ti	O	3	1	2	4	-2	0.903929	1.5	1.20196	0.605	1.4	0.917639	4.10215	YES	0.596071
Sr	Fe	Ti	O	2	2	0	4	-2	1.44	0.962951	1.20148	0.605	1.4	0.917467	4.10322	YES	0.477049
Sr	V	Ti	O	2	2	0	4	-2	1.44	0.962951	1.20148	0.605	1.4	0.917467	4.10322	YES	0.477049
Na	Ce	Ti	O	1	3	2	4	-2	1.39	1.01	1.2	0.605	1.4	0.916946	4.10649	YES	0.38
Rb	Ru	Ti	O	1	3	2	4	-2	1.72	0.68	1.2	0.605	1.4	0.916946	4.10649	YES	1.04
Rb	Ir	Ti	O	1	3	2	4	-2	1.72	0.68	1.2	0.605	1.4	0.916946	4.10649	YES	1.04
Mg	Sr	Ti	O	2	2	0	4	-2	0.955951	1.44	1.19798	0.605	1.4	0.916232	4.11101	YES	0.484049
Pt	Eu	Ti	O	2	2	0	4	-2	1.03095	1.36495	1.19795	0.605	1.4	0.916224	4.11106	YES	0.334
Nb	Au	Ti	O	3	1	2	4	-2	1.02293	1.37	1.19646	0.605	1.4	0.9157	4.11441	YES	0.347071
Mn	Eu	Ti	O	2	2	0	4	-2	1.02795	1.36495	1.19645	0.605	1.4	0.915695	4.11444	YES	0.337
Ag	Sb	Ti	O	1	3	2	4	-2	1.32442	1.06793	1.19617	0.605	1.4	0.915596	4.11507	YES	0.256487
Ag	Yb	Ti	O	1	3	2	4	-2	1.32442	1.06693	1.19567	0.605	1.4	0.91542	4.11621	YES	0.257487
Ca	Hg	Ti	O	2	2	0	4	-2	1.19595	1.19295	1.19445	0.605	1.4	0.914989	4.11899	YES	0.003
Sr	Co	Ti	O	2	2	0	4	-2	1.44	0.947951	1.19398	0.605	1.4	0.914822	4.12008	YES	0.492049
Na	Cu	Ti	O	1	3	2	4	-2	1.39	0.997951	1.19398	0.605	1.4	0.914822	4.12008	YES	0.392049
Ca	Pb	Ti	O	2	2	0	4	-2	1.19595	1.19	1.19298	0.605	1.4	0.914469	4.12237	YES	0.005951
Au	In	Ti	O	1	3	2	4	-2	1.37	1.01493	1.19246	0.605	1.4	0.914289	4.12355	YES	0.355071
Cd	Sn	Ti	O	2	2	0	4	-2	1.13795	1.24695	1.19245	0.605	1.4	0.914284	4.12358	YES	0.109
Ag	Lu	Ti	O	1	3	2	4	-2	1.32442	1.05993	1.19217	0.605	1.4	0.914186	4.12423	YES	0.264487
Cu	La	Ti	O	1	3	2	4	-2	1.02342	1.36	1.19171	0.605	1.4	0.914022	4.1253	YES	0.336585
Hg	Pb	Ti	O	2	2	0	4	-2	1.19295	1.19	1.19148	0.605	1.4	0.91394	4.12584	YES	0.002951
Cr	Sm	Ti	O	2	2	0	4	-2	0.992951	1.38895	1.19095	0.605	1.4	0.913755	4.12706	YES	0.396
Au	Ce	Ti	O	1	3	2	4	-2	1.37	1.01	1.19	0.605	1.4	0.91342	4.12927	YES	0.36
Fe	Tl	Ti	O	3	1	2	4	-2	0.877929	1.5	1.18896	0.605	1.4	0.913055	4.1317	YES	0.622071
Mn	Tl	Ti	O	3	1	2	4	-2	0.872929	1.5	1.18646	0.605	1.4	0.912173	4.13761	YES	0.627071
K	Ta	Ti	O	1	3	2	4	-2	1.64	0.72	1.18	0.605	1.4	0.909893	4.15325	YES	0.92
Sr	Cu	Ti	O	2	2	0	4	-2	1.44	0.917951	1.17898	0.605	1.4	0.909532	4.15578	YES	0.522049
Cr	Eu	Ti	O	2	2	0	4	-2	0.992951	1.36495	1.17895	0.605	1.4	0.909523	4.15584	YES	0.372
Sr	Ni	Ti	O	2	2	0	4	-2	1.44	0.916951	1.17848	0.605	1.4	0.909355	4.15701	YES	0.523049
Cs	B	Ti	O	1	3	2	4	-2	1.88	0.476929	1.17846	0.605	1.4	0.909351	4.15704	YES	1.40307
V	Tl	Ti	O	3	1	2	4	-2	0.855929	1.5	1.17796	0.605	1.4	0.909175	4.15828	YES	0.644071
Hg	Dy	Ti	O	2	2	0	4	-2	1.19295	1.16295	1.17795	0.605	1.4	0.90917	4.15831	YES	0.03
Na	Cu	Nb	O	1	1	0	5	-2	1.39	1.02342	1.20671	0.64	1.4	0.90354	4.16059	YES	0.366585
Dy	Pb	Ti	O	2	2	0	4	-2	1.16295	1.19	1.17648	0.605	1.4	0.90865	4.16199	YES	0.027049
Na	Sc	Ti	O	1	3	2	4	-2	1.39	0.961929	1.17596	0.605	1.4	0.90847	4.16328	YES	0.428071
Fe	Sm	Ti	O	2	2	0	4	-2	0.962951	1.38895	1.17595	0.605	1.4	0.908465	4.16331	YES	0.426
V	Sm	Ti	O	2	2	0	4	-2	0.962951	1.38895	1.17595	0.605	1.4	0.908465	4.16331	YES	0.426
Nb	Ag	Ti	O	3	1	2	4	-2	1.02293	1.32442	1.17367	0.605	1.4	0.907661	4.16906	YES	0.301487
Li	La	Ti	O	1	3	2	4	-2	0.985415	1.36	1.17271	0.605	1.4	0.907321	4.17152	YES	0.374585
Ga	Tl	Ti	O	3	1	2	4	-2	0.842929	1.5	1.17146	0.605	1.4	0.906883	4.1747	YES	0.657071
Ag	In	Ti	O	1	3	2	4	-2	1.32442	1.01493	1.16967	0.605	1.4	0.906251	4.17933	YES	0.309487
Tm	Sn	Ti	O	2	2	0	4	-2	1.09	1.24695	1.16848	0.605	1.4	0.905829	4.18244	NO	0.156951
Co	Sm	Ti	O	2	2	0	4	-2	0.947951	1.38895	1.16845	0.605	1.4	0.90582	4.1825	NO	0.441
Na	Au	Ti	O	1	3	2	4	-2	1.39	0.945929	1.16796	0.605	1.4	0.905648	4.18377	NO	0.444071
Ag	Ce	Ti	O	1	3	2	4	-2	1.32442	1.01	1.16721	0.605	1.4	0.905382	4.18575	NO	0.314415
Ca	Cd	Ti	O	2	2	0	4	-2	1.19595	1.13795	1.16695	0.605	1.4	0.905291	4.18643	NO	0.058
Li	Na	Nb	O	1	1	0	5	-2	0.985415	1.39	1.18771	0.64	1.4	0.896954	4.18889	NO	0.404585
Sc	Au	Ti	O	3	1	2	4	-2	0.961929	1.37	1.16596	0.605	1.4	0.904943	4.18903	NO	0.408071
Zn	Eu	Ti	O	2	2	0	4	-2	0.966951	1.36495	1.16595	0.605	1.4	0.904938	4.18906	NO	0.398
Cd	Hg	Ti	O	2	2	0	4	-2	1.13795	1.19295	1.16545	0.605	1.4	0.904762	4.19038	NO	0.055
K	Mo	Ti	O	1	3	2	4	-2	1.64	0.69	1.165	0.605	1.4	0.904603	4.19158	NO	0.95
Cd	Pb	Ti	O	2	2	0	4	-2	1.13795	1.19	1.16398	0.605	1.4	0.904242	4.19431	NO	0.052049
Fe	Eu	Ti	O	2	2	0	4	-2	0.962951	1.36495	1.16395	0.605	1.4	0.904233	4.19437	NO	0.402
V	Eu	Ti	O	2	2	0	4	-2	0.962951	1.36495	1.16395	0.605	1.4	0.904233	4.19437	NO	0.402
Cu	Ag	Ti	O	3	1	2	4	-2	0.997951	1.32442	1.16118	0.605	1.4	0.903257	4.20181	NO	0.326464
Cr	Tl	Ti	O	3	1	2	4	-2	0.820929	1.5	1.16046	0.605	1.4	0.903003	4.20376	NO	0.679071
Mg	Eu	Ti	O	2	2	0	4	-2	0.955951	1.36495	1.16045	0.605	1.4	0.902999	4.2038	NO	0.409
Li	Au	Nb	O	1	1	0	5	-2	0.985415	1.37	1.17771	0.64	1.4	0.893488	4.20488	NO	0.384585
K	Ru	Ti	O	1	3	2	4	-2	1.64	0.68	1.16	0.605	1.4	0.90284	4.20502	NO	0.96
K	Ir	Ti	O	1	3	2	4	-2	1.64	0.68	1.16	0.605	1.4	0.90284	4.20502	NO	0.96
Cu	Ag	Nb	O	1	1	0	5	-2	1.02342	1.32442	1.17392	0.64	1.4	0.892173	4.21115	NO	0.301
Co	Tl	Ti	O	3	1	2	4	-2	0.812929	1.5	1.15646	0.605	1.4	0.901593	4.21474	NO	0.687071
Co	Eu	Ti	O	2	2	0	4	-2	0.947951	1.36495	1.15645	0.605	1.4	0.901588	4.21478	NO	0.417
Nd	Sn	Ti	O	2	2	0	4	-2	1.06293	1.24695	1.15494	0.605	1.4	0.901055	4.21898	NO	0.184022
Pd	Yb	Ti	O	2	2	0	4	-2	1.05495	1.25195	1.15345	0.605	1.4	0.90053	4.22316	NO	0.197
Pd	Sn	Ti	O	2	2	0	4	-2	1.05495	1.24695	1.15095	0.605	1.4	0.899648	4.23025	NO	0.192
Rb	As	Ti	O	1	3	2	4	-2	1.72	0.58	1.15	0.605	1.4	0.899313	4.23297	NO	1.14
Sr	Ti	Ti	O	2	2	0	4	-2	1.44	0.86	1.15	0.605	1.4	0.899313	4.23297	NO	0.58
Na	Ti	Ti	O	1	3	2	4	-2	1.39	0.906929	1.14846	0.605	1.4	0.898771	4.23738	NO	0.483071
Na	Rh	Ti	O	1	3	2	4	-2	1.39	0.905929	1.14796	0.605	1.4	0.898595	4.23883	NO	0.484071
Li	Ag	Nb	O	1	1	0	5	-2	0.985415	1.32442	1.15492	0.64	1.4	0.885587	4.24444	NO	0.339
Sc	Ag	Ti	O	3	1	2	4	-2	0.961929	1.32442	1.14317	0.605	1.4	0.896905	4.25288	NO	0.362487
Hg	Tm	Ti	O	2	2	0	4	-2	1.19295	1.09	1.14148	0.605	1.4	0.896307	4.25794	NO	0.102951
Cu	Eu	Ti	O	2	2	0	4	-2	0.917951	1.36495	1.14145	0.605	1.4	0.896298	4.25802	NO	0.447
Pt	Yb	Ti	O	2	2	0	4	-2	1.03095	1.25195	1.14145	0.605	1.4	0.896298	4.25802	NO	0.221
Ni	Eu	Ti	O	2	2	0	4	-2	0.916951	1.36495	1.14095	0.605	1.4	0.896122	4.25952	NO	0.448
Tm	Pb	Ti	O	2	2	0	4	-2	1.09	1.19	1.14	0.605	1.4	0.895786	4.26238	NO	0.1
Mn	Yb	Ti	O	2	2	0	4	-2	1.02795	1.25195	1.13995	0.605	1.4	0.895769	4.26253	NO	0.224
Ba	Ge	Ti	O	2	2	0	4	-2	1.54795	0.73	1.13898	0.605	1.4	0.895425	4.26548	NO	0.817951
Pt	Sn	Ti	O	2	2	0	4	-2	1.03095	1.24695	1.13895	0.605	1.4	0.895416	4.26555	NO	0.216
Rh	Au	Ti	O	3	1	2	4	-2	0.905929	1.37	1.13796	0.605	1.4	0.895068	4.26856	NO	0.464071
Mn	Sn	Ti	O	2	2	0	4	-2	1.02795	1.24695	1.13745	0.605	1.4	0.894887	4.27012	NO	0.219
Cu	Pr	Ti	O	1	3	2	4	-2	1.02342	1.25093	1.13717	0.605	1.4	0.894789	4.27098	NO	0.227513
Ti	Au	Ti	O	3	1	2	4	-2	0.903929	1.37	1.13696	0.605	1.4	0.894716	4.27161	NO	0.466071
Ag	Au	Ti	O	1	3	2	4	-2	1.32442	0.945929	1.13517	0.605	1.4	0.894084	4.27713	NO	0.378487
Na	Fe	Ti	O	1	3	2	4	-2	1.39	0.877929	1.13396	0.605	1.4	0.893658	4.28088	NO	0.512071
Al	Tl	Ti	O	3	1	2	4	-2	0.763929	1.5	1.13196	0.605	1.4	0.892952	4.28714	NO	0.736071
Cu	Sm	Ti	O	1	3	2	4	-2	1.02342	1.24	1.13171	0.605	1.4	0.892862	4.28795	NO	0.216585
Na	Mn	Ti	O	1	3	2	4	-2	1.39	0.872929	1.13146	0.605	1.4	0.892776	4.28872	NO	0.517071
Hg	Nd	Ti	O	2	2	0	4	-2	1.19295	1.06293	1.12794	0.605	1.4	0.891533	4.29994	NO	0.130022
Cu	Nd	Ti	O	1	3	2	4	-2	1.02342	1.22993	1.12667	0.605	1.4	0.891086	4.30402	NO	0.206513
Nd	Pb	Ti	O	2	2	0	4	-2	1.06293	1.19	1.12646	0.605	1.4	0.891013	4.30469	NO	0.127071
Ca	Pd	Ti	O	2	2	0	4	-2	1.19595	1.05495	1.12545	0.605	1.4	0.890655	4.30798	NO	0.141
Ti	Sm	Ti	O	2	2	0	4	-2	0.86	1.38895	1.12448	0.605	1.4	0.890311	4.31117	NO	0.528951
Fe	Au	Ti	O	3	1	2	4	-2	0.877929	1.37	1.12396	0.605	1.4	0.890131	4.31284	NO	0.492071
Pd	Hg	Ti	O	2	2	0	4	-2	1.05495	1.19295	1.12395	0.605	1.4	0.890126	4.31288	NO	0.138
Na	V	Ti	O	1	3	2	4	-2	1.39	0.855929	1.12296	0.605	1.4	0.889778	4.31613	NO	0.534071
Pd	Pb	Ti	O	2	2	0	4	-2	1.05495	1.19	1.12248	0.605	1.4	0.889606	4.31774	NO	0.135049
Cr	Yb	Ti	O	2	2	0	4	-2	0.992951	1.25195	1.12245	0.605	1.4	0.889597	4.31782	NO	0.259
Mn	Au	Ti	O	3	1	2	4	-2	0.872929	1.37	1.12146	0.605	1.4	0.889249	4.32109	NO	0.497071
Cr	Sn	Ti	O	2	2	0	4	-2	0.992951	1.24695	1.11995	0.605	1.4	0.888715	4.32614	NO	0.254
Li	Pr	Ti	O	1	3	2	4	-2	0.985415	1.25093	1.11817	0.605	1.4	0.888088	4.33213	NO	0.265513
Na	Ga	Ti	O	1	3	2	4	-2	1.39	0.842929	1.11646	0.605	1.4	0.887486	4.33793	NO	0.547071
Rh	Ag	Ti	O	3	1	2	4	-2	0.905929	1.32442	1.11517	0.605	1.4	0.88703	4.34235	NO	0.418487
Cu	Bi	Ti	O	1	3	2	4	-2	1.02342	1.20693	1.11517	0.605	1.4	0.88703	4.34235	NO	0.183513
Ti	Ag	Ti	O	3	1	2	4	-2	0.903929	1.32442	1.11417	0.605	1.4	0.886677	4.34579	NO	0.420487
Ca	Pt	Ti	O	2	2	0	4	-2	1.19595	1.03095	1.11345	0.605	1.4	0.886423	4.34829	NO	0.165
V	Au	Ti	O	3	1	2	4	-2	0.855929	1.37	1.11296	0.605	1.4	0.886251	4.34997	NO	0.514071
Li	Sm	Ti	O	1	3	2	4	-2	0.985415	1.24	1.11271	0.605	1.4	0.886161	4.35087	NO	0.254585
Ti	Eu	Ti	O	2	2	0	4	-2	0.86	1.36495	1.11248	0.605	1.4	0.886079	4.35167	NO	0.504951
Ca	Mn	Ti	O	2	2	0	4	-2	1.19595	1.02795	1.11195	0.605	1.4	0.885894	4.3535	NO	0.168
Pt	Hg	Ti	O	2	2	0	4	-2	1.03095	1.19295	1.11195	0.605	1.4	0.885894	4.3535	NO	0.162
Pt	Pb	Ti	O	2	2	0	4	-2	1.03095	1.19	1.11048	0.605	1.4	0.885374	4.35868	NO	0.159049
Mn	Hg	Ti	O	2	2	0	4	-2	1.02795	1.19295	1.11045	0.605	1.4	0.885365	4.35876	NO	0.165
K	As	Ti	O	1	3	2	4	-2	1.64	0.58	1.11	0.605	1.4	0.885206	4.36035	NO	1.06
Mn	Pb	Ti	O	2	2	0	4	-2	1.02795	1.19	1.10898	0.605	1.4	0.884845	4.36398	NO	0.162049
Pd	Dy	Ti	O	2	2	0	4	-2	1.05495	1.16295	1.10895	0.605	1.4	0.884836	4.36406	NO	0.108
Li	Nd	Ti	O	1	3	2	4	-2	0.985415	1.22993	1.10767	0.605	1.4	0.884385	4.36862	NO	0.244513
Fe	Yb	Ti	O	2	2	0	4	-2	0.962951	1.25195	1.10745	0.605	1.4	0.884307	4.36941	NO	0.289
V	Yb	Ti	O	2	2	0	4	-2	0.962951	1.25195	1.10745	0.605	1.4	0.884307	4.36941	NO	0.289
Zn	Sn	Ti	O	2	2	0	4	-2	0.966951	1.24695	1.10695	0.605	1.4	0.884131	4.3712	NO	0.28
Au	Ga	Ti	O	1	3	2	4	-2	1.37	0.842929	1.10646	0.605	1.4	0.883959	4.37294	NO	0.527071
Cu	Eu	Ti	O	1	3	2	4	-2	1.02342	1.18893	1.10617	0.605	1.4	0.883856	4.374	NO	0.165513
Na	Cr	Ti	O	1	3	2	4	-2	1.39	0.820929	1.10546	0.605	1.4	0.883606	4.37655	NO	0.569071
Fe	Sn	Ti	O	2	2	0	4	-2	0.962951	1.24695	1.10495	0.605	1.4	0.883425	4.37841	NO	0.284
V	Sn	Ti	O	2	2	0	4	-2	0.962951	1.24695	1.10495	0.605	1.4	0.883425	4.37841	NO	0.284
Na	Co	Ti	O	1	3	2	4	-2	1.39	0.812929	1.10146	0.605	1.4	0.882196	4.39116	NO	0.577071
Mg	Sn	Ti	O	2	2	0	4	-2	0.955951	1.24695	1.10145	0.605	1.4	0.882191	4.39121	NO	0.291
Fe	Ag	Ti	O	3	1	2	4	-2	0.877929	1.32442	1.10117	0.605	1.4	0.882093	4.39224	NO	0.446487
Co	Yb	Ti	O	2	2	0	4	-2	0.947951	1.25195	1.09995	0.605	1.4	0.881662	4.39677	NO	0.304
Mn	Ag	Ti	O	3	1	2	4	-2	0.872929	1.32442	1.09867	0.605	1.4	0.881211	4.40154	NO	0.451487
Rb	B	Ti	O	1	3	2	4	-2	1.72	0.476929	1.09846	0.605	1.4	0.881138	4.40232	NO	1.24307
Co	Sn	Ti	O	2	2	0	4	-2	0.947951	1.24695	1.09745	0.605	1.4	0.88078	4.40613	NO	0.299
Pt	Dy	Ti	O	2	2	0	4	-2	1.03095	1.16295	1.09695	0.605	1.4	0.880604	4.40802	NO	0.132
Pd	Cd	Ti	O	2	2	0	4	-2	1.05495	1.13795	1.09645	0.605	1.4	0.880428	4.40991	NO	0.083
Li	Bi	Ti	O	1	3	2	4	-2	0.985415	1.20693	1.09617	0.605	1.4	0.880329	4.41097	NO	0.221513
Be	Ba	Ti	O	2	2	0	4	-2	0.643951	1.54795	1.09595	0.605	1.4	0.880251	4.41181	NO	0.904
Cr	Au	Ti	O	3	1	2	4	-2	0.820929	1.37	1.09546	0.605	1.4	0.88008	4.41366	NO	0.549071
Mn	Dy	Ti	O	2	2	0	4	-2	1.02795	1.16295	1.09545	0.605	1.4	0.880075	4.41371	NO	0.135
Mo	Tl	Ti	O	3	1	2	4	-2	0.69	1.5	1.095	0.605	1.4	0.879916	4.41543	NO	0.81
Ca	Cr	Ti	O	2	2	0	4	-2	1.19595	0.992951	1.09445	0.605	1.4	0.879722	4.41753	NO	0.203
Cr	Hg	Ti	O	2	2	0	4	-2	0.992951	1.19295	1.09295	0.605	1.4	0.879193	4.4233	NO	0.2
Cu	Tb	Ti	O	1	3	2	4	-2	1.02342	1.16193	1.09267	0.605	1.4	0.879095	4.42438	NO	0.138513
Cr	Pb	Ti	O	2	2	0	4	-2	0.992951	1.19	1.09148	0.605	1.4	0.878673	4.42902	NO	0.197049
Co	Au	Ti	O	3	1	2	4	-2	0.812929	1.37	1.09146	0.605	1.4	0.878669	4.42906	NO	0.557071
V	Ag	Ti	O	3	1	2	4	-2	0.855929	1.32442	1.09017	0.605	1.4	0.878213	4.43411	NO	0.468487
Ru	Tl	Ti	O	3	1	2	4	-2	0.68	1.5	1.09	0.605	1.4	0.878153	4.43479	NO	0.82
Ir	Tl	Ti	O	3	1	2	4	-2	0.68	1.5	1.09	0.605	1.4	0.878153	4.43479	NO	0.82
Li	Eu	Ti	O	1	3	2	4	-2	0.985415	1.18893	1.08717	0.605	1.4	0.877155	4.44597	NO	0.203513
Sr	Ge	Ti	O	2	2	0	4	-2	1.44	0.73	1.085	0.605	1.4	0.876389	4.45467	NO	0.71
Cd	Pt	Ti	O	2	2	0	4	-2	1.13795	1.03095	1.08445	0.605	1.4	0.876196	4.45688	NO	0.107
Cu	Gd	Ti	O	1	3	2	4	-2	1.02342	1.14393	1.08367	0.605	1.4	0.875921	4.46004	NO	0.120513
Ag	Ga	Ti	O	1	3	2	4	-2	1.32442	0.842929	1.08367	0.605	1.4	0.875921	4.46004	NO	0.481487
Mn	Cd	Ti	O	2	2	0	4	-2	1.02795	1.13795	1.08295	0.605	1.4	0.875667	4.46297	NO	0.11
Cu	Sn	Ti	O	2	2	0	4	-2	0.917951	1.24695	1.08245	0.605	1.4	0.87549	4.46501	NO	0.329
Ni	Sn	Ti	O	2	2	0	4	-2	0.916951	1.24695	1.08195	0.605	1.4	0.875314	4.46706	NO	0.33
Ca	Zn	Ti	O	2	2	0	4	-2	1.19595	0.966951	1.08145	0.605	1.4	0.875138	4.46911	NO	0.229
Zn	Hg	Ti	O	2	2	0	4	-2	0.966951	1.19295	1.07995	0.605	1.4	0.874609	4.47529	NO	0.226
Ca	Fe	Ti	O	2	2	0	4	-2	1.19595	0.962951	1.07945	0.605	1.4	0.874432	4.47737	NO	0.233
Ca	V	Ti	O	2	2	0	4	-2	1.19595	0.962951	1.07945	0.605	1.4	0.874432	4.47737	NO	0.233
Zn	Pb	Ti	O	2	2	0	4	-2	0.966951	1.19	1.07848	0.605	1.4	0.874088	4.48143	NO	0.223049
Fe	Hg	Ti	O	2	2	0	4	-2	0.962951	1.19295	1.07795	0.605	1.4	0.873903	4.48362	NO	0.23
Cr	Dy	Ti	O	2	2	0	4	-2	0.992951	1.16295	1.07795	0.605	1.4	0.873903	4.48362	NO	0.17
V	Hg	Ti	O	2	2	0	4	-2	0.962951	1.19295	1.07795	0.605	1.4	0.873903	4.48362	NO	0.23
Na	Al	Ti	O	1	3	2	4	-2	1.39	0.763929	1.07696	0.605	1.4	0.873555	4.48776	NO	0.626071
Fe	Pb	Ti	O	2	2	0	4	-2	0.962951	1.19	1.07648	0.605	1.4	0.873383	4.48982	NO	0.227049
V	Pb	Ti	O	2	2	0	4	-2	0.962951	1.19	1.07648	0.605	1.4	0.873383	4.48982	NO	0.227049
Mg	Ca	Ti	O	2	2	0	4	-2	0.955951	1.19595	1.07595	0.605	1.4	0.873198	4.49204	NO	0.24
Cu	Y	Ti	O	1	3	2	4	-2	1.02342	1.12693	1.07517	0.605	1.4	0.872923	4.49534	NO	0.103513
Mg	Hg	Ti	O	2	2	0	4	-2	0.955951	1.19295	1.07445	0.605	1.4	0.872669	4.49841	NO	0.237
Li	Tb	Ti	O	1	3	2	4	-2	0.985415	1.16193	1.07367	0.605	1.4	0.872394	4.50174	NO	0.176513
Cu	Er	Ti	O	1	3	2	4	-2	1.02342	1.12293	1.07317	0.605	1.4	0.872218	4.50388	NO	0.0995135
Mg	Pb	Ti	O	2	2	0	4	-2	0.955951	1.19	1.07298	0.605	1.4	0.872149	4.50473	NO	0.234049
Cr	Ag	Ti	O	3	1	2	4	-2	0.820929	1.32442	1.07267	0.605	1.4	0.872042	4.50603	NO	0.503487
Pd	Tm	Ti	O	2	2	0	4	-2	1.05495	1.09	1.07248	0.605	1.4	0.871972	4.50688	NO	0.035049
Ca	Co	Ti	O	2	2	0	4	-2	1.19595	0.947951	1.07195	0.605	1.4	0.871787	4.50915	NO	0.248
Cu	Dy	Ti	O	1	3	2	4	-2	1.02342	1.11793	1.07067	0.605	1.4	0.871336	4.5147	NO	0.0945135
Co	Hg	Ti	O	2	2	0	4	-2	0.947951	1.19295	1.07045	0.605	1.4	0.871258	4.51566	NO	0.245
Cu	Tl	Ti	O	1	3	2	4	-2	1.02342	1.11593	1.06967	0.605	1.4	0.870984	4.51906	NO	0.0925135
Co	Pb	Ti	O	2	2	0	4	-2	0.947951	1.19	1.06898	0.605	1.4	0.870738	4.52212	NO	0.242049
Co	Ag	Ti	O	3	1	2	4	-2	0.812929	1.32442	1.06867	0.605	1.4	0.870631	4.52345	NO	0.511487
Cu	Tm	Ti	O	1	3	2	4	-2	1.02342	1.11293	1.06817	0.605	1.4	0.870455	4.52566	NO	0.0895135
Au	Al	Ti	O	1	3	2	4	-2	1.37	0.763929	1.06696	0.605	1.4	0.870029	4.531	NO	0.606071
Cr	Cd	Ti	O	2	2	0	4	-2	0.992951	1.13795	1.06545	0.605	1.4	0.869495	4.53776	NO	0.145
Li	Gd	Ti	O	1	3	2	4	-2	0.985415	1.14393	1.06467	0.605	1.4	0.86922	4.54125	NO	0.158513
Cu	Ho	Ti	O	1	3	2	4	-2	1.02342	1.10493	1.06417	0.605	1.4	0.869044	4.54351	NO	0.0815135
Fe	Dy	Ti	O	2	2	0	4	-2	0.962951	1.16295	1.06295	0.605	1.4	0.868613	4.54904	NO	0.2
V	Dy	Ti	O	2	2	0	4	-2	0.962951	1.16295	1.06295	0.605	1.4	0.868613	4.54904	NO	0.2
Pt	Tm	Ti	O	2	2	0	4	-2	1.03095	1.09	1.06048	0.605	1.4	0.86774	4.56036	NO	0.059049
Sm	Ge	Ti	O	2	2	0	4	-2	1.38895	0.73	1.05948	0.605	1.4	0.867387	4.56497	NO	0.658951
Mn	Tm	Ti	O	2	2	0	4	-2	1.02795	1.09	1.05898	0.605	1.4	0.867211	4.56729	NO	0.062049
Pd	Nd	Ti	O	2	2	0	4	-2	1.05495	1.06293	1.05894	0.605	1.4	0.867199	4.56746	NO	0.00797791
K	B	Ti	O	1	3	2	4	-2	1.64	0.476929	1.05846	0.605	1.4	0.867031	4.56967	NO	1.16307
Ca	Cu	Ti	O	2	2	0	4	-2	1.19595	0.917951	1.05695	0.605	1.4	0.866497	4.57675	NO	0.278
Ca	Ni	Ti	O	2	2	0	4	-2	1.19595	0.916951	1.05645	0.605	1.4	0.866321	4.5791	NO	0.279
Li	Y	Ti	O	1	3	2	4	-2	0.985415	1.12693	1.05617	0.605	1.4	0.866222	4.58041	NO	0.141513
Ti	Yb	Ti	O	2	2	0	4	-2	0.86	1.25195	1.05598	0.605	1.4	0.866153	4.58134	NO	0.391951
Co	Dy	Ti	O	2	2	0	4	-2	0.947951	1.16295	1.05545	0.605	1.4	0.865968	4.58382	NO	0.215
Cu	Hg	Ti	O	2	2	0	4	-2	0.917951	1.19295	1.05545	0.605	1.4	0.865968	4.58382	NO	0.275
Na	Ta	Ti	O	1	3	2	4	-2	1.39	0.72	1.055	0.605	1.4	0.865809	4.58595	NO	0.67
Ni	Hg	Ti	O	2	2	0	4	-2	0.916951	1.19295	1.05495	0.605	1.4	0.865792	4.58619	NO	0.276
Li	Er	Ti	O	1	3	2	4	-2	0.985415	1.12293	1.05417	0.605	1.4	0.865517	4.58989	NO	0.137513
Cu	Pb	Ti	O	2	2	0	4	-2	0.917951	1.19	1.05398	0.605	1.4	0.865448	4.59083	NO	0.272049
Ti	Sn	Ti	O	2	2	0	4	-2	0.86	1.24695	1.05348	0.605	1.4	0.865271	4.59322	NO	0.386951
Ni	Pb	Ti	O	2	2	0	4	-2	0.916951	1.19	1.05348	0.605	1.4	0.865271	4.59322	NO	0.273049
Zn	Cd	Ti	O	2	2	0	4	-2	0.966951	1.13795	1.05245	0.605	1.4	0.86491	4.59814	NO	0.171
Li	Dy	Ti	O	1	3	2	4	-2	0.985415	1.11793	1.05167	0.605	1.4	0.864635	4.6019	NO	0.132513
Li	Tl	Ti	O	1	3	2	4	-2	0.985415	1.11593	1.05067	0.605	1.4	0.864283	4.60674	NO	0.130513
Fe	Cd	Ti	O	2	2	0	4	-2	0.962951	1.13795	1.05045	0.605	1.4	0.864205	4.60782	NO	0.175
V	Cd	Ti	O	2	2	0	4	-2	0.962951	1.13795	1.05045	0.605	1.4	0.864205	4.60782	NO	0.175
Li	Tm	Ti	O	1	3	2	4	-2	0.985415	1.11293	1.04917	0.605	1.4	0.863754	4.61407	NO	0.127513
Eu	Ge	Ti	O	2	2	0	4	-2	1.36495	0.73	1.04748	0.605	1.4	0.863155	4.62242	NO	0.634951
Mg	Cd	Ti	O	2	2	0	4	-2	0.955951	1.13795	1.04695	0.605	1.4	0.86297	4.62502	NO	0.182
Pt	Nd	Ti	O	2	2	0	4	-2	1.03095	1.06293	1.04694	0.605	1.4	0.862967	4.62508	NO	0.0319779
Cu	Sb	Ti	O	1	3	2	4	-2	1.02342	1.06793	1.04567	0.605	1.4	0.862519	4.63139	NO	0.0445135
Mn	Nd	Ti	O	2	2	0	4	-2	1.02795	1.06293	1.04544	0.605	1.4	0.862437	4.63256	NO	0.0349779
Li	Ho	Ti	O	1	3	2	4	-2	0.985415	1.10493	1.04517	0.605	1.4	0.862343	4.6339	NO	0.119513
Cu	Yb	Ti	O	1	3	2	4	-2	1.02342	1.06693	1.04517	0.605	1.4	0.862343	4.6339	NO	0.0435135
Ag	Al	Ti	O	1	3	2	4	-2	1.32442	0.763929	1.04417	0.605	1.4	0.86199	4.63893	NO	0.560487
Co	Cd	Ti	O	2	2	0	4	-2	0.947951	1.13795	1.04295	0.605	1.4	0.86156	4.6451	NO	0.19
Pd	Pt	Ti	O	2	2	0	4	-2	1.05495	1.03095	1.04295	0.605	1.4	0.86156	4.6451	NO	0.024
Be	Sr	Ti	O	2	2	0	4	-2	0.643951	1.44	1.04198	0.605	1.4	0.861216	4.65007	NO	0.796049
Cu	Lu	Ti	O	1	3	2	4	-2	1.02342	1.05993	1.04167	0.605	1.4	0.861109	4.65162	NO	0.0365135
Cr	Tm	Ti	O	2	2	0	4	-2	0.992951	1.09	1.04148	0.605	1.4	0.861039	4.65263	NO	0.097049
Mn	Pd	Ti	O	2	2	0	4	-2	1.02795	1.05495	1.04145	0.605	1.4	0.861031	4.65275	NO	0.027
Na	Mo	Ti	O	1	3	2	4	-2	1.39	0.69	1.04	0.605	1.4	0.860519	4.66021	NO	0.7
As	Tl	Ti	O	3	1	2	4	-2	0.58	1.5	1.04	0.605	1.4	0.860519	4.66021	NO	0.92
Li	Cu	Nb	O	1	1	0	5	-2	0.985415	1.02342	1.00442	0.64	1.4	0.833421	4.66969	NO	0.038
Na	Ru	Ti	O	1	3	2	4	-2	1.39	0.68	1.035	0.605	1.4	0.858756	4.68639	NO	0.71
Na	Ir	Ti	O	1	3	2	4	-2	1.39	0.68	1.035	0.605	1.4	0.858756	4.68639	NO	0.71
Mo	Au	Ti	O	3	1	2	4	-2	0.69	1.37	1.03	0.605	1.4	0.856992	4.71332	NO	0.68
Mn	Pt	Ti	O	2	2	0	4	-2	1.02795	1.03095	1.02945	0.605	1.4	0.856799	4.71632	NO	0.003
Ca	Ti	Ti	O	2	2	0	4	-2	1.19595	0.86	1.02798	0.605	1.4	0.856278	4.72444	NO	0.335951
Cu	Cd	Ti	O	2	2	0	4	-2	0.917951	1.13795	1.02795	0.605	1.4	0.85627	4.72458	NO	0.22
Cr	Nd	Ti	O	2	2	0	4	-2	0.992951	1.06293	1.02794	0.605	1.4	0.856266	4.72464	NO	0.0699779
Ni	Cd	Ti	O	2	2	0	4	-2	0.916951	1.13795	1.02745	0.605	1.4	0.856093	4.72735	NO	0.221
Li	Sb	Ti	O	1	3	2	4	-2	0.985415	1.06793	1.02667	0.605	1.4	0.855819	4.73167	NO	0.0825135
Fe	Tm	Ti	O	2	2	0	4	-2	0.962951	1.09	1.02648	0.605	1.4	0.855749	4.73277	NO	0.127049
V	Tm	Ti	O	2	2	0	4	-2	0.962951	1.09	1.02648	0.605	1.4	0.855749	4.73277	NO	0.127049
Ti	Hg	Ti	O	2	2	0	4	-2	0.86	1.19295	1.02648	0.605	1.4	0.855749	4.73277	NO	0.332951
Li	Yb	Ti	O	1	3	2	4	-2	0.985415	1.06693	1.02617	0.605	1.4	0.855642	4.73446	NO	0.0815135
Ru	Au	Ti	O	3	1	2	4	-2	0.68	1.37	1.025	0.605	1.4	0.855229	4.74103	NO	0.69
Ir	Au	Ti	O	3	1	2	4	-2	0.68	1.37	1.025	0.605	1.4	0.855229	4.74103	NO	0.69
Ti	Pb	Ti	O	2	2	0	4	-2	0.86	1.19	1.025	0.605	1.4	0.855229	4.74103	NO	0.33
Cr	Pd	Ti	O	2	2	0	4	-2	0.992951	1.05495	1.02395	0.605	1.4	0.854859	4.74695	NO	0.062
Cu	Nb	Ti	O	1	3	2	4	-2	1.02342	1.02293	1.02317	0.605	1.4	0.854584	4.75136	NO	0.000486547
Li	Lu	Ti	O	1	3	2	4	-2	0.985415	1.05993	1.02267	0.605	1.4	0.854408	4.75421	NO	0.0745135
Cu	In	Ti	O	1	3	2	4	-2	1.02342	1.01493	1.01917	0.605	1.4	0.853174	4.77436	NO	0.00848655
Co	Tm	Ti	O	2	2	0	4	-2	0.947951	1.09	1.01898	0.605	1.4	0.853104	4.7755	NO	0.142049
Cu	Ce	Ti	O	1	3	2	4	-2	1.02342	1.01	1.01671	0.605	1.4	0.852304	4.78879	NO	0.0134155
Fe	Nd	Ti	O	2	2	0	4	-2	0.962951	1.06293	1.01294	0.605	1.4	0.850976	4.81127	NO	0.0999779
V	Nd	Ti	O	2	2	0	4	-2	0.962951	1.06293	1.01294	0.605	1.4	0.850976	4.81127	NO	0.0999779
Cr	Pt	Ti	O	2	2	0	4	-2	0.992951	1.03095	1.01195	0.605	1.4	0.850627	4.81725	NO	0.038
Ti	Dy	Ti	O	2	2	0	4	-2	0.86	1.16295	1.01148	0.605	1.4	0.850459	4.82014	NO	0.302951
Zn	Pd	Ti	O	2	2	0	4	-2	0.966951	1.05495	1.01095	0.605	1.4	0.850274	4.82334	NO	0.088
Cr	Mn	Ti	O	2	2	0	4	-2	0.992951	1.02795	1.01045	0.605	1.4	0.850098	4.82639	NO	0.035
Fe	Pd	Ti	O	2	2	0	4	-2	0.962951	1.05495	1.00895	0.605	1.4	0.849569	4.83561	NO	0.092
V	Pd	Ti	O	2	2	0	4	-2	0.962951	1.05495	1.00895	0.605	1.4	0.849569	4.83561	NO	0.092
Mo	Ag	Ti	O	3	1	2	4	-2	0.69	1.32442	1.00721	0.605	1.4	0.848954	4.84643	NO	0.634415
Mg	Pd	Ti	O	2	2	0	4	-2	0.955951	1.05495	1.00545	0.605	1.4	0.848335	4.85745	NO	0.099
Co	Nd	Ti	O	2	2	0	4	-2	0.947951	1.06293	1.00544	0.605	1.4	0.848331	4.85752	NO	0.114978
Be	Eu	Ti	O	2	2	0	4	-2	0.643951	1.36495	1.00445	0.605	1.4	0.847982	4.86377	NO	0.721
Li	Nb	Ti	O	1	3	2	4	-2	0.985415	1.02293	1.00417	0.605	1.4	0.847884	4.86554	NO	0.0375135
Ru	Ag	Ti	O	3	1	2	4	-2	0.68	1.32442	1.00221	0.605	1.4	0.847191	4.87809	NO	0.644415
Ag	Ir	Ti	O	1	3	2	4	-2	1.32442	0.68	1.00221	0.605	1.4	0.847191	4.87809	NO	0.644415
Co	Pd	Ti	O	2	2	0	4	-2	0.947951	1.05495	1.00145	0.605	1.4	0.846924	4.88297	NO	0.107
Li	In	Ti	O	1	3	2	4	-2	0.985415	1.01493	1.00017	0.605	1.4	0.846473	4.89125	NO	0.0295135
Ti	Cd	Ti	O	2	2	0	4	-2	0.86	1.13795	0.998976	0.605	1.4	0.846051	4.89907	NO	0.277951
Zn	Pt	Ti	O	2	2	0	4	-2	0.966951	1.03095	0.998951	0.605	1.4	0.846042	4.89923	NO	0.064
Li	Ce	Ti	O	1	3	2	4	-2	0.985415	1.01	0.997708	0.605	1.4	0.845604	4.90741	NO	0.0245845
Mn	Zn	Ti	O	2	2	0	4	-2	1.02795	0.966951	0.997451	0.605	1.4	0.845513	4.9091	NO	0.061
Fe	Pt	Ti	O	2	2	0	4	-2	0.962951	1.03095	0.996951	0.605	1.4	0.845337	4.91241	NO	0.068
V	Pt	Ti	O	2	2	0	4	-2	0.962951	1.03095	0.996951	0.605	1.4	0.845337	4.91241	NO	0.068
Mn	Fe	Ti	O	2	2	0	4	-2	1.02795	0.962951	0.995451	0.605	1.4	0.844808	4.92241	NO	0.065
V	Mn	Ti	O	2	2	0	4	-2	0.962951	1.02795	0.995451	0.605	1.4	0.844808	4.92241	NO	0.065
Mg	Pt	Ti	O	2	2	0	4	-2	0.955951	1.03095	0.993451	0.605	1.4	0.844102	4.93587	NO	0.075
Sc	Cu	Ti	O	3	1	2	4	-2	0.961929	1.02342	0.992672	0.605	1.4	0.843828	4.94116	NO	0.0614865
Mg	Mn	Ti	O	2	2	0	4	-2	0.955951	1.02795	0.991951	0.605	1.4	0.843573	4.94608	NO	0.072
Li	Cu	Ti	O	1	3	2	4	-2	0.985415	0.997951	0.991683	0.605	1.4	0.843479	4.94791	NO	0.0125355
Yb	Ge	Ti	O	2	2	0	4	-2	1.25195	0.73	0.990976	0.605	1.4	0.843229	4.95277	NO	0.521951
Co	Pt	Ti	O	2	2	0	4	-2	0.947951	1.03095	0.989451	0.605	1.4	0.842692	4.9633	NO	0.083
Ge	Sn	Ti	O	2	2	0	4	-2	0.73	1.24695	0.988476	0.605	1.4	0.842348	4.97009	NO	0.516951
B	Tl	Ti	O	3	1	2	4	-2	0.476929	1.5	0.988464	0.605	1.4	0.842344	4.97017	NO	1.02307
Mn	Co	Ti	O	2	2	0	4	-2	1.02795	0.947951	0.987951	0.605	1.4	0.842163	4.97376	NO	0.08
Cu	Pd	Ti	O	2	2	0	4	-2	0.917951	1.05495	0.986451	0.605	1.4	0.841634	4.98432	NO	0.137
Ni	Pd	Ti	O	2	2	0	4	-2	0.916951	1.05495	0.985951	0.605	1.4	0.841457	4.98786	NO	0.138
Na	As	Ti	O	1	3	2	4	-2	1.39	0.58	0.985	0.605	1.4	0.841122	4.99462	NO	0.81
Cu	Au	Ti	O	1	3	2	4	-2	1.02342	0.945929	0.984672	0.605	1.4	0.841006	4.99696	NO	0.0774865
Cr	Zn	Ti	O	2	2	0	4	-2	0.992951	0.966951	0.979951	0.605	1.4	0.839341	5.0312	NO	0.026
Cr	Fe	Ti	O	2	2	0	4	-2	0.992951	0.962951	0.977951	0.605	1.4	0.838636	5.04601	NO	0.03
V	Cr	Ti	O	2	2	0	4	-2	0.962951	0.992951	0.977951	0.605	1.4	0.838636	5.04601	NO	0.03
Ti	Tm	Ti	O	2	2	0	4	-2	0.86	1.09	0.975	0.605	1.4	0.837595	5.0682	NO	0.23
Au	As	Ti	O	1	3	2	4	-2	1.37	0.58	0.975	0.605	1.4	0.837595	5.0682	NO	0.79
Mg	Cr	Ti	O	2	2	0	4	-2	0.955951	0.992951	0.974451	0.605	1.4	0.837402	5.07237	NO	0.037
Cu	Pt	Ti	O	2	2	0	4	-2	0.917951	1.03095	0.974451	0.605	1.4	0.837402	5.07237	NO	0.113
Ni	Pt	Ti	O	2	2	0	4	-2	0.916951	1.03095	0.973951	0.605	1.4	0.837225	5.07619	NO	0.114
Li	Sc	Ti	O	1	3	2	4	-2	0.985415	0.961929	0.973672	0.605	1.4	0.837127	5.07832	NO	0.0234865
Mn	Cu	Ti	O	2	2	0	4	-2	1.02795	0.917951	0.972951	0.605	1.4	0.836873	5.08385	NO	0.11
Mn	Ni	Ti	O	2	2	0	4	-2	1.02795	0.916951	0.972451	0.605	1.4	0.836696	5.0877	NO	0.111
Cr	Co	Ti	O	2	2	0	4	-2	0.992951	0.947951	0.970451	0.605	1.4	0.835991	5.10322	NO	0.045
Li	Au	Ti	O	1	3	2	4	-2	0.985415	0.945929	0.965672	0.605	1.4	0.834306	5.14111	NO	0.0394865
Fe	Zn	Ti	O	2	2	0	4	-2	0.962951	0.966951	0.964951	0.605	1.4	0.834051	5.14693	NO	0.004
V	Zn	Ti	O	2	2	0	4	-2	0.962951	0.966951	0.964951	0.605	1.4	0.834051	5.14693	NO	0.004
Cu	Rh	Ti	O	1	3	2	4	-2	1.02342	0.905929	0.964672	0.605	1.4	0.833953	5.14918	NO	0.117487
Ti	Cu	Ti	O	3	1	2	4	-2	0.903929	1.02342	0.963672	0.605	1.4	0.8336	5.15731	NO	0.119487
Ca	Ge	Ti	O	2	2	0	4	-2	1.19595	0.73	0.962976	0.605	1.4	0.833355	5.163	NO	0.465951
V	Fe	Ti	O	2	2	0	4	-2	0.962951	0.962951	0.962951	0.605	1.4	0.833346	5.1632	NO	0
Hg	Ge	Ti	O	2	2	0	4	-2	1.19295	0.73	0.961476	0.605	1.4	0.832826	5.17535	NO	0.462951
Ti	Nd	Ti	O	2	2	0	4	-2	0.86	1.06293	0.961464	0.605	1.4	0.832822	5.17544	NO	0.202929
Mg	Zn	Ti	O	2	2	0	4	-2	0.955951	0.966951	0.961451	0.605	1.4	0.832817	5.17555	NO	0.011
Ge	Pb	Ti	O	2	2	0	4	-2	0.73	1.19	0.96	0.605	1.4	0.832305	5.18761	NO	0.46
Mg	Fe	Ti	O	2	2	0	4	-2	0.955951	0.962951	0.959451	0.605	1.4	0.832112	5.1922	NO	0.007
Mg	V	Ti	O	2	2	0	4	-2	0.955951	0.962951	0.959451	0.605	1.4	0.832112	5.1922	NO	0.007
Ti	Pd	Ti	O	2	2	0	4	-2	0.86	1.05495	0.957476	0.605	1.4	0.831415	5.20885	NO	0.194951
Co	Zn	Ti	O	2	2	0	4	-2	0.947951	0.966951	0.957451	0.605	1.4	0.831406	5.20906	NO	0.019
Fe	Co	Ti	O	2	2	0	4	-2	0.962951	0.947951	0.955451	0.605	1.4	0.830701	5.22614	NO	0.015
V	Co	Ti	O	2	2	0	4	-2	0.962951	0.947951	0.955451	0.605	1.4	0.830701	5.22614	NO	0.015
Cr	Cu	Ti	O	2	2	0	4	-2	0.992951	0.917951	0.955451	0.605	1.4	0.830701	5.22614	NO	0.075
Cr	Ni	Ti	O	2	2	0	4	-2	0.992951	0.916951	0.954951	0.605	1.4	0.830525	5.23045	NO	0.076
Ag	As	Ti	O	1	3	2	4	-2	1.32442	0.58	0.952208	0.605	1.4	0.829557	5.25432	NO	0.744415
Mg	Co	Ti	O	2	2	0	4	-2	0.955951	0.947951	0.951951	0.605	1.4	0.829467	5.25658	NO	0.008
Fe	Cu	Ti	O	3	1	2	4	-2	0.877929	1.02342	0.950672	0.605	1.4	0.829016	5.26788	NO	0.145487
Mn	Cu	Ti	O	3	1	2	4	-2	0.872929	1.02342	0.948172	0.605	1.4	0.828134	5.29023	NO	0.150487
Dy	Ge	Ti	O	2	2	0	4	-2	1.16295	0.73	0.946476	0.605	1.4	0.827536	5.30562	NO	0.432951
Li	Ti	Ti	O	1	3	2	4	-2	0.985415	0.906929	0.946172	0.605	1.4	0.827429	5.30839	NO	0.0784865
Li	Rh	Ti	O	1	3	2	4	-2	0.985415	0.905929	0.945672	0.605	1.4	0.827252	5.31297	NO	0.0794865
Ti	Pt	Ti	O	2	2	0	4	-2	0.86	1.03095	0.945476	0.605	1.4	0.827183	5.31477	NO	0.170951
Be	Sn	Ti	O	2	2	0	4	-2	0.643951	1.24695	0.945451	0.605	1.4	0.827174	5.315	NO	0.603
Ti	Mn	Ti	O	2	2	0	4	-2	0.86	1.02795	0.943976	0.605	1.4	0.826654	5.32861	NO	0.167951
Cu	Zn	Ti	O	2	2	0	4	-2	0.917951	0.966951	0.942451	0.605	1.4	0.826116	5.34282	NO	0.049
Ni	Zn	Ti	O	2	2	0	4	-2	0.916951	0.966951	0.941951	0.605	1.4	0.82594	5.34751	NO	0.05
Fe	Cu	Ti	O	2	2	0	4	-2	0.962951	0.917951	0.940451	0.605	1.4	0.825411	5.36168	NO	0.045
V	Cu	Ti	O	2	2	0	4	-2	0.962951	0.917951	0.940451	0.605	1.4	0.825411	5.36168	NO	0.045
Fe	Ni	Ti	O	2	2	0	4	-2	0.962951	0.916951	0.939951	0.605	1.4	0.825235	5.36644	NO	0.046
V	Ni	Ti	O	2	2	0	4	-2	0.962951	0.916951	0.939951	0.605	1.4	0.825235	5.36644	NO	0.046
V	Cu	Ti	O	3	1	2	4	-2	0.855929	1.02342	0.939672	0.605	1.4	0.825136	5.36909	NO	0.167487
Mg	Cu	Ti	O	2	2	0	4	-2	0.955951	0.917951	0.936951	0.605	1.4	0.824177	5.3953	NO	0.038
Mg	Ni	Ti	O	2	2	0	4	-2	0.955951	0.916951	0.936451	0.605	1.4	0.824	5.40017	NO	0.039
Cd	Ge	Ti	O	2	2	0	4	-2	1.13795	0.73	0.933976	0.605	1.4	0.823127	5.42452	NO	0.407951
Na	B	Ti	O	1	3	2	4	-2	1.39	0.476929	0.933464	0.605	1.4	0.822947	5.4296	NO	0.913071
Cu	Ga	Ti	O	1	3	2	4	-2	1.02342	0.842929	0.933172	0.605	1.4	0.822844	5.43251	NO	0.180487
Co	Cu	Ti	O	2	2	0	4	-2	0.947951	0.917951	0.932951	0.605	1.4	0.822766	5.43472	NO	0.03
Co	Ni	Ti	O	2	2	0	4	-2	0.947951	0.916951	0.932451	0.605	1.4	0.822589	5.43972	NO	0.031
Li	Fe	Ti	O	1	3	2	4	-2	0.985415	0.877929	0.931672	0.605	1.4	0.822315	5.44755	NO	0.107487
Li	Mn	Ti	O	1	3	2	4	-2	0.985415	0.872929	0.929172	0.605	1.4	0.821433	5.47296	NO	0.112487
Ti	Cr	Ti	O	2	2	0	4	-2	0.86	0.992951	0.926476	0.605	1.4	0.820482	5.50087	NO	0.132951
Au	B	Ti	O	1	3	2	4	-2	1.37	0.476929	0.923464	0.605	1.4	0.81942	5.53265	NO	0.893071
Cr	Cu	Ti	O	3	1	2	4	-2	0.820929	1.02342	0.922172	0.605	1.4	0.818964	5.5465	NO	0.202487
Li	V	Ti	O	1	3	2	4	-2	0.985415	0.855929	0.920672	0.605	1.4	0.818435	5.56273	NO	0.129487
Be	Ca	Ti	O	2	2	0	4	-2	0.643951	1.19595	0.919951	0.605	1.4	0.818181	5.5706	NO	0.552
Be	Hg	Ti	O	2	2	0	4	-2	0.643951	1.19295	0.918451	0.605	1.4	0.817652	5.58708	NO	0.549
Co	Cu	Ti	O	3	1	2	4	-2	0.812929	1.02342	0.918172	0.605	1.4	0.817554	5.59017	NO	0.210487
Ni	Cu	Ti	O	2	2	0	4	-2	0.916951	0.917951	0.917451	0.605	1.4	0.817299	5.59817	NO	0.001
Be	Pb	Ti	O	2	2	0	4	-2	0.643951	1.19	0.916976	0.605	1.4	0.817132	5.60347	NO	0.546049
Li	Ga	Ti	O	1	3	2	4	-2	0.985415	0.842929	0.914172	0.605	1.4	0.816143	5.63509	NO	0.142487
Ti	Zn	Ti	O	2	2	0	4	-2	0.86	0.966951	0.913476	0.605	1.4	0.815897	5.64305	NO	0.106951
Ti	Fe	Ti	O	2	2	0	4	-2	0.86	0.962951	0.911476	0.605	1.4	0.815192	5.66611	NO	0.102951
Ti	V	Ti	O	2	2	0	4	-2	0.86	0.962951	0.911476	0.605	1.4	0.815192	5.66611	NO	0.102951
Tm	Ge	Ti	O	2	2	0	4	-2	1.09	0.73	0.91	0.605	1.4	0.814672	5.68334	NO	0.36
Mg	Ti	Ti	O	2	2	0	4	-2	0.955951	0.86	0.907976	0.605	1.4	0.813958	5.70729	NO	0.095951
Ti	Co	Ti	O	2	2	0	4	-2	0.86	0.947951	0.903976	0.605	1.4	0.812547	5.75564	NO	0.087951
Li	Cr	Ti	O	1	3	2	4	-2	0.985415	0.820929	0.903172	0.605	1.4	0.812264	5.76553	NO	0.164487
Ag	B	Ti	O	1	3	2	4	-2	1.32442	0.476929	0.900672	0.605	1.4	0.811382	5.79666	NO	0.847487
Li	Co	Ti	O	1	3	2	4	-2	0.985415	0.812929	0.899172	0.605	1.4	0.810853	5.81563	NO	0.172487
Nd	Ge	Ti	O	2	2	0	4	-2	1.06293	0.73	0.896464	0.605	1.4	0.809898	5.8504	NO	0.332929
Cu	Al	Ti	O	1	3	2	4	-2	1.02342	0.763929	0.893672	0.605	1.4	0.808913	5.887	NO	0.259487
Pd	Ge	Ti	O	2	2	0	4	-2	1.05495	0.73	0.892476	0.605	1.4	0.808491	5.90293	NO	0.324951
Be	Cd	Ti	O	2	2	0	4	-2	0.643951	1.13795	0.890951	0.605	1.4	0.807954	5.92343	NO	0.494
Ti	Cu	Ti	O	2	2	0	4	-2	0.86	0.917951	0.888976	0.605	1.4	0.807257	5.95035	NO	0.057951
Ti	Ni	Ti	O	2	2	0	4	-2	0.86	0.916951	0.888476	0.605	1.4	0.807081	5.95723	NO	0.056951
Pt	Ge	Ti	O	2	2	0	4	-2	1.03095	0.73	0.880476	0.605	1.4	0.804259	6.07098	NO	0.300951
Mn	Ge	Ti	O	2	2	0	4	-2	1.02795	0.73	0.878976	0.605	1.4	0.80373	6.09312	NO	0.297951
Li	Al	Ti	O	1	3	2	4	-2	0.985415	0.763929	0.874672	0.605	1.4	0.802213	6.1581	NO	0.221487
Cu	Ta	Ti	O	1	3	2	4	-2	1.02342	0.72	0.871708	0.605	1.4	0.801167	6.20418	NO	0.303415
Cr	Ge	Ti	O	2	2	0	4	-2	0.992951	0.73	0.861476	0.605	1.4	0.797558	6.37208	NO	0.262951
Cu	Mo	Ti	O	1	3	2	4	-2	1.02342	0.69	0.856708	0.605	1.4	0.795877	6.45532	NO	0.333415
Li	Ta	Ti	O	1	3	2	4	-2	0.985415	0.72	0.852708	0.605	1.4	0.794466	6.52781	NO	0.265415
Cu	Ru	Ti	O	1	3	2	4	-2	1.02342	0.68	0.851708	0.605	1.4	0.794114	6.54633	NO	0.343415
Cu	Ir	Ti	O	1	3	2	4	-2	1.02342	0.68	0.851708	0.605	1.4	0.794114	6.54633	NO	0.343415
Be	Pd	Ti	O	2	2	0	4	-2	0.643951	1.05495	0.849451	0.605	1.4	0.793318	6.58871	NO	0.411
Zn	Ge	Ti	O	2	2	0	4	-2	0.966951	0.73	0.848476	0.605	1.4	0.792974	6.60728	NO	0.236951
Fe	Ge	Ti	O	2	2	0	4	-2	0.962951	0.73	0.846476	0.605	1.4	0.792268	6.64587	NO	0.232951
V	Ge	Ti	O	2	2	0	4	-2	0.962951	0.73	0.846476	0.605	1.4	0.792268	6.64587	NO	0.232951
Mg	Ge	Ti	O	2	2	0	4	-2	0.955951	0.73	0.842976	0.605	1.4	0.791034	6.71506	NO	0.225951
Co	Ge	Ti	O	2	2	0	4	-2	0.947951	0.73	0.838976	0.605	1.4	0.789623	6.79684	NO	0.217951
Li	Mo	Ti	O	1	3	2	4	-2	0.985415	0.69	0.837708	0.605	1.4	0.789176	6.82337	NO	0.295415
Be	Pt	Ti	O	2	2	0	4	-2	0.643951	1.03095	0.837451	0.605	1.4	0.789086	6.82879	NO	0.387
Be	Mn	Ti	O	2	2	0	4	-2	0.643951	1.02795	0.835951	0.605	1.4	0.788557	6.86066	NO	0.384
Li	Ru	Ti	O	1	3	2	4	-2	0.985415	0.68	0.832708	0.605	1.4	0.787413	6.9311	NO	0.305415
Li	Ir	Ti	O	1	3	2	4	-2	0.985415	0.68	0.832708	0.605	1.4	0.787413	6.9311	NO	0.305415
Cu	Ge	Ti	O	2	2	0	4	-2	0.917951	0.73	0.823976	0.605	1.4	0.784333	7.13172	NO	0.187951
Ni	Ge	Ti	O	2	2	0	4	-2	0.916951	0.73	0.823476	0.605	1.4	0.784157	7.14372	NO	0.186951
Be	Cr	Ti	O	2	2	0	4	-2	0.643951	0.992951	0.818451	0.605	1.4	0.782385	7.26758	NO	0.349
Be	Zn	Ti	O	2	2	0	4	-2	0.643951	0.966951	0.805451	0.605	1.4	0.7778	7.61835	NO	0.323
Be	Fe	Ti	O	2	2	0	4	-2	0.643951	0.962951	0.803451	0.605	1.4	0.777095	7.67658	NO	0.319
Be	V	Ti	O	2	2	0	4	-2	0.643951	0.962951	0.803451	0.605	1.4	0.777095	7.67658	NO	0.319
Cu	As	Ti	O	1	3	2	4	-2	1.02342	0.58	0.801708	0.605	1.4	0.77648	7.72835	NO	0.443415
Be	Mg	Ti	O	2	2	0	4	-2	0.643951	0.955951	0.799951	0.605	1.4	0.77586	7.7815	NO	0.312
Be	Co	Ti	O	2	2	0	4	-2	0.643951	0.947951	0.795951	0.605	1.4	0.77445	7.9063	NO	0.304
Ti	Ge	Ti	O	2	2	0	4	-2	0.86	0.73	0.795	0.605	1.4	0.774114	7.93678	NO	0.13
Li	As	Ti	O	1	3	2	4	-2	0.985415	0.58	0.782708	0.605	1.4	0.769779	8.36125	NO	0.405415
Be	Cu	Ti	O	2	2	0	4	-2	0.643951	0.917951	0.780951	0.605	1.4	0.76916	8.42693	NO	0.274
Be	Ni	Ti	O	2	2	0	4	-2	0.643951	0.916951	0.780451	0.605	1.4	0.768983	8.44587	NO	0.273
Be	Ti	Ti	O	2	2	0	4	-2	0.643951	0.86	0.751976	0.605	1.4	0.758941	9.74463	NO	0.216049
Cu	B	Ti	O	1	3	2	4	-2	1.02342	0.476929	0.750172	0.605	1.4	0.758305	9.84452	NO	0.546487
Li	B	Ti	O	1	3	2	4	-2	0.985415	0.476929	0.731172	0.605	1.4	0.751604	11.0745	NO	0.508487
Be	Ge	Ti	O	2	2	0	4	-2	0.643951	0.73	0.686976	0.605	1.4	0.736017	16.186	NO	0.086049
